# Supplementary material for: The molecular sensory machinery of a Chagas disease vector: expression changes through imaginal moult and sexually dimorphic features
Source: PubMed Central journal article supplement (PMC5216343; doi:10.1038/srep40049), 2017-01-06
Supplement: srep40049-s1.pdf [file srep40049-s1.pdf]

**The molecular sensory machinery of a Chagas disease vector:  
expression changes through imaginal moult and sexually  
dimorphic features**

**Jose Manuel Latorre-Estivalis; Hugh M. Robertson; Kimberly K. O. Walden; Jerônimo  
Ruiz; Leilane Oliveira Gonçalves; Alessandra Guarneri and Marcelo Gustavo Lorenzo**

## DATASETS

Dataset S1 – Nucleotides sequences of all genes studied.

Dataset S2 – Edited Generic Feature Format (GFF) file of the *R. prolixus* genome used to perform the read mapping and gene expression analysis.

Dataset S3 – Cuffdiff output including VectorBase code, genome location and FPKM values for the *R. prolixus* transcripts in the three antennal libraries. In those genes with Test status = HIDATA (too many fragments in locus), raw read counts from HTseq (Supplementary Table S7) were used to calculate their FPKM values.

**Figure S1 – Molecular phylogenetic analysis of CheA and CheB protein families of *R. prolixus* and other insects.**

The evolutionary history was inferred by using the Maximum Likelihood method in MEGA6.0. The topology of the tree with the highest log likelihood (-8152.8619) is shown. The percentage of trees (higher than 70) in which the associated taxa clustered together is shown next to the branches.

Initial tree(s) for the heuristic search were obtained by applying the Neighbor-Joining method to a matrix of pairwise distances estimated using a WAG and F models. The analysis involved 22 amino acid sequences from *R. prolixus* (identified with RPRC and their corresponding annotation), *D. melanogaster* (Dmel); and *A. aegypti* (identified by AAEL). Sequences of *D. melanogaster* and *A. aegypti* were obtained from Xu *et al.* (2002) and Bohbot *et al.* (2014), respectively.

**Figure S2 – Molecular phylogenetic analysis of SMMP/CD36 protein family of *R. prolixus* and other insects.**

The evolutionary history was inferred by using the Maximum Likelihood method in MEGA6.0. The topology of the tree with the highest log likelihood (-12121.1360) is shown. The percentage of trees (higher than 70) in which the associated taxa clustered together is shown next to the branches. Initial tree(s) for the heuristic search were obtained by applying the Neighbor-Joining method to a matrix of pairwise distances estimated using a LG and F models. The analysis involved 52 amino acid sequences from *R. prolixus* (identified with RPRC and their corresponding annotation), *D. melanogaster* (Dmel); *T. castaneum* (Tcas); *A. mellifera* (Amel); and *D. pseudoobscura* (Dpse). Sequences from other insects were obtained from Nichols and Vogt (2007).

**Figure S3 – FPKM increase of odorant (A) and ionotropic (B) receptor expression in female and male adult antennae compared to larval antennae.**

OR and IR genes with FPKM value >1 in at least one adult condition were included. OR pseudogenes (6), genes with FPKM value = 0 in larvae (5 ORs and 1 IR), genes with FPKM<1 in

adults (12 ORs and 3 IRs) and genes with lower expression in adults compared to larval antennae (2 ORs) were not included in the figure. The figure was created using Circos v0.63-9 (<http://mkweb.bcgsc.ca>). Fold changes calculated based on FPKM values for each gene are detailed in Supplementary Table S6.

**Figure S4 – FPKM increase of ionotropic receptor expression in male compared to female adult antennae.**

IR genes with FPKM value >1 in at least one adult condition were included. Four IR genes (*Ir101-Ir104*) with FPKM value <1 in both libraries were not included in the figure. The figure was created using Circos v0.63-9 (<http://mkweb.bcgsc.ca>). Fold changes calculated based on FPKM values for each gene are detailed in Supplementary Table S6.

**Figure S5 – Heat maps of the secreted esterases belonging to the detoxification/pheromone hormone processing class (A) and CYP4 clade members of the CypP450 protein family (B), comparing their expression in *R. prolixus* larval (L), female (F) and male (M) antennae.**

Expression levels (represented as Log<sub>10</sub> FPKM +1) were depicted with a color scale in which white and orange represent lowest and highest expression, respectively. All gene sequences were obtained from Schama *et al.* (2015).

**Figure S6 - Correlation of transcript abundances found for larval and adult expression data using RNA-Seq and qRT-PCR.**

Spearman's rank correlation coefficients (R) for each library comparison are shown in the figure. Data used to create these graphs are detailed in Supplementary Table S5.

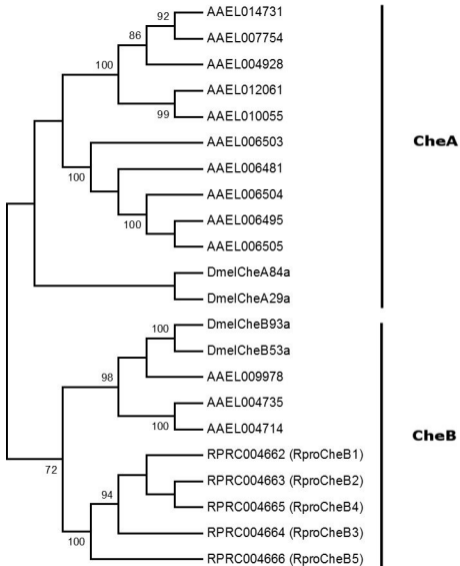

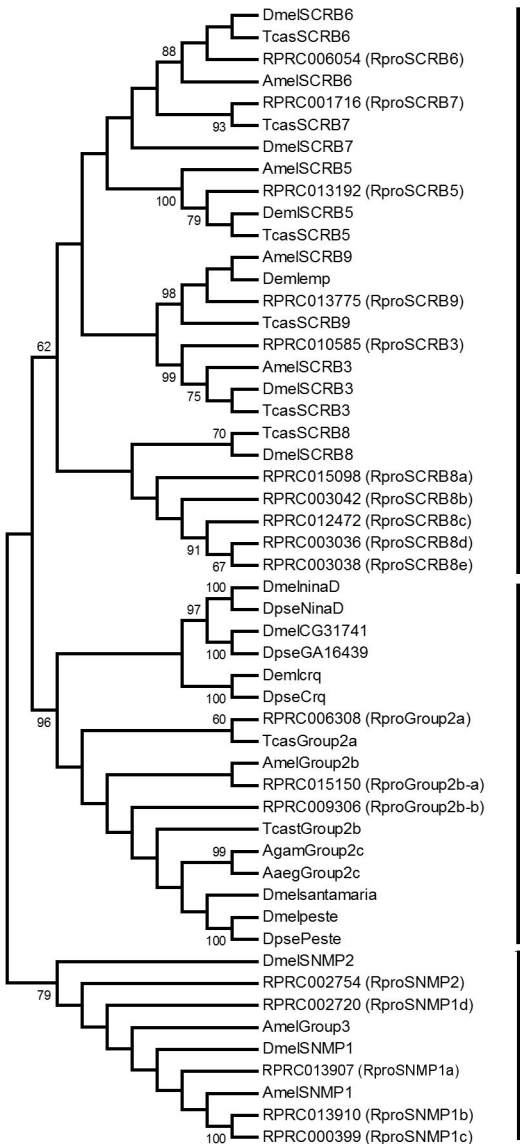

**Group 1**

**Group 2**

**Group 3**

- DmelSCRB6
- TcasSCRB6
- RPRC006054 (RproSCRB6)
- AmelSCRB6
- RPRC001716 (RproSCRB7)
- TcasSCRB7
- DmelSCRB7
- AmelSCRB5
- RPRC013192 (RproSCRB5)
- DemSCRB5
- TcasSCRB5
- AmelSCRB9
- Demlemp
- RPRC013775 (RproSCRB9)
- TcasSCRB9
- RPRC010585 (RproSCRB3)
- AmelSCRB3
- DmelSCRB3
- TcasSCRB3
- TcasSCRB8
- DmelSCRB8
- RPRC015098 (RproSCRB8a)
- RPRC003042 (RproSCRB8b)
- RPRC012472 (RproSCRB8c)
- RPRC003036 (RproSCRB8d)
- RPRC003038 (RproSCRB8e)
- DmelNinaD
- DpseNinaD
- DmelCG31741
- DpseGA16439
- Demlcrq
- DpseCrq
- RPRC006308 (RproGroup2a)
- TcasGroup2a
- AmelGroup2b
- RPRC015150 (RproGroup2b-a)
- RPRC009306 (RproGroup2b-b)
- TcastGroup2b
- AgamGroup2c
- AaegGroup2c
- Dmelsantamaria
- Dmelpeste
- DpsePeste
- DmelSNMP2
- RPRC002754 (RproSNMP2)
- RPRC002720 (RproSNMP1d)
- AmelGroup3
- DmelSNMP1
- RPRC013907 (RproSNMP1a)
- AmelSNMP1
- RPRC013910 (RproSNMP1b)
- RPRC000399 (RproSNMP1c)









**a**

RPRC012523  
 RPRC003733  
 RPRC014623  
 RPRC010263  
 RPRC003566  
 RPRC010259  
 RPRC010265  
 RPRC014627  
 RPRC004681  
 RPRC003620

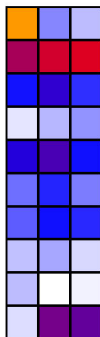

L F M

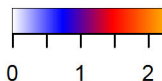Log<sub>10</sub> FPKM+1**b**

CYP3093A2  
 CYP3093A7  
 CYP3093A8  
 CYP3097A9  
 CYP417a  
 CYP4a  
 CYP4c  
 CYP4C75  
 CYP4d  
 CYP4e  
 CYP4EM3  
 CYP4EM6  
 CYP4f  
 CYP4g  
 CYP4gg  
 CYP4h  
 CYP4i  
 CYP4p  
 CYP4t  
 CYP4u  
 CYP4v  
 CYP4y

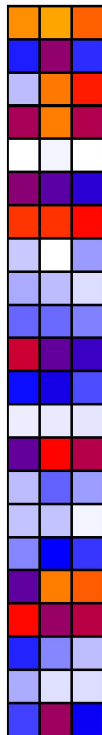

L F M

qRT-PCR transcript abundance

Larvae vs. Female antennae

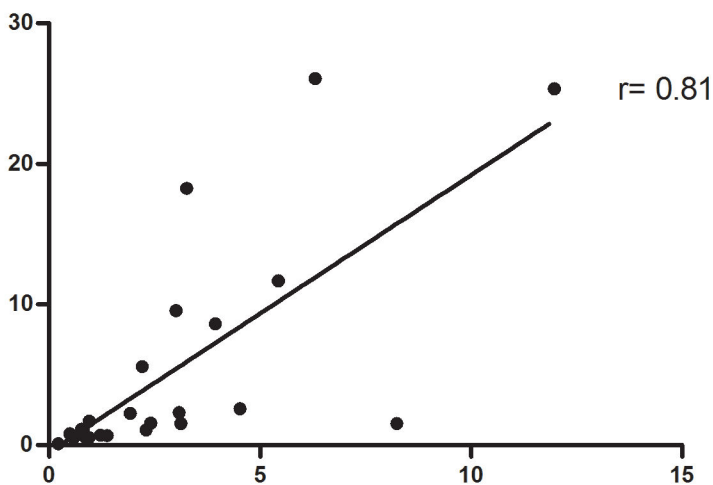

Larvae vs. Male antennae

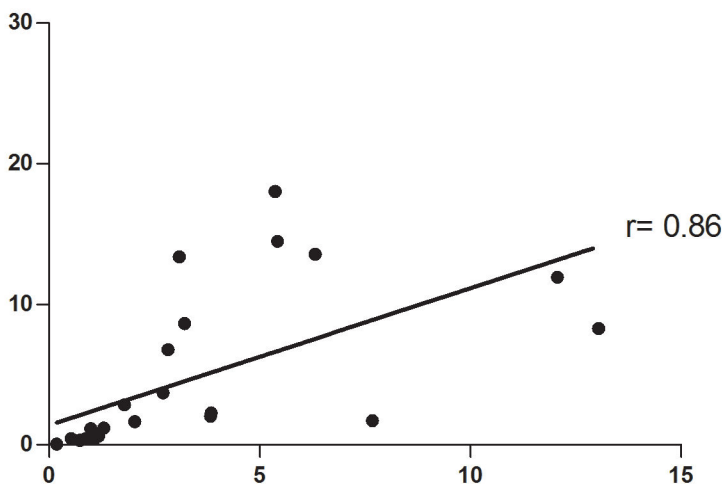

Male vs. female antennae

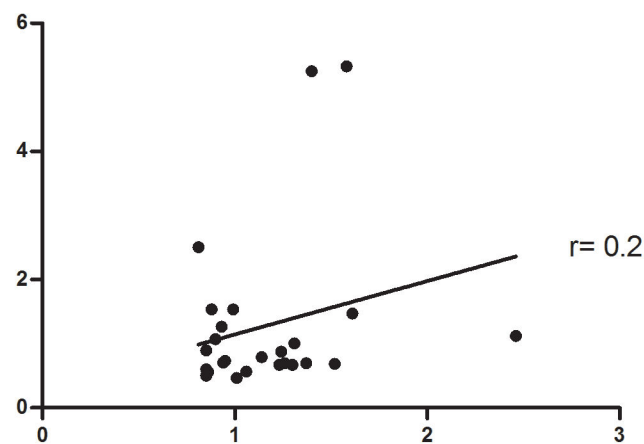

RNA-Seq transcript abundance

**Table S1– GO annotation terms for enriched transcripts in each library.** Only those transcripts with an FPKM value >1000 were included in the functional enrichment analysis of each library. (\*) P: Biological process, F: Molecular function and C: Cellular component; D.E: differentially expressed.

### GO annotation terms for enriched transcripts in larval library

| GO-ID      | Term                                   | Category* | FDR      | P-Value  | N° of genes in dataset D.E. | N° of genes in <i>R. prolixus</i> genome | Over/Under represented | VectorBase code of genes dataset D.E.                                                                                                                                                                                                                                                                                                                                                                                                                                                                                                                                                                                                                                                                                                                                              | VectorBase code of genes in <i>R. prolixus</i> genome                                                                                                                                                                                                                                                                                                      |
|------------|----------------------------------------|-----------|----------|----------|-----------------------------|------------------------------------------|------------------------|------------------------------------------------------------------------------------------------------------------------------------------------------------------------------------------------------------------------------------------------------------------------------------------------------------------------------------------------------------------------------------------------------------------------------------------------------------------------------------------------------------------------------------------------------------------------------------------------------------------------------------------------------------------------------------------------------------------------------------------------------------------------------------|------------------------------------------------------------------------------------------------------------------------------------------------------------------------------------------------------------------------------------------------------------------------------------------------------------------------------------------------------------|
| GO:0003735 | structural constituent of ribosome     | F         | 2.26E-69 | 3.84E-73 | 63                          | 29                                       | over                   | RPRC012633, RPRC010853, RPRC003327, RPRC009716, RPRC012784, RPRC004269, RPRC013146, RPRC002520, RPRC007451, RPRC002698, RPRC010146, RPRC003768, RPRC014587, RPRC009189, RPRC013169, RPRC007328, RPRC013077, RPRC007856, RPRC012158, RPRC010378, RPRC012542, RPRC005701, RPRC010286, RPRC014419, RPRC003510, RPRC005980, RPRC014363, RPRC005724, RPRC012711, RPRC002544, RPRC006329, RPRC005430, RPRC002470, RPRC013786, RPRC009702, RPRC013851, RPRC011260, RPRC006974, RPRC011456, RPRC014620, RPRC013371, RPRC014845, RPRC011937, RPRC009337, RPRC012162, RPRC012353, RPRC012387, RPRC011596, RPRC002869, RPRC005389, RPRC013504, RPRC013167, RPRC002923, RPRC015127, RPRC015001, RPRC010405, RPRC007825, RPRC010192, RPRC000499, RPRC012354, RPRC006392, RPRC007230, RPRC006309 | RPRC008799, RPRC014365, RPRC002822, RPRC009039, RPRC004296, RPRC011999, RPRC015409, RPRC012941, RPRC002505, RPRC012363, RPRC000922, RPRC006118, RPRC014793, RPRC006758, RPRC008479, RPRC010054, RPRC000972, RPRC003014, RPRC005011, RPRC009871, RPRC012072, RPRC006051, RPRC010872, RPRC003980, RPRC009873, RPRC002897, RPRC004303, RPRC001328, RPRC010809 |
| GO:0022627 | cytosolic small ribosomal subunit      | C         | 1.05E+02 | 7.86E-01 | 4                           | 0                                        | over                   | RPRC010146, RPRC013504, RPRC002923, RPRC000499                                                                                                                                                                                                                                                                                                                                                                                                                                                                                                                                                                                                                                                                                                                                     |                                                                                                                                                                                                                                                                                                                                                            |
| GO:0015986 | ATP synthesis coupled proton transport | P         | 1.53E+02 | 1.20E+00 | 5                           | 3                                        | over                   | RPRC012073, RPRC011931, RPRC008498, RPRC010550, RPRC005917                                                                                                                                                                                                                                                                                                                                                                                                                                                                                                                                                                                                                                                                                                                         | RPRC003410, RPRC008312, RPRC005494                                                                                                                                                                                                                                                                                                                         |
| GO:0005200 | structural constituent of cytoskeleton | F         | 3.29E+01 | 2.68E+00 | 6                           | 9                                        | over                   | RPRC003672, RPRC009875, RPRC005383, RPRC010283, RPRC007667, RPRC004762                                                                                                                                                                                                                                                                                                                                                                                                                                                                                                                                                                                                                                                                                                             | RPRC014380, RPRC014377, RPRC005328, RPRC011694, RPRC008372, RPRC008343, RPRC003842, RPRC015390, RPRC000816                                                                                                                                                                                                                                                 |

|            |                                                                 |   |          |          |    |    |      |                                                                                                                        |                                                                                                                                                                                                                                                                                                                                                                                                                                                                                                                                                                                                            |
|------------|-----------------------------------------------------------------|---|----------|----------|----|----|------|------------------------------------------------------------------------------------------------------------------------|------------------------------------------------------------------------------------------------------------------------------------------------------------------------------------------------------------------------------------------------------------------------------------------------------------------------------------------------------------------------------------------------------------------------------------------------------------------------------------------------------------------------------------------------------------------------------------------------------------|
| GO:0003924 | GTPase activity                                                 | F | 8.70E+02 | 7.98E+00 | 10 | 49 | over | RPRC012142, RPRC003672, RPRC005383, RPRC010283, RPRC007667, RPRC015041, RPRC014951, RPRC011075, RPRC012140, RPRC004762 | RPRC014380, RPRC013503, RPRC015134, RPRC004755, RPRC005628, RPRC011076, RPRC005457, RPRC014377, RPRC005906, RPRC013292, RPRC009003, RPRC011142, RPRC014184, RPRC008979, RPRC001144, RPRC001275, RPRC008122, RPRC001582, RPRC003793, RPRC011694, RPRC015352, RPRC009331, RPRC006970, RPRC007358, RPRC008372, RPRC001448, RPRC003416, RPRC000800, RPRC012714, RPRC003842, RPRC014240, RPRC006334, RPRC002143, RPRC005936, RPRC005351, RPRC003442, RPRC005505, RPRC013790, RPRC000348, RPRC004368, RPRC008854, RPRC013366, RPRC000816, RPRC015292, RPRC008666, RPRC002028, RPRC011274, RPRC012204, RPRC007250 |
| GO:0046933 | proton-transporting ATP synthase activity, rotational mechanism | F | 1.18E+03 | 1.12E+01 | 4  | 2  | over | RPRC012073, RPRC011931, RPRC008498, RPRC005917                                                                         | RPRC003410, RPRC005494                                                                                                                                                                                                                                                                                                                                                                                                                                                                                                                                                                                     |
| GO:0070062 | extracellular exosome                                           | C | 2.39E+03 | 2.44E+01 | 5  | 8  | over | RPRC008809, RPRC007515, RPRC001811, RPRC005383, RPRC012247                                                             | RPRC015027, RPRC012892, RPRC007468, RPRC009243, RPRC011182, RPRC006358, RPRC000881, RPRC000267                                                                                                                                                                                                                                                                                                                                                                                                                                                                                                             |
| GO:0019843 | rRNA binding                                                    | F | 4.40E+03 | 5.00E+01 | 4  | 4  | over | RPRC012633, RPRC012542, RPRC013371, RPRC011596                                                                         | RPRC006783, RPRC014793, RPRC008479, RPRC011272                                                                                                                                                                                                                                                                                                                                                                                                                                                                                                                                                             |
| GO:0005549 | odorant binding                                                 | F | 1.14E+04 | 1.43E+02 | 4  | 6  | over | RPRC000174, RPRC009905, RPRC010284, RPRC004407                                                                         | RPRC000274, RPRC000476, RPRC010357, RPRC000378, RPRC014985, RPRC004408                                                                                                                                                                                                                                                                                                                                                                                                                                                                                                                                     |
| GO:0051258 | protein polymerization                                          | P | 2.22E+01 | 3.17E+02 | 5  | 16 | over | RPRC003672, RPRC005383, RPRC010283, RPRC007667, RPRC004762                                                             | RPRC014380, RPRC011530, RPRC014377, RPRC011608, RPRC011142, RPRC013158, RPRC005737, RPRC005939, RPRC011694, RPRC011753, RPRC008372, RPRC004637, RPRC003842, RPRC003459, RPRC015390, RPRC000816                                                                                                                                                                                                                                                                                                                                                                                                             |

|            |                                        |   |          |          |    |     |      |                                                                                                                                                         |                                                                                                                                                                                                                                                                                                                                                                                                                                                                                                                                                                                                                                                                                                                                                                                                                                                                                                                                                                                                                                                                                                                                                                                                                                                                                                                                                                                                                                                                                                                                                               |
|------------|----------------------------------------|---|----------|----------|----|-----|------|---------------------------------------------------------------------------------------------------------------------------------------------------------|---------------------------------------------------------------------------------------------------------------------------------------------------------------------------------------------------------------------------------------------------------------------------------------------------------------------------------------------------------------------------------------------------------------------------------------------------------------------------------------------------------------------------------------------------------------------------------------------------------------------------------------------------------------------------------------------------------------------------------------------------------------------------------------------------------------------------------------------------------------------------------------------------------------------------------------------------------------------------------------------------------------------------------------------------------------------------------------------------------------------------------------------------------------------------------------------------------------------------------------------------------------------------------------------------------------------------------------------------------------------------------------------------------------------------------------------------------------------------------------------------------------------------------------------------------------|
| GO:0005525 | GTP binding                            | F | 3.17E+04 | 4.79E+02 | 12 | 118 | over | RPRC012142. RPRC015257. RPRC003672.<br>RPRC001811. RPRC005383. RPRC010283.<br>RPRC007667. RPRC015041. RPRC014951.<br>RPRC011075. RPRC012140. RPRC004762 | RPRC014380. RPRC011062. RPRC015453. RPRC013503.<br>RPRC015134. RPRC005498. RPRC008142. RPRC004755.<br>RPRC005852. RPRC013261. RPRC007642. RPRC005628.<br>RPRC011076. RPRC005457. RPRC003955. RPRC010209.<br>RPRC014377. RPRC010918. RPRC003772. RPRC006830.<br>RPRC013168. RPRC005906. RPRC013292. RPRC009003.<br>RPRC008853. RPRC012492. RPRC015391. RPRC013377.<br>RPRC007644. RPRC010913. RPRC010340. RPRC011142.<br>RPRC003248. RPRC003065. RPRC004007. RPRC007066.<br>RPRC005518. RPRC014184. RPRC008979. RPRC001144.<br>RPRC008553. RPRC010076. RPRC001275. RPRC014716.<br>RPRC008122. RPRC001582. RPRC003793. RPRC011694.<br>RPRC005832. RPRC011936. RPRC015352. RPRC009331.<br>RPRC006970. RPRC014014. RPRC009243. RPRC007358.<br>RPRC008372. RPRC001448. RPRC000800. RPRC012714.<br>RPRC010563. RPRC003842. RPRC015449. RPRC009576.<br>RPRC014240. RPRC008314. RPRC007034. RPRC005889.<br>RPRC006334. RPRC002143. RPRC007838. RPRC013286.<br>RPRC007643. RPRC007802. RPRC004106. RPRC014052.<br>RPRC004254. RPRC005936. RPRC005351. RPRC012940.<br>RPRC006938. RPRC009742. RPRC011124. RPRC003442.<br>RPRC002735. RPRC005505. RPRC013790. RPRC015125.<br>RPRC005482. RPRC005553. RPRC000348. RPRC004368.<br>RPRC006886. RPRC008854. RPRC003337. RPRC009223.<br>RPRC015392. RPRC013366. RPRC000816. RPRC011864.<br>RPRC013915. RPRC015292. RPRC004710. RPRC004646.<br>RPRC008666. RPRC014910. RPRC008081. RPRC014929.<br>RPRC002028. RPRC013508. RPRC011274. RPRC006184.<br>RPRC004629. RPRC012204. RPRC000267. RPRC003970.<br>RPRC003344. RPRC007250 |
| GO:0022625 | cytosolic large ribosomal subunit      | C | 5.45E+04 | 8.98E+02 | 2  | 0   | over | RPRC014620. RPRC015127                                                                                                                                  |                                                                                                                                                                                                                                                                                                                                                                                                                                                                                                                                                                                                                                                                                                                                                                                                                                                                                                                                                                                                                                                                                                                                                                                                                                                                                                                                                                                                                                                                                                                                                               |
| GO:0005874 | microtubule                            | C | 1.04E+04 | 1.84E+03 | 6  | 38  | over | RPRC003672. RPRC007515. RPRC005383.<br>RPRC010283. RPRC007667. RPRC004762                                                                               | RPRC014380. RPRC004943. RPRC011176. RPRC014377.<br>RPRC010393. RPRC013227. RPRC002789. RPRC004988.<br>RPRC011142. RPRC010423. RPRC014833. RPRC002641.<br>RPRC010968. RPRC005737. RPRC001777. RPRC006473.<br>RPRC011694. RPRC003935. RPRC004459. RPRC008372.<br>RPRC012400. RPRC005456. RPRC002928. RPRC011282.<br>RPRC003842. RPRC011177. RPRC015106. RPRC009316.<br>RPRC005789. RPRC001728. RPRC005417. RPRC015439.<br>RPRC010046. RPRC000816. RPRC004870. RPRC012381.<br>RPRC013987. RPRC001778                                                                                                                                                                                                                                                                                                                                                                                                                                                                                                                                                                                                                                                                                                                                                                                                                                                                                                                                                                                                                                                             |
| GO:0003746 | translation elongation factor activity | F | 1.18E+05 | 2.14E+03 | 4  | 15  | over | RPRC012142. RPRC007684. RPRC015041.<br>RPRC012140                                                                                                       | RPRC012040. RPRC012111. RPRC013273. RPRC011076.<br>RPRC009039. RPRC003914. RPRC007456. RPRC001582.<br>RPRC005473. RPRC011027. RPRC002143. RPRC005936.<br>RPRC002752. RPRC005351. RPRC011916                                                                                                                                                                                                                                                                                                                                                                                                                                                                                                                                                                                                                                                                                                                                                                                                                                                                                                                                                                                                                                                                                                                                                                                                                                                                                                                                                                   |
| GO:0006448 | regulation of translational elongation | P | 2.24E+05 | 5.22E+03 | 4  | 20  | over | RPRC012142. RPRC007684. RPRC015041.<br>RPRC012140                                                                                                       | RPRC012040. RPRC012111. RPRC013273. RPRC013273.<br>RPRC011076. RPRC009039. RPRC003914. RPRC015450.<br>RPRC007456. RPRC001582. RPRC005473. RPRC011027.<br>RPRC002143. RPRC005280. RPRC005936. RPRC002752.<br>RPRC005351. RPRC011916. RPRC012971. RPRC008081                                                                                                                                                                                                                                                                                                                                                                                                                                                                                                                                                                                                                                                                                                                                                                                                                                                                                                                                                                                                                                                                                                                                                                                                                                                                                                    |

---

|            |                    |   |          |          |   |     |       |            |
|------------|--------------------|---|----------|----------|---|-----|-------|------------|
| GO:0008233 | peptidase activity | F | 5.36E+05 | 1.46E+04 | 1 | 219 | under | RPRC006290 |
|------------|--------------------|---|----------|----------|---|-----|-------|------------|

RPRC009154. RPRC003097. RPRC003320. RPRC015015.  
RPRC009301. RPRC014463. RPRC014770. RPRC006557.  
RPRC010196. RPRC003168. RPRC001252. RPRC007074.  
RPRC011388. RPRC008278. RPRC013356. RPRC001240.  
RPRC012649. RPRC007157. RPRC012785. RPRC013734.  
RPRC012868. RPRC008963. RPRC012613. RPRC012920.  
RPRC003351. RPRC005414. RPRC015289. RPRC001944.  
RPRC010398. RPRC009977. RPRC002249. RPRC012513.  
RPRC001697. RPRC000913. RPRC013717. RPRC011176.  
RPRC000890. RPRC010309. RPRC000973. RPRC012508.  
RPRC009789. RPRC014294. RPRC008515. RPRC008037.  
RPRC013001. RPRC008587. RPRC013665. RPRC005262.  
RPRC006216. RPRC009127. RPRC010640. RPRC008989.  
RPRC004798. RPRC015124. RPRC010795. RPRC005321.  
RPRC009800. RPRC005067. RPRC006028. RPRC014950.  
RPRC012970. RPRC014407. RPRC002948. RPRC011018.  
RPRC006554. RPRC009294. RPRC008510. RPRC003153.  
RPRC008753. RPRC012487. RPRC007632. RPRC011066.  
RPRC013584. RPRC007692. RPRC013731. RPRC002919.  
RPRC003360. RPRC014196. RPRC014184. RPRC008099.  
RPRC002884. RPRC002310. RPRC014012. RPRC008063.  
RPRC011427. RPRC014338. RPRC010708. RPRC006644.  
RPRC000644. RPRC002696. RPRC000905. RPRC002377.  
RPRC015393. RPRC008831. RPRC008448. RPRC003155.  
RPRC008034. RPRC003864. RPRC012075. RPRC007220.  
RPRC000308. RPRC008253. RPRC002519. RPRC012465.  
RPRC000717. RPRC008082. RPRC014262. RPRC001796.  
RPRC007936. RPRC006929. RPRC001700. RPRC015288.  
RPRC002472. RPRC006917. RPRC003357. RPRC002798.  
RPRC003102. RPRC011748. RPRC010532. RPRC015188.  
RPRC011322. RPRC015323. RPRC007429. RPRC009226.  
RPRC001679. RPRC006558. RPRC010834. RPRC013528.  
RPRC008598. RPRC014045. RPRC009433. RPRC012786.  
RPRC008733. RPRC011672. RPRC006605. RPRC006753.  
RPRC010965. RPRC012212. RPRC005829. RPRC011129.  
RPRC006092. RPRC001372. RPRC002326. RPRC014897.  
RPRC006907. RPRC010280. RPRC005463. RPRC013126.  
RPRC004585. RPRC000405. RPRC013990. RPRC003247.  
RPRC002593. RPRC000886. RPRC003478. RPRC015385.  
RPRC000294. RPRC007479. RPRC011762. RPRC009595.  
RPRC004620. RPRC011379. RPRC013495. RPRC003708.  
RPRC009021. RPRC012374. RPRC000205. RPRC013009.  
RPRC012350. RPRC005322. RPRC007219. RPRC003608.  
RPRC001374. RPRC005405. RPRC009004. RPRC006898.  
RPRC014325. RPRC003668. RPRC004113. RPRC008281.  
RPRC009383. RPRC015415. RPRC007881. RPRC003230.  
RPRC010205. RPRC006957. RPRC000816. RPRC014468.  
RPRC003154. RPRC001652. RPRC003556. RPRC001747.  
RPRC003715. RPRC013661. RPRC007007. RPRC014699.  
RPRC013490. RPRC005596. RPRC005607. RPRC011776.  
RPRC003946. RPRC013732. RPRC015299. RPRC013349.  
RPRC011752. RPRC000219. RPRC014822. RPRC011433.  
RPRC004789. RPRC014810. RPRC009668. RPRC014173.  
RPRC010407. RPRC009349. RPRC009720. RPRC006893.  
RPRC014013. RPRC003090. RPRC000107

---

|            |                                                                             |   |          |          |   |    |      |                                    |                                                                                                                                                                                                                                    |
|------------|-----------------------------------------------------------------------------|---|----------|----------|---|----|------|------------------------------------|------------------------------------------------------------------------------------------------------------------------------------------------------------------------------------------------------------------------------------|
| GO:0000910 | cytokinesis                                                                 | P | 5.44E+05 | 2.23E+04 | 2 | 6  | over | RPRC007515. RPRC009875             | RPRC006338. RPRC010698. RPRC003092. RPRC000800. RPRC007538. RPRC009554                                                                                                                                                             |
| GO:0008061 | chitin binding                                                              | F | 5.44E+05 | 2.70E+04 | 3 | 19 | over | RPRC000381. RPRC013059. RPRC000042 | RPRC010255. RPRC004089. RPRC003005. RPRC005523. RPRC014196. RPRC008641. RPRC008796. RPRC014976. RPRC002707. RPRC009212. RPRC010254. RPRC000663. RPRC013840. RPRC007943. RPRC012296. RPRC001762. RPRC001569. RPRC010253. RPRC014929 |
| GO:0005125 | cytokine activity                                                           | F | 5.44E+05 | 3.01E+03 | 1 | 0  | over | RPRC002698                         |                                                                                                                                                                                                                                    |
| GO:0006892 | post-Golgi vesicle-mediated transport                                       | P | 5.44E+05 | 3.01E+03 | 1 | 0  | over | RPRC014951                         |                                                                                                                                                                                                                                    |
| GO:0000275 | mitochondrial proton-transporting ATP synthase complex, catalytic core F(1) | C | 5.44E+05 | 3.01E+03 | 1 | 0  | over | RPRC012073                         |                                                                                                                                                                                                                                    |
| GO:0035690 | cellular response to drug                                                   | P | 5.44E+05 | 3.01E+03 | 1 | 0  | over | RPRC007515                         |                                                                                                                                                                                                                                    |
| GO:0043274 | phospholipase binding                                                       | F | 5.44E+05 | 3.01E+03 | 1 | 0  | over | RPRC007515                         |                                                                                                                                                                                                                                    |
| GO:0001837 | epithelial to mesenchymal transition                                        | P | 5.44E+05 | 3.01E+03 | 1 | 0  | over | RPRC007515                         |                                                                                                                                                                                                                                    |
| GO:0055117 | regulation of cardiac muscle contraction                                    | P | 5.44E+05 | 3.01E+03 | 1 | 0  | over | RPRC007515                         |                                                                                                                                                                                                                                    |
| GO:0000028 | ribosomal small subunit assembly                                            | P | 5.44E+05 | 3.01E+03 | 1 | 0  | over | RPRC000499                         |                                                                                                                                                                                                                                    |
| GO:0060079 | regulation of excitatory postsynaptic membrane potential                    | P | 5.44E+05 | 3.01E+03 | 1 | 0  | over | RPRC007515                         |                                                                                                                                                                                                                                    |
| GO:0003958 | NADPH-hemoprotein reductase activity                                        | F | 5.44E+05 | 3.01E+03 | 1 | 0  | over | RPRC005729                         |                                                                                                                                                                                                                                    |
| GO:0015886 | heme transport                                                              | P | 5.44E+05 | 3.01E+03 | 1 | 0  | over | RPRC009283                         |                                                                                                                                                                                                                                    |
| GO:0043024 | ribosomal small subunit binding                                             | F | 5.44E+05 | 3.01E+03 | 1 | 0  | over | RPRC001811                         |                                                                                                                                                                                                                                    |
| GO:0010992 | ubiquitin homeostasis                                                       | P | 5.44E+05 | 3.01E+03 | 1 | 0  | over | RPRC012247                         |                                                                                                                                                                                                                                    |
| GO:0033192 | calmodulin-dependent protein phosphatase activity                           | F | 5.44E+05 | 3.01E+03 | 1 | 0  | over | RPRC007515                         |                                                                                                                                                                                                                                    |
| GO:0006407 | rRNA export from nucleus                                                    | P | 5.44E+05 | 3.01E+03 | 1 | 0  | over | RPRC010146                         |                                                                                                                                                                                                                                    |
| GO:0033173 | calcineurin-NFAT signaling cascade                                          | P | 5.44E+05 | 3.01E+03 | 1 | 0  | over | RPRC007515                         |                                                                                                                                                                                                                                    |
| GO:0035307 | positive regulation of protein dephosphorylation                            | P | 5.44E+05 | 3.01E+03 | 1 | 0  | over | RPRC007515                         |                                                                                                                                                                                                                                    |
| GO:0001569 | patterning of blood vessels                                                 | P | 5.44E+05 | 3.01E+03 | 1 | 0  | over | RPRC007515                         |                                                                                                                                                                                                                                    |
| GO:0010880 | regulation of release of sequestered calcium ion into cytosol by            | P | 5.44E+05 | 3.01E+03 | 1 | 0  | over | RPRC007515                         |                                                                                                                                                                                                                                    |



|            |                                                                     |   |          |          |   |   |      |            |  |
|------------|---------------------------------------------------------------------|---|----------|----------|---|---|------|------------|--|
|            | sarcoplasmic reticulum                                              |   |          |          |   |   |      |            |  |
| GO:0071333 | cellular response to glucose stimulus                               | P | 5.44E+05 | 3.01E+03 | 1 | 0 | over | RPRC007515 |  |
| GO:0008537 | proteasome activator complex                                        | C | 5.44E+05 | 3.01E+03 | 1 | 0 | over | RPRC009319 |  |
| GO:0006336 | DNA replication-independent nucleosome assembly                     | P | 5.44E+05 | 3.01E+03 | 1 | 0 | over | RPRC008809 |  |
| GO:0042383 | sarcolemma                                                          | C | 5.44E+05 | 3.01E+03 | 1 | 0 | over | RPRC007515 |  |
| GO:0032587 | ruffle membrane                                                     | C | 5.44E+05 | 3.01E+03 | 1 | 0 | over | RPRC001811 |  |
| GO:0032516 | positive regulation of phosphoprotein phosphatase activity          | P | 5.44E+05 | 3.01E+03 | 1 | 0 | over | RPRC007515 |  |
| GO:0046676 | negative regulation of insulin secretion                            | P | 5.44E+05 | 3.01E+03 | 1 | 0 | over | RPRC007515 |  |
| GO:0031997 | N-terminal myristoylation domain binding                            | F | 5.44E+05 | 3.01E+03 | 1 | 0 | over | RPRC007515 |  |
| GO:0031996 | thioesterase binding                                                | F | 5.44E+05 | 3.01E+03 | 1 | 0 | over | RPRC007515 |  |
| GO:0031932 | TORC2 complex                                                       | C | 5.44E+05 | 3.01E+03 | 1 | 0 | over | RPRC012706 |  |
| GO:0031929 | TOR signaling                                                       | P | 5.44E+05 | 3.01E+03 | 1 | 0 | over | RPRC012706 |  |
| GO:0015439 | heme-transporting ATPase activity                                   | F | 5.44E+05 | 3.01E+03 | 1 | 0 | over | RPRC009283 |  |
| GO:0048741 | skeletal muscle fiber development                                   | P | 5.44E+05 | 3.01E+03 | 1 | 0 | over | RPRC007515 |  |
| GO:0000788 | nuclear nucleosome                                                  | C | 5.44E+05 | 3.01E+03 | 1 | 0 | over | RPRC008809 |  |
| GO:0005513 | detection of calcium ion                                            | P | 5.44E+05 | 3.01E+03 | 1 | 0 | over | RPRC007515 |  |
| GO:0014883 | transition between fast and slow fiber                              | P | 5.44E+05 | 3.01E+03 | 1 | 0 | over | RPRC007515 |  |
| GO:0045955 | negative regulation of calcium ion-dependent exocytosis             | P | 5.44E+05 | 3.01E+03 | 1 | 0 | over | RPRC007515 |  |
| GO:0051343 | positive regulation of cyclic-nucleotide phosphodiesterase activity | P | 5.44E+05 | 3.01E+03 | 1 | 0 | over | RPRC007515 |  |
| GO:0009882 | blue light photoreceptor activity                                   | F | 5.44E+05 | 3.01E+03 | 1 | 0 | over | RPRC005966 |  |
| GO:0051298 | centrosome duplication                                              | P | 5.44E+05 | 3.01E+03 | 1 | 0 | over | RPRC015127 |  |
| GO:1902036 | regulation of hematopoietic stem cell differentiation               | P | 5.44E+05 | 3.01E+03 | 1 | 0 | over | RPRC014951 |  |
| GO:0009785 | blue light signaling pathway                                        | P | 5.44E+05 | 3.01E+03 | 1 | 0 | over | RPRC005966 |  |
| GO:0072542 | protein phosphatase                                                 | F | 5.44E+05 | 3.01E+03 | 1 | 0 | over | RPRC007515 |  |

| activator activity |                                                                             |   |          |          |   |   |      |            |
|--------------------|-----------------------------------------------------------------------------|---|----------|----------|---|---|------|------------|
| GO:0007595         | lactation                                                                   | P | 5.44E+05 | 3.01E+03 | 1 | 0 | over | RPRC001811 |
| GO:0004838         | L-tyrosine:2-oxoglutarate aminotransferase activity                         | F | 5.44E+05 | 3.01E+03 | 1 | 0 | over | RPRC000370 |
| GO:0021762         | substantia nigra development                                                | P | 5.44E+05 | 3.01E+03 | 1 | 0 | over | RPRC007515 |
| GO:0060487         | lung epithelial cell differentiation                                        | P | 5.44E+05 | 3.01E+03 | 1 | 0 | over | RPRC007515 |
| GO:0050679         | positive regulation of epithelial cell proliferation                        | P | 5.44E+05 | 3.01E+03 | 1 | 0 | over | RPRC001811 |
| GO:0071949         | FAD binding                                                                 | F | 5.44E+05 | 3.01E+03 | 1 | 0 | over | RPRC005966 |
| GO:0031492         | nucleosomal DNA binding                                                     | F | 5.44E+05 | 3.01E+03 | 1 | 0 | over | RPRC008809 |
| GO:0031432         | titin binding                                                               | F | 5.44E+05 | 3.01E+03 | 1 | 0 | over | RPRC007515 |
| GO:0060316         | positive regulation of ryanodine-sensitive calcium-release channel activity | P | 5.44E+05 | 3.01E+03 | 1 | 0 | over | RPRC007515 |

|            |                                                           |   |          |          |   |     |       |                        |                                                                                                                                                                                                                                                                                                                                                                                                                                                                                                                                                                                                                                                                                                                                                                                                                                                                                                                                                                                                                                                                                                                                                                                                                                                                                                                                                                                                                                                                                                                                                                                                                                                                                                                                                                                                                                                                                                                                                                                                                                                                                                                                                                                                                                                                                                                                                                                                                                                                                                                                       |
|------------|-----------------------------------------------------------|---|----------|----------|---|-----|-------|------------------------|---------------------------------------------------------------------------------------------------------------------------------------------------------------------------------------------------------------------------------------------------------------------------------------------------------------------------------------------------------------------------------------------------------------------------------------------------------------------------------------------------------------------------------------------------------------------------------------------------------------------------------------------------------------------------------------------------------------------------------------------------------------------------------------------------------------------------------------------------------------------------------------------------------------------------------------------------------------------------------------------------------------------------------------------------------------------------------------------------------------------------------------------------------------------------------------------------------------------------------------------------------------------------------------------------------------------------------------------------------------------------------------------------------------------------------------------------------------------------------------------------------------------------------------------------------------------------------------------------------------------------------------------------------------------------------------------------------------------------------------------------------------------------------------------------------------------------------------------------------------------------------------------------------------------------------------------------------------------------------------------------------------------------------------------------------------------------------------------------------------------------------------------------------------------------------------------------------------------------------------------------------------------------------------------------------------------------------------------------------------------------------------------------------------------------------------------------------------------------------------------------------------------------------------|
| GO:0006468 | protein phosphorylation                                   | P | 5.78E+05 | 3.24E+04 | 1 | 203 | under | RPRC000798             | RPRC000167. RPRC007014. RPRC001021. RPRC014610. RPRC014789. RPRC001666. RPRC015063. RPRC002513. RPRC014924. RPRC001790. RPRC004860. RPRC003853. RPRC006286. RPRC012318. RPRC005491. RPRC003777. RPRC012932. RPRC010391. RPRC007535. RPRC004772. RPRC008485. RPRC012856. RPRC001637. RPRC002018. RPRC013487. RPRC005633. RPRC000333. RPRC004767. RPRC013865. RPRC002851. RPRC000321. RPRC009634. RPRC006659. RPRC008054. RPRC011471. RPRC008213. RPRC007813. RPRC005852. RPRC000961. RPRC001330. RPRC013013. RPRC004886. RPRC011932. RPRC012556. RPRC003051. RPRC011920. RPRC001792. RPRC008734. RPRC005019. RPRC012934. RPRC004319. RPRC015112. RPRC007939. RPRC001692. RPRC008168. RPRC004857. RPRC015100. RPRC012994. RPRC001149. RPRC007035. RPRC007915. RPRC007732. RPRC000839. RPRC009931. RPRC004881. RPRC003862. RPRC013175. RPRC011946. RPRC015450. RPRC006442. RPRC000863. RPRC014526. RPRC008334. RPRC013655. RPRC011910. RPRC013400. RPRC010713. RPRC011822. RPRC011917. RPRC001610. RPRC007432. RPRC010785. RPRC006668. RPRC008636. RPRC008784. RPRC006390. RPRC015014. RPRC002282. RPRC001741. RPRC012099. RPRC013105. RPRC012489. RPRC002914. RPRC014191. RPRC014923. RPRC009431. RPRC000699. RPRC007546. RPRC014676. RPRC009184. RPRC008241. RPRC005266. RPRC008336. RPRC005349. RPRC006894. RPRC011919. RPRC014321. RPRC002957. RPRC004754. RPRC007812. RPRC012412. RPRC011796. RPRC013036. RPRC006941. RPRC000736. RPRC004483. RPRC005095. RPRC012077. RPRC012957. RPRC002438. RPRC001555. RPRC007441. RPRC001141. RPRC012200. RPRC007991. RPRC009026. RPRC006251. RPRC003276. RPRC011265. RPRC009002. RPRC006429. RPRC006577. RPRC001750. RPRC013126. RPRC006860. RPRC002309. RPRC013778. RPRC014223. RPRC007336. RPRC000814. RPRC010180. RPRC012179. RPRC007631. RPRC006548. RPRC004230. RPRC006377. RPRC000862. RPRC002038. RPRC013495. RPRC003442. RPRC001940. RPRC010394. RPRC007591. RPRC005800. RPRC008233. RPRC001693. RPRC011502. RPRC010636. RPRC001226. RPRC007981. RPRC003744. RPRC015332. RPRC002559. RPRC010134. RPRC001286. RPRC004208. RPRC008854. RPRC007119. RPRC005317. RPRC001031. RPRC012588. RPRC010991. RPRC014715. RPRC015085. RPRC004344. RPRC001740. RPRC000881. RPRC013601. RPRC014787. RPRC001102. RPRC003727. RPRC004097. RPRC015156. RPRC006467. RPRC011545. RPRC009939. RPRC000864. RPRC007788. RPRC006124. RPRC009342. RPRC013497. RPRC004717. RPRC013140. RPRC011911. RPRC006207. RPRC004705. RPRC001221. RPRC003273. RPRC000184-PB. RPRC000184. RPRC011516. RPRC008406. RPRC006669 |
| GO:0046961 | proton-transporting ATPase activity, rotational mechanism | F | 6.04E+05 | 3.45E+04 | 2 | 8   | over  | RPRC012073. RPRC008498 | RPRC003694. RPRC003410. RPRC002938. RPRC008833. RPRC007341. RPRC005494. RPRC009992. RPRC003113                                                                                                                                                                                                                                                                                                                                                                                                                                                                                                                                                                                                                                                                                                                                                                                                                                                                                                                                                                                                                                                                                                                                                                                                                                                                                                                                                                                                                                                                                                                                                                                                                                                                                                                                                                                                                                                                                                                                                                                                                                                                                                                                                                                                                                                                                                                                                                                                                                        |

|            |                              |   |          |          |   |     |       |                                    |                                                                                                                                                                                                                                                                                                                                                                                                                                                                                                                                                                                                                                                                                                                                                                                                                                                                                                                                                                                                                                                                                                                                                                                                                                                                                                                                                                                                                                                                                                                                                                                                                                                                                                                                                                                                                                                                                                                                                                                                                                                                                                                                                                                                                                                                                                                                                                                                                                                                                                                                                                                                                                                                                                                                                                                                                                                                                                                                                                         |
|------------|------------------------------|---|----------|----------|---|-----|-------|------------------------------------|-------------------------------------------------------------------------------------------------------------------------------------------------------------------------------------------------------------------------------------------------------------------------------------------------------------------------------------------------------------------------------------------------------------------------------------------------------------------------------------------------------------------------------------------------------------------------------------------------------------------------------------------------------------------------------------------------------------------------------------------------------------------------------------------------------------------------------------------------------------------------------------------------------------------------------------------------------------------------------------------------------------------------------------------------------------------------------------------------------------------------------------------------------------------------------------------------------------------------------------------------------------------------------------------------------------------------------------------------------------------------------------------------------------------------------------------------------------------------------------------------------------------------------------------------------------------------------------------------------------------------------------------------------------------------------------------------------------------------------------------------------------------------------------------------------------------------------------------------------------------------------------------------------------------------------------------------------------------------------------------------------------------------------------------------------------------------------------------------------------------------------------------------------------------------------------------------------------------------------------------------------------------------------------------------------------------------------------------------------------------------------------------------------------------------------------------------------------------------------------------------------------------------------------------------------------------------------------------------------------------------------------------------------------------------------------------------------------------------------------------------------------------------------------------------------------------------------------------------------------------------------------------------------------------------------------------------------------------------|
| GO:0006351 | transcription. DNA-templated | P | 6.08E+05 | 3.49E+04 | 3 | 299 | under | RPRC007515. RPRC001993. RPRC000303 | RPRC001204. RPRC001595. RPRC015417. RPRC003870.<br>RPRC004092. RPRC009544. RPRC013615. RPRC009946.<br>RPRC015246. RPRC013846. RPRC003475. RPRC014120.<br>RPRC011695. RPRC000954. RPRC012076. RPRC011535.<br>RPRC010976. RPRC005757. RPRC009929. RPRC007388.<br>RPRC015365. RPRC012040. RPRC005005. RPRC007842.<br>RPRC008887. RPRC001701. RPRC001318. RPRC010462.<br>RPRC005391. RPRC001625. RPRC014334. RPRC005645.<br>RPRC012111. RPRC000026. RPRC002066. RPRC003748.<br>RPRC007347. RPRC006647. RPRC005947. RPRC011554.<br>RPRC001915. RPRC007801. RPRC003819. RPRC010274.<br>RPRC003712. RPRC000737. RPRC005100. RPRC002527.<br>RPRC000133. RPRC003051. RPRC001899. RPRC011283.<br>RPRC006459. RPRC008085. RPRC002817. RPRC003110.<br>RPRC000583-PB. RPRC000583. RPRC006116. RPRC000264.<br>RPRC002475. RPRC009163. RPRC001680. RPRC002941.<br>RPRC002220. RPRC010293. RPRC006801. RPRC010281.<br>RPRC007266. RPRC015255. RPRC009234. RPRC001910.<br>RPRC011792. RPRC009636. RPRC011887. RPRC003791.<br>RPRC003886. RPRC008192. RPRC001515. RPRC006478.<br>RPRC012392. RPRC012403. RPRC015314. RPRC000951.<br>RPRC009536. RPRC004402. RPRC014602. RPRC010188.<br>RPRC006844. RPRC009755. RPRC015055. RPRC005264.<br>RPRC002505. RPRC001794. RPRC007468. RPRC014514.<br>RPRC014662. RPRC010885. RPRC005973. RPRC002577.<br>RPRC007456. RPRC006183. RPRC008087. RPRC008489.<br>RPRC000437. RPRC015114. RPRC008075. RPRC009962.<br>RPRC008636. RPRC015186. RPRC010625. RPRC011161.<br>RPRC007344. RPRC004528. RPRC005785. RPRC007025.<br>RPRC004262. RPRC007173. RPRC000230. RPRC001180.<br>RPRC001127. RPRC001996. RPRC005932. RPRC012907.<br>RPRC007256. RPRC012429. RPRC003072. RPRC005920.<br>RPRC007244. RPRC002110. RPRC004883. RPRC012003.<br>RPRC007327. RPRC005673. RPRC012796. RPRC005188.<br>RPRC001429. RPRC005513. RPRC012700. RPRC005176.<br>RPRC003374. RPRC003681. RPRC007546. RPRC001967.<br>RPRC003362. RPRC000853. RPRC009438. RPRC007458.<br>RPRC010875. RPRC000936. RPRC012843. RPRC001317.<br>RPRC014174. RPRC011665. RPRC007032. RPRC000587.<br>RPRC006332. RPRC000025. RPRC003823. RPRC011027.<br>RPRC000900. RPRC006499. RPRC001122. RPRC004754.<br>RPRC003811. RPRC001058. RPRC001938. RPRC007824.<br>RPRC013788. RPRC008212. RPRC007346. RPRC002774.<br>RPRC000824. RPRC001205. RPRC008698. RPRC007334.<br>RPRC015259. RPRC003002. RPRC010273. RPRC002750.<br>RPRC007565. RPRC002845. RPRC009521. RPRC000239.<br>RPRC009923. RPRC013000. RPRC013664. RPRC010332.<br>RPRC001336. RPRC005261. RPRC002414. RPRC003216.<br>RPRC006848. RPRC008243. RPRC011448. RPRC013416.<br>RPRC005006. RPRC001236. RPRC004868. RPRC011914.<br>RPRC012136. RPRC009026. RPRC002486. RPRC014104.<br>RPRC007938. RPRC008019. RPRC010782. RPRC006092.<br>RPRC002781. RPRC000767. RPRC009416. RPRC011667.<br>RPRC003985. RPRC005805. RPRC001614. RPRC015106.<br>RPRC002693. RPRC010841. RPRC011791. RPRC012172.<br>RPRC006151. RPRC006405. RPRC010617. RPRC003790. |
|------------|------------------------------|---|----------|----------|---|-----|-------|------------------------------------|-------------------------------------------------------------------------------------------------------------------------------------------------------------------------------------------------------------------------------------------------------------------------------------------------------------------------------------------------------------------------------------------------------------------------------------------------------------------------------------------------------------------------------------------------------------------------------------------------------------------------------------------------------------------------------------------------------------------------------------------------------------------------------------------------------------------------------------------------------------------------------------------------------------------------------------------------------------------------------------------------------------------------------------------------------------------------------------------------------------------------------------------------------------------------------------------------------------------------------------------------------------------------------------------------------------------------------------------------------------------------------------------------------------------------------------------------------------------------------------------------------------------------------------------------------------------------------------------------------------------------------------------------------------------------------------------------------------------------------------------------------------------------------------------------------------------------------------------------------------------------------------------------------------------------------------------------------------------------------------------------------------------------------------------------------------------------------------------------------------------------------------------------------------------------------------------------------------------------------------------------------------------------------------------------------------------------------------------------------------------------------------------------------------------------------------------------------------------------------------------------------------------------------------------------------------------------------------------------------------------------------------------------------------------------------------------------------------------------------------------------------------------------------------------------------------------------------------------------------------------------------------------------------------------------------------------------------------------------|

|            |                                                                           |   |          |          |   |    |      |                                    |                                                                                                                                                                                                                                                                                                                                                                                                                                                                                                                                                                                                                                                                                                                                                                                                                                                                                                                                    |
|------------|---------------------------------------------------------------------------|---|----------|----------|---|----|------|------------------------------------|------------------------------------------------------------------------------------------------------------------------------------------------------------------------------------------------------------------------------------------------------------------------------------------------------------------------------------------------------------------------------------------------------------------------------------------------------------------------------------------------------------------------------------------------------------------------------------------------------------------------------------------------------------------------------------------------------------------------------------------------------------------------------------------------------------------------------------------------------------------------------------------------------------------------------------|
|            |                                                                           |   |          |          |   |    |      |                                    | RPRC003801. RPRC001598. RPRC011714. RPRC012964. RPRC009706. RPRC008357. RPRC010410. RPRC009766. RPRC009045. RPRC011455. RPRC000282. RPRC007691. RPRC004875. RPRC008747. RPRC015149. RPRC006660. RPRC009188. RPRC003111. RPRC011916. RPRC014254. RPRC013311. RPRC001852. RPRC001788. RPRC004922. RPRC006094. RPRC007981. RPRC012581. RPRC000496. RPRC002559. RPRC015268. RPRC007586. RPRC014154. RPRC007267. RPRC001031. RPRC012906. RPRC009064. RPRC000881. RPRC007000. RPRC010289. RPRC001186. RPRC005115. RPRC003461. RPRC015156. RPRC002606. RPRC010679. RPRC007940. RPRC009271. RPRC003703. RPRC004953. RPRC000455. RPRC012157. RPRC004327. RPRC014273. RPRC013330. RPRC006379. RPRC008411. RPRC001871. RPRC004156. RPRC005003. RPRC008737. RPRC002164. RPRC008152. RPRC005484. RPRC013325. RPRC006502. RPRC002968. RPRC011971. RPRC004936. RPRC007274. RPRC011345. RPRC015422. RPRC013620. RPRC004192. RPRC004351. RPRC014392 |
| GO:0006030 | chitin metabolic process                                                  | P | 6.46E+05 | 3.77E+04 | 3 | 22 | over | RPRC000381. RPRC013059. RPRC000042 | RPRC010255. RPRC015300. RPRC004089. RPRC003005. RPRC005523. RPRC014196. RPRC008641. RPRC008796. RPRC014976. RPRC002707. RPRC009212. RPRC010254. RPRC011446. RPRC011263. RPRC000663. RPRC013840. RPRC007943. RPRC012296. RPRC001762. RPRC001569. RPRC010253. RPRC014929                                                                                                                                                                                                                                                                                                                                                                                                                                                                                                                                                                                                                                                             |
| GO:0033177 | proton-transporting two-sector ATPase complex. proton-transporting domain | C | 6.99E+05 | 4.13E+03 | 2 | 9  | over | RPRC006543. RPRC010550             | RPRC013834. RPRC005881. RPRC008403. RPRC015179. RPRC001199. RPRC008312. RPRC005989. RPRC007426. RPRC001198                                                                                                                                                                                                                                                                                                                                                                                                                                                                                                                                                                                                                                                                                                                                                                                                                         |
| GO:0019904 | protein domain specific binding                                           | F | 6.99E+05 | 4.13E+03 | 2 | 9  | over | RPRC007515. RPRC011742             | RPRC011237. RPRC011822. RPRC008500. RPRC003362. RPRC008219. RPRC001496. RPRC010679. RPRC013325. RPRC012128                                                                                                                                                                                                                                                                                                                                                                                                                                                                                                                                                                                                                                                                                                                                                                                                                         |

|            |                                      |   |          |          |   |     |       |                                                               |                                                                                                                                                                                                                                                                                                                                                                                                                                                                                                                                                                                                                                                                                                                                                                                                                                                                                                                                                                                                                                                                                                                                                                                                                                                                                                                                                                                                                                                                                                                                                                                                                                                                                                                                                                                                                                                                                                                                                                                                                                                                                                                                                                                                                                                                                                                                                                                                                                                                                                                                                                                                                                                                                                                                                                                                                                                                                                                                                                      |
|------------|--------------------------------------|---|----------|----------|---|-----|-------|---------------------------------------------------------------|----------------------------------------------------------------------------------------------------------------------------------------------------------------------------------------------------------------------------------------------------------------------------------------------------------------------------------------------------------------------------------------------------------------------------------------------------------------------------------------------------------------------------------------------------------------------------------------------------------------------------------------------------------------------------------------------------------------------------------------------------------------------------------------------------------------------------------------------------------------------------------------------------------------------------------------------------------------------------------------------------------------------------------------------------------------------------------------------------------------------------------------------------------------------------------------------------------------------------------------------------------------------------------------------------------------------------------------------------------------------------------------------------------------------------------------------------------------------------------------------------------------------------------------------------------------------------------------------------------------------------------------------------------------------------------------------------------------------------------------------------------------------------------------------------------------------------------------------------------------------------------------------------------------------------------------------------------------------------------------------------------------------------------------------------------------------------------------------------------------------------------------------------------------------------------------------------------------------------------------------------------------------------------------------------------------------------------------------------------------------------------------------------------------------------------------------------------------------------------------------------------------------------------------------------------------------------------------------------------------------------------------------------------------------------------------------------------------------------------------------------------------------------------------------------------------------------------------------------------------------------------------------------------------------------------------------------------------------|
| GO:0019752 | carboxylic acid<br>metabolic process | P | 7.19E+05 | 4.29E+04 | 5 | 385 | under | RPRC012101. RPRC000370. RPRC000798.<br>RPRC013371. RPRC012369 | RPRC015027. RPRC000509. RPRC001671. RPRC013946.<br>RPRC012423. RPRC007493. RPRC006550. RPRC000391.<br>RPRC002708. RPRC000167. RPRC003658. RPRC001276.<br>RPRC000633. RPRC003403. RPRC001021. RPRC015405.<br>RPRC001985. RPRC014789. RPRC009934. RPRC014948.<br>RPRC001666. RPRC003634. RPRC010184. RPRC015063.<br>RPRC002756. RPRC007783. RPRC004819. RPRC011281.<br>RPRC014924. RPRC001790. RPRC013492. RPRC007559.<br>RPRC003853. RPRC014180. RPRC006286. RPRC012318.<br>RPRC005491. RPRC005070. RPRC012932. RPRC010391.<br>RPRC011204. RPRC008242. RPRC000706. RPRC007535.<br>RPRC004772. RPRC008485. RPRC003924. RPRC012856.<br>RPRC009810. RPRC013965. RPRC013487. RPRC001371.<br>RPRC007045. RPRC012271. RPRC011985. RPRC014027.<br>RPRC007511. RPRC000830. RPRC011093. RPRC006747.<br>RPRC004365. RPRC006481. RPRC001708. RPRC004619.<br>RPRC000333. RPRC004767. RPRC000269. RPRC002851.<br>RPRC000321. RPRC004755. RPRC009634. RPRC006659.<br>RPRC013853. RPRC008054. RPRC011471. RPRC014329.<br>RPRC007654. RPRC002213. RPRC007813. RPRC005852.<br>RPRC007961. RPRC000961. RPRC003819. RPRC017364.<br>RPRC002846. RPRC001330. RPRC001266. RPRC004898.<br>RPRC009777. RPRC009522. RPRC006547. RPRC002420.<br>RPRC010918. RPRC011932. RPRC003317. RPRC012556.<br>RPRC011040. RPRC014110. RPRC003294. RPRC004312.<br>RPRC013824. RPRC004460. RPRC005262. RPRC006216.<br>RPRC001166. RPRC008734. RPRC003270. RPRC009972.<br>RPRC006997. RPRC012297. RPRC004319. RPRC013417.<br>RPRC007939. RPRC015196. RPRC000678. RPRC004709.<br>RPRC004857. RPRC004538. RPRC007035. RPRC007915.<br>RPRC001042. RPRC011497. RPRC011963. RPRC005878.<br>RPRC003507. RPRC007732. RPRC003241. RPRC011951.<br>RPRC005281. RPRC000720. RPRC004881. RPRC014626.<br>RPRC003862. RPRC005830. RPRC013175. RPRC003384.<br>RPRC015450. RPRC007958. RPRC004569. RPRC000863.<br>RPRC014526. RPRC011858. RPRC000123. RPRC015309.<br>RPRC007468. RPRC000366. RPRC012853. RPRC013655.<br>RPRC007934. RPRC007213. RPRC013484. RPRC009424.<br>RPRC010713. RPRC015369. RPRC011822. RPRC006023.<br>RPRC014669. RPRC010383. RPRC000751. RPRC008784.<br>RPRC010466. RPRC003650. RPRC006561. RPRC001056.<br>RPRC013543. RPRC012677. RPRC011161. RPRC006390.<br>RPRC000758. RPRC000810. RPRC002282. RPRC008684.<br>RPRC012027. RPRC008270. RPRC005454. RPRC000734.<br>RPRC005920. RPRC009774. RPRC015074. RPRC009709.<br>RPRC006225. RPRC000805. RPRC002914. RPRC011132.<br>RPRC014191. RPRC014923. RPRC002838. RPRC007546.<br>RPRC007705. RPRC014676. RPRC001246. RPRC013089.<br>RPRC012146. RPRC009184. RPRC008241. RPRC005266.<br>RPRC005880. RPRC002909. RPRC011848. RPRC007936.<br>RPRC008472. RPRC010727. RPRC001370. RPRC012270.<br>RPRC001317. RPRC010142. RPRC011103. RPRC006894.<br>RPRC009816. RPRC014321. RPRC002957. RPRC004447.<br>RPRC000741. RPRC011736. RPRC012986. RPRC000001.<br>RPRC011470. RPRC012572. RPRC007812. RPRC005059.<br>RPRC008762. RPRC008698. RPRC007907. RPRC013935. |
|------------|--------------------------------------|---|----------|----------|---|-----|-------|---------------------------------------------------------------|----------------------------------------------------------------------------------------------------------------------------------------------------------------------------------------------------------------------------------------------------------------------------------------------------------------------------------------------------------------------------------------------------------------------------------------------------------------------------------------------------------------------------------------------------------------------------------------------------------------------------------------------------------------------------------------------------------------------------------------------------------------------------------------------------------------------------------------------------------------------------------------------------------------------------------------------------------------------------------------------------------------------------------------------------------------------------------------------------------------------------------------------------------------------------------------------------------------------------------------------------------------------------------------------------------------------------------------------------------------------------------------------------------------------------------------------------------------------------------------------------------------------------------------------------------------------------------------------------------------------------------------------------------------------------------------------------------------------------------------------------------------------------------------------------------------------------------------------------------------------------------------------------------------------------------------------------------------------------------------------------------------------------------------------------------------------------------------------------------------------------------------------------------------------------------------------------------------------------------------------------------------------------------------------------------------------------------------------------------------------------------------------------------------------------------------------------------------------------------------------------------------------------------------------------------------------------------------------------------------------------------------------------------------------------------------------------------------------------------------------------------------------------------------------------------------------------------------------------------------------------------------------------------------------------------------------------------------------|

RPRC002762. RPRC015259. RPRC013036. RPRC007884.  
RPRC006941. RPRC006156. RPRC011234. RPRC004961.  
RPRC004483. RPRC003878. RPRC001496. RPRC004566.  
RPRC012077. RPRC006056. RPRC005261. RPRC012957.  
RPRC002438. RPRC000700. RPRC009433. RPRC006670.  
RPRC012065. RPRC008881. RPRC000617. RPRC010965.  
RPRC000605. RPRC009250. RPRC000689. RPRC007441.  
RPRC004466. RPRC001714. RPRC008402. RPRC009588.  
RPRC012200. RPRC001691. RPRC013393. RPRC007672.  
RPRC009014. RPRC003276. RPRC014028. RPRC011265.  
RPRC006919. RPRC011519. RPRC014790. RPRC007034.  
RPRC009002. RPRC000589. RPRC009404. RPRC006429.  
RPRC003666. RPRC012609. RPRC006015. RPRC015095.  
RPRC011336. RPRC005315. RPRC002704. RPRC007572.  
RPRC002067. RPRC008628. RPRC013126. RPRC004278.  
RPRC006310. RPRC000826. RPRC014478. RPRC015071.  
RPRC005280. RPRC014223. RPRC007336. RPRC013364.  
RPRC002286. RPRC005617. RPRC004644. RPRC006548.  
RPRC010103. RPRC004230. RPRC001255. RPRC006377.  
RPRC013423. RPRC000862. RPRC002038. RPRC003932.  
RPRC004556. RPRC009021. RPRC003283. RPRC001940.  
RPRC013009. RPRC010394. RPRC015125. RPRC015273.  
RPRC007591. RPRC005641. RPRC005800. RPRC005884.  
RPRC003927. RPRC008233. RPRC004858. RPRC005310.  
RPRC005553. RPRC001055. RPRC003744. RPRC013785.  
RPRC014739. RPRC015332. RPRC014473. RPRC013318.  
RPRC000757. RPRC013466. RPRC001202. RPRC001286.  
RPRC012588. RPRC002281. RPRC010991. RPRC008535.  
RPRC014715. RPRC012174. RPRC004344. RPRC001740.  
RPRC000881. RPRC013601. RPRC014787. RPRC015232.  
RPRC014946. RPRC007402. RPRC001102. RPRC003727.  
RPRC004097. RPRC004817. RPRC006053. RPRC000467.  
RPRC015292. RPRC009939. RPRC000698. RPRC013987.  
RPRC009927. RPRC000864. RPRC011764. RPRC008081.  
RPRC001488. RPRC009342. RPRC008483. RPRC011604.  
RPRC005003. RPRC013497. RPRC013140. RPRC005826.  
RPRC014101. RPRC006207. RPRC000840. RPRC002885.  
RPRC012364. RPRC006491. RPRC000184-PB. RPRC000184.  
RPRC008406. RPRC000923. RPRC013461. RPRC004924.  
RPRC006160. RPRC000574. RPRC004605. RPRC012678.  
RPRC010212

GO:0016209 antioxidant activity F 7.58E+05 4.60E+04 3 24 over RPRC002923. RPRC015388. RPRC006756

RPRC009934. RPRC007595. RPRC007347. RPRC014110.  
RPRC012922. RPRC007468. RPRC007213. RPRC000982.  
RPRC011108. RPRC007344. RPRC009148. RPRC004883.  
RPRC005064. RPRC007907. RPRC011796. RPRC015195.  
RPRC011500. RPRC000422-PB. RPRC015401. RPRC007484.  
RPRC015008. RPRC004965. RPRC004717. RPRC011126

GO:0004672 protein kinase activity F 7.88E+05 4.79E+04 2 232 under RPRC000798. RPRC013371

RPRC000167. RPRC007014. RPRC001021. RPRC014610.  
RPRC014789. RPRC001666. RPRC015063. RPRC002513.  
RPRC007221. RPRC014924. RPRC013917. RPRC001790.  
RPRC003853. RPRC004234. RPRC006286. RPRC012318.  
RPRC005491. RPRC003777. RPRC012932. RPRC010391.  
RPRC011204. RPRC007535. RPRC004772. RPRC008485.



---

RPRC012856. RPRC009810. RPRC001637. RPRC002018.  
RPRC013487. RPRC008863. RPRC005633. RPRC000333.  
RPRC004767. RPRC000576. RPRC008787. RPRC013865.  
RPRC002851. RPRC000321. RPRC009634. RPRC006659.  
RPRC003907. RPRC008054. RPRC011471. RPRC008213.  
RPRC000404. RPRC007813. RPRC005852. RPRC000961.  
RPRC001330. RPRC013013. RPRC004886. RPRC002420.  
RPRC011932. RPRC011211. RPRC012556. RPRC003051.  
RPRC005528. RPRC011920. RPRC001792. RPRC008734.  
RPRC005019. RPRC012934. RPRC004319. RPRC008551.  
RPRC015112. RPRC007939. RPRC001692. RPRC004857.  
RPRC012994. RPRC004538. RPRC001149. RPRC007035.  
RPRC007915. RPRC013044. RPRC007732. RPRC000839.  
RPRC009931. RPRC004881. RPRC000803. RPRC003862.  
RPRC013175. RPRC014709. RPRC006868. RPRC011946.  
RPRC000625. RPRC015450. RPRC002358. RPRC006442.  
RPRC000863. RPRC014526. RPRC008334. RPRC013655.  
RPRC011910. RPRC010713. RPRC011822. RPRC011917.  
RPRC001610. RPRC010542. RPRC007432. RPRC010785.  
RPRC006668. RPRC008784. RPRC010466. RPRC006390.  
RPRC005057. RPRC012505. RPRC002282. RPRC008684.  
RPRC001741. RPRC012099. RPRC013105. RPRC014214.  
RPRC012489. RPRC002914. RPRC014191. RPRC014923.  
RPRC009431. RPRC013438. RPRC000699. RPRC007546.  
RPRC008560. RPRC014676. RPRC009184. RPRC008241.  
RPRC005266. RPRC008336. RPRC009893. RPRC001329.  
RPRC005349. RPRC006894. RPRC011919. RPRC014321.  
RPRC002957. RPRC011736. RPRC007812. RPRC012412.  
RPRC013036. RPRC006941. RPRC000736. RPRC004483.  
RPRC005095. RPRC012077. RPRC003304. RPRC012957.  
RPRC002438. RPRC002012. RPRC014583. RPRC002498.  
RPRC001555. RPRC007441. RPRC008402. RPRC001141.  
RPRC012200. RPRC007991. RPRC011277. RPRC006251.  
RPRC003276. RPRC011265. RPRC001869. RPRC009002.  
RPRC006429. RPRC001857. RPRC005941. RPRC001750.  
RPRC008628. RPRC013126. RPRC006860. RPRC015071.  
RPRC014223. RPRC007336. RPRC000814. RPRC010180.  
RPRC012179. RPRC007631. RPRC006548. RPRC004230.  
RPRC001255. RPRC013098. RPRC006377. RPRC000862.  
RPRC002038. RPRC014525. RPRC014832. RPRC013495.  
RPRC001940. RPRC010394. RPRC007591. RPRC005429.  
RPRC005800. RPRC008233. RPRC001693. RPRC010636.  
RPRC001226. RPRC003744. RPRC015332. RPRC010612.  
RPRC001202. RPRC010134. RPRC001286. RPRC004208.  
RPRC007119. RPRC012588. RPRC010991. RPRC014715.  
RPRC004344. RPRC001740. RPRC000881. RPRC013601.  
RPRC000248. RPRC014787. RPRC001102. RPRC003727.  
RPRC004097. RPRC011545. RPRC000467. RPRC009939.  
RPRC007079. RPRC000864. RPRC007788. RPRC001488.  
RPRC009342. RPRC013497. RPRC013140. RPRC011911.  
RPRC006207. RPRC015139. RPRC004705. RPRC003273.  
RPRC000184-PB. RPRC000184. RPRC008406. RPRC006669

---

## GO annotation terms for enriched transcripts in female library

| GO-ID      | Term                                   | Category* | FDR      | P-Value  | N° of genes in dataset D.E. | N° of genes in <i>R. prolixus</i> genome | Over/Under represented | VectorBase code of genes dataset D.E.                                                                                                                                                                                                                                                                                                                                                                                                                                                                                                                                                                                                                                                                                                                                  | VectorBase code of genes in <i>R. prolixus</i> genome                                                                                                                                                                                                                                                                                                                  |
|------------|----------------------------------------|-----------|----------|----------|-----------------------------|------------------------------------------|------------------------|------------------------------------------------------------------------------------------------------------------------------------------------------------------------------------------------------------------------------------------------------------------------------------------------------------------------------------------------------------------------------------------------------------------------------------------------------------------------------------------------------------------------------------------------------------------------------------------------------------------------------------------------------------------------------------------------------------------------------------------------------------------------|------------------------------------------------------------------------------------------------------------------------------------------------------------------------------------------------------------------------------------------------------------------------------------------------------------------------------------------------------------------------|
| GO:0003735 | structural constituent of ribosome     | F         | 1.09E-66 | 1.85E-70 | 62                          | 30                                       | over                   | RPRC012633, RPRC010853, RPRC003327, RPRC009716, RPRC012784, RPRC004269, RPRC013146, RPRC002520, RPRC007451, RPRC002698, RPRC010146, RPRC003768, RPRC014587, RPRC009189, RPRC013169, RPRC007328, RPRC013077, RPRC007856, RPRC012158, RPRC010378, RPRC012542, RPRC005701, RPRC010286, RPRC014419, RPRC003510, RPRC005980, RPRC014363, RPRC005724, RPRC012711, RPRC002544, RPRC006329, RPRC005430, RPRC002470, RPRC013786, RPRC009702, RPRC013851, RPRC011260, RPRC006974, RPRC011456, RPRC014620, RPRC013371, RPRC014845, RPRC011937, RPRC009337, RPRC012162, RPRC012353, RPRC012387, RPRC011596, RPRC005389, RPRC013504, RPRC013167, RPRC002923, RPRC015127, RPRC015001, RPRC010405, RPRC007825, RPRC010192, RPRC000499, RPRC012354, RPRC006392, RPRC007230, RPRC006309 | RPRC008799, RPRC014365, RPRC002822, RPRC009039, RPRC004296, RPRC011999, RPRC015409, RPRC012941, RPRC002505, RPRC012363, RPRC000922, RPRC006118, RPRC014793, RPRC006758, RPRC008479, RPRC010054, RPRC000972, RPRC003014, RPRC002869, RPRC005011, RPRC009871, RPRC012072, RPRC006051, RPRC010872, RPRC003980, RPRC009873, RPRC002897, RPRC004303, RPRC001328, RPRC010809 |
| GO:0022627 | cytosolic small ribosomal subunit      | C         | 1.22E+02 | 8.48E-01 | 4                           | 0                                        | over                   | RPRC010146, RPRC013504, RPRC002923, RPRC000499                                                                                                                                                                                                                                                                                                                                                                                                                                                                                                                                                                                                                                                                                                                         |                                                                                                                                                                                                                                                                                                                                                                        |
| GO:0005200 | structural constituent of cytoskeleton | F         | 4.20E+02 | 2.99E-01 | 6                           | 9                                        | over                   | RPRC003672, RPRC009875, RPRC005383, RPRC010283, RPRC007667, RPRC004762                                                                                                                                                                                                                                                                                                                                                                                                                                                                                                                                                                                                                                                                                                 | RPRC014380, RPRC014377, RPRC005328, RPRC011694, RPRC008372, RPRC008343, RPRC003842, RPRC015390, RPRC000816                                                                                                                                                                                                                                                             |
| GO:0070062 | extracellular exosome                  | C         | 2.86E+03 | 2.67E+01 | 5                           | 8                                        | over                   | RPRC008809, RPRC007515, RPRC001811, RPRC005383, RPRC012247                                                                                                                                                                                                                                                                                                                                                                                                                                                                                                                                                                                                                                                                                                             | RPRC015027, RPRC012892, RPRC007468, RPRC009243, RPRC011182, RPRC006358, RPRC000881, RPRC000267                                                                                                                                                                                                                                                                         |

|            |                                                                 |   |          |          |   |    |      |                                                                                                |                                                                                                                                                                                                                                                                                                                                                                                                                                                                                                                                                                                                                                    |
|------------|-----------------------------------------------------------------|---|----------|----------|---|----|------|------------------------------------------------------------------------------------------------|------------------------------------------------------------------------------------------------------------------------------------------------------------------------------------------------------------------------------------------------------------------------------------------------------------------------------------------------------------------------------------------------------------------------------------------------------------------------------------------------------------------------------------------------------------------------------------------------------------------------------------|
| GO:0051258 | protein polymerization                                          | P | 2.93E+03 | 2.78E+01 | 6 | 15 | over | RPRC003672, RPRC005383, RPRC010283, RPRC007667, RPRC011753, RPRC004762                         | RPRC014380, RPRC011530, RPRC014377, RPRC011608, RPRC011142, RPRC013158, RPRC005737, RPRC005939, RPRC011694, RPRC008372, RPRC004637, RPRC003842, RPRC003459, RPRC015390, RPRC000816                                                                                                                                                                                                                                                                                                                                                                                                                                                 |
| GO:0015986 | ATP synthesis coupled proton transport                          | P | 4.96E+03 | 5.39E+01 | 4 | 4  | over | RPRC011931, RPRC008498, RPRC010550, RPRC005917                                                 | RPRC003410, RPRC012073, RPRC008312, RPRC005494                                                                                                                                                                                                                                                                                                                                                                                                                                                                                                                                                                                     |
| GO:0019843 | rRNA binding                                                    | F | 4.96E+03 | 5.39E+01 | 4 | 4  | over | RPRC012633, RPRC012542, RPRC013371, RPRC011596                                                 | RPRC006783, RPRC014793, RPRC008479, RPRC011272                                                                                                                                                                                                                                                                                                                                                                                                                                                                                                                                                                                     |
| GO:0003924 | GTPase activity                                                 | F | 2.55E+04 | 3.81E+02 | 8 | 51 | over | RPRC012142, RPRC003672, RPRC005383, RPRC010283, RPRC007667, RPRC015041, RPRC012140, RPRC004762 | RPRC014380, RPRC013503, RPRC015134, RPRC004755, RPRC005628, RPRC011076, RPRC005457, RPRC014377, RPRC005906, RPRC013292, RPRC009003, RPRC011142, RPRC014184, RPRC008979, RPRC001144, RPRC001275, RPRC008122, RPRC001582, RPRC003793, RPRC011694, RPRC015352, RPRC009331, RPRC006970, RPRC007358, RPRC008372, RPRC001448, RPRC003416, RPRC011075, RPRC000800, RPRC012714, RPRC003842, RPRC014240, RPRC006334, RPRC002143, RPRC005936, RPRC005351, RPRC003442, RPRC005505, RPRC013790, RPRC000348, RPRC014951, RPRC004368, RPRC008854, RPRC013366, RPRC000816, RPRC015292, RPRC008666, RPRC002028, RPRC011274, RPRC012204, RPRC007250 |
| GO:0046933 | proton-transporting ATP synthase activity, rotational mechanism | F | 3.32E+04 | 5.27E+02 | 3 | 3  | over | RPRC011931, RPRC008498, RPRC005917                                                             | RPRC003410, RPRC012073, RPRC005494                                                                                                                                                                                                                                                                                                                                                                                                                                                                                                                                                                                                 |
| GO:0022625 | cytosolic large ribosomal subunit                               | C | 5.23E+04 | 9.32E+02 | 2 | 0  | over | RPRC014620, RPRC015127                                                                         |                                                                                                                                                                                                                                                                                                                                                                                                                                                                                                                                                                                                                                    |
| GO:0005874 | microtubule                                                     | C | 9.45E+04 | 2.02E+03 | 6 | 38 | over | RPRC003672, RPRC007515, RPRC005383, RPRC010283, RPRC007667, RPRC004762                         | RPRC014380, RPRC004943, RPRC011176, RPRC014377, RPRC010393, RPRC013227, RPRC002789, RPRC004988, RPRC011142, RPRC010423, RPRC014833, RPRC002641, RPRC010968, RPRC005737, RPRC001777, RPRC006473, RPRC011694, RPRC003935, RPRC004459, RPRC008372, RPRC012400, RPRC005456, RPRC002928, RPRC011282, RPRC003842, RPRC011177, RPRC015106, RPRC009316, RPRC005789, RPRC001728, RPRC005417, RPRC015439, RPRC010046, RPRC000816, RPRC004870, RPRC012381, RPRC013987, RPRC001778                                                                                                                                                             |

|            |                                        |   |          |          |   |     |       |                                                |                                                                                                                                                                                                                                                                                                                                                                                                                                                                                                                                                                                                                                                                                                                                                                                                                                                                                                                                                                                                                                                                                                                                                                                                                                                                                                                                                                                                                                                                                                                                                                                                                                                                                                                                                                                                                                                                                                                                                                                                                                                                                                                                                                                                                                                                                                                                                                                                                                                 |
|------------|----------------------------------------|---|----------|----------|---|-----|-------|------------------------------------------------|-------------------------------------------------------------------------------------------------------------------------------------------------------------------------------------------------------------------------------------------------------------------------------------------------------------------------------------------------------------------------------------------------------------------------------------------------------------------------------------------------------------------------------------------------------------------------------------------------------------------------------------------------------------------------------------------------------------------------------------------------------------------------------------------------------------------------------------------------------------------------------------------------------------------------------------------------------------------------------------------------------------------------------------------------------------------------------------------------------------------------------------------------------------------------------------------------------------------------------------------------------------------------------------------------------------------------------------------------------------------------------------------------------------------------------------------------------------------------------------------------------------------------------------------------------------------------------------------------------------------------------------------------------------------------------------------------------------------------------------------------------------------------------------------------------------------------------------------------------------------------------------------------------------------------------------------------------------------------------------------------------------------------------------------------------------------------------------------------------------------------------------------------------------------------------------------------------------------------------------------------------------------------------------------------------------------------------------------------------------------------------------------------------------------------------------------------|
| GO:0003746 | translation elongation factor activity | F | 1.04E+05 | 2.29E+03 | 4 | 15  | over  | RPRC012142, RPRC007684, RPRC015041, RPRC012140 | RPRC012040, RPRC012111, RPRC013273, RPRC011076, RPRC009039, RPRC003914, RPRC007456, RPRC001582, RPRC005473, RPRC011027, RPRC002143, RPRC005936, RPRC002752, RPRC005351, RPRC011916                                                                                                                                                                                                                                                                                                                                                                                                                                                                                                                                                                                                                                                                                                                                                                                                                                                                                                                                                                                                                                                                                                                                                                                                                                                                                                                                                                                                                                                                                                                                                                                                                                                                                                                                                                                                                                                                                                                                                                                                                                                                                                                                                                                                                                                              |
| GO:0006468 | protein phosphorylation                | P | 1.19E+05 | 2.88E+03 | 0 | 204 | under |                                                | RPRC000167, RPRC007014, RPRC001021, RPRC014610, RPRC014789, RPRC001666, RPRC015063, RPRC002513, RPRC014924, RPRC001790, RPRC004860, RPRC003853, RPRC006286, RPRC012318, RPRC005491, RPRC003777, RPRC012932, RPRC010391, RPRC007535, RPRC004772, RPRC008485, RPRC012856, RPRC001637, RPRC002018, RPRC013487, RPRC005633, RPRC000333, RPRC004767, RPRC013865, RPRC002851, RPRC000321, RPRC009634, RPRC006659, RPRC008054, RPRC011471, RPRC008213, RPRC007813, RPRC005852, RPRC000961, RPRC001330, RPRC013013, RPRC004886, RPRC011932, RPRC012556, RPRC003051, RPRC011920, RPRC001792, RPRC008734, RPRC005019, RPRC012934, RPRC004319, RPRC015112, RPRC007939, RPRC001692, RPRC008168, RPRC004857, RPRC015100, RPRC012994, RPRC001149, RPRC007035, RPRC007915, RPRC007732, RPRC000839, RPRC009931, RPRC004881, RPRC003862, RPRC013175, RPRC011946, RPRC015450, RPRC006442, RPRC000863, RPRC014526, RPRC008334, RPRC013655, RPRC011910, RPRC013400, RPRC010713, RPRC011822, RPRC011917, RPRC001610, RPRC007432, RPRC010785, RPRC006668, RPRC008636, RPRC008784, RPRC006390, RPRC015014, RPRC002282, RPRC001741, RPRC012099, RPRC013105, RPRC012489, RPRC002914, RPRC014191, RPRC014923, RPRC009431, RPRC000699, RPRC007546, RPRC014676, RPRC009184, RPRC008241, RPRC005266, RPRC008336, RPRC005349, RPRC006894, RPRC011919, RPRC014321, RPRC002957, RPRC004754, RPRC007812, RPRC012412, RPRC011796, RPRC013036, RPRC006941, RPRC000736, RPRC004483, RPRC005095, RPRC012077, RPRC012957, RPRC002438, RPRC001555, RPRC007441, RPRC001141, RPRC012200, RPRC007991, RPRC009026, RPRC006251, RPRC003276, RPRC011265, RPRC009002, RPRC006429, RPRC006577, RPRC001750, RPRC013126, RPRC006860, RPRC002309, RPRC013778, RPRC014223, RPRC007336, RPRC000814, RPRC010180, RPRC012179, RPRC007631, RPRC006548, RPRC004230, RPRC006377, RPRC000862, RPRC000798, RPRC002038, RPRC013495, RPRC003442, RPRC001940, RPRC010394, RPRC007591, RPRC005800, RPRC008233, RPRC001693, RPRC011502, RPRC010636, RPRC001226, RPRC007981, RPRC003744, RPRC015332, RPRC002559, RPRC010134, RPRC001286, RPRC004208, RPRC008854, RPRC007119, RPRC005317, RPRC001031, RPRC012588, RPRC010991, RPRC014715, RPRC015085, RPRC004344, RPRC001740, RPRC000881, RPRC013601, RPRC014787, RPRC001102, RPRC003727, RPRC004097, RPRC015156, RPRC006467, RPRC011545, RPRC009939, RPRC000864, RPRC007788, RPRC006124, RPRC009342, RPRC013497, RPRC004717, RPRC013140, RPRC011911, RPRC006207, |

|            |                                                          |   |          |          |    |     |      |                                                                                                                        |                                                                                                                                                                                                                                                                                                                                                                                                                                                                                                                                                                                                                                                                                                                                                                                                 |
|------------|----------------------------------------------------------|---|----------|----------|----|-----|------|------------------------------------------------------------------------------------------------------------------------|-------------------------------------------------------------------------------------------------------------------------------------------------------------------------------------------------------------------------------------------------------------------------------------------------------------------------------------------------------------------------------------------------------------------------------------------------------------------------------------------------------------------------------------------------------------------------------------------------------------------------------------------------------------------------------------------------------------------------------------------------------------------------------------------------|
|            |                                                          |   |          |          |    |     |      |                                                                                                                        | RPRC004705, RPRC001221, RPRC003273, RPRC000184-PB, RPRC000184, RPRC011516, RPRC008406, RPRC006669                                                                                                                                                                                                                                                                                                                                                                                                                                                                                                                                                                                                                                                                                               |
| GO:0045277 | respiratory chain complex IV                             | C | 1.19E+05 | 2.89E+03 | 3  | 7   | over | RPRC012256, RPRC005409, RPRC011839                                                                                     | RPRC007811, RPRC000780, RPRC010093, RPRC005506, RPRC003685, RPRC005092, RPRC010094                                                                                                                                                                                                                                                                                                                                                                                                                                                                                                                                                                                                                                                                                                              |
| GO:0004129 | cytochrome-c oxidase activity                            | F | 1.19E+05 | 2.89E+03 | 3  | 7   | over | RPRC012256, RPRC005409, RPRC011839                                                                                     | RPRC007811, RPRC000780, RPRC010093, RPRC005506, RPRC003685, RPRC005092, RPRC010094                                                                                                                                                                                                                                                                                                                                                                                                                                                                                                                                                                                                                                                                                                              |
| GO:0006123 | mitochondrial electron transport, cytochrome c to oxygen | P | 1.19E+05 | 2.89E+03 | 3  | 7   | over | RPRC012256, RPRC005409, RPRC011839                                                                                     | RPRC007811, RPRC000780, RPRC010093, RPRC005506, RPRC003685, RPRC005092, RPRC010094                                                                                                                                                                                                                                                                                                                                                                                                                                                                                                                                                                                                                                                                                                              |
| GO:0005549 | odorant binding                                          | F | 1.19E+05 | 2.89E+03 | 3  | 7   | over | RPRC000174, RPRC010284, RPRC004407                                                                                     | RPRC000274, RPRC009905, RPRC000476, RPRC010357, RPRC000378, RPRC014985, RPRC004408                                                                                                                                                                                                                                                                                                                                                                                                                                                                                                                                                                                                                                                                                                              |
| GO:0006448 | regulation of translational elongation                   | P | 1.97E+04 | 5.58E+03 | 4  | 20  | over | RPRC012142, RPRC007684, RPRC015041, RPRC012140                                                                         | RPRC012040, RPRC014027, RPRC012111, RPRC013273, RPRC011076, RPRC009039, RPRC003914, RPRC015450, RPRC007456, RPRC001582, RPRC005473, RPRC011027, RPRC002143, RPRC005280, RPRC005936, RPRC002752, RPRC005351, RPRC011916, RPRC012971, RPRC008081                                                                                                                                                                                                                                                                                                                                                                                                                                                                                                                                                  |
| GO:0005525 | GTP binding                                              | F | 2.14E+05 | 6.20E+03 | 10 | 120 | over | RPRC012142, RPRC015257, RPRC003672, RPRC001811, RPRC005383, RPRC010283, RPRC007667, RPRC015041, RPRC012140, RPRC004762 | RPRC014380, RPRC011062, RPRC015453, RPRC013503, RPRC015134, RPRC005498, RPRC008142, RPRC004755, RPRC005852, RPRC013261, RPRC007642, RPRC005628, RPRC011076, RPRC005457, RPRC003955, RPRC010209, RPRC014377, RPRC010918, RPRC003772, RPRC006830, RPRC013168, RPRC005906, RPRC013292, RPRC009003, RPRC008853, RPRC012492, RPRC015391, RPRC013377, RPRC007644, RPRC010913, RPRC010340, RPRC011142, RPRC003248, RPRC003065, RPRC004007, RPRC007066, RPRC005518, RPRC014184, RPRC008979, RPRC001144, RPRC008553, RPRC010076, RPRC001275, RPRC014716, RPRC008122, RPRC001582, RPRC003793, RPRC011694, RPRC005832, RPRC011936, RPRC015352, RPRC009331, RPRC006970, RPRC014014, RPRC009243, RPRC007358, RPRC008372, RPRC001448, RPRC011075, RPRC000800, RPRC012714, RPRC010563, RPRC003842, RPRC015449, |

|            |                                                               |   |          |          |   |     |       |                                                |                                                                                                                                                                                                                                                                                                                                                                                                                                                                                                                                                                                                                                                                                                                                                                                                                                                                                                                                                                                                                                                                                                                                                                                                                                                                                                                                                                                                 |                                                                                                                                                                                                                                                                                                                                                                                                                                                                                                                                                                                                                                                                                                |
|------------|---------------------------------------------------------------|---|----------|----------|---|-----|-------|------------------------------------------------|-------------------------------------------------------------------------------------------------------------------------------------------------------------------------------------------------------------------------------------------------------------------------------------------------------------------------------------------------------------------------------------------------------------------------------------------------------------------------------------------------------------------------------------------------------------------------------------------------------------------------------------------------------------------------------------------------------------------------------------------------------------------------------------------------------------------------------------------------------------------------------------------------------------------------------------------------------------------------------------------------------------------------------------------------------------------------------------------------------------------------------------------------------------------------------------------------------------------------------------------------------------------------------------------------------------------------------------------------------------------------------------------------|------------------------------------------------------------------------------------------------------------------------------------------------------------------------------------------------------------------------------------------------------------------------------------------------------------------------------------------------------------------------------------------------------------------------------------------------------------------------------------------------------------------------------------------------------------------------------------------------------------------------------------------------------------------------------------------------|
|            |                                                               |   |          |          |   |     |       |                                                |                                                                                                                                                                                                                                                                                                                                                                                                                                                                                                                                                                                                                                                                                                                                                                                                                                                                                                                                                                                                                                                                                                                                                                                                                                                                                                                                                                                                 | RPRC009576, RPRC014240, RPRC008314, RPRC007034, RPRC005889, RPRC006334, RPRC002143, RPRC007838, RPRC013286, RPRC007643, RPRC007802, RPRC004106, RPRC014052, RPRC004254, RPRC005936, RPRC005351, RPRC012940, RPRC006938, RPRC009742, RPRC011124, RPRC003442, RPRC002735, RPRC005505, RPRC013790, RPRC015125, RPRC005482, RPRC005553, RPRC000348, RPRC014951, RPRC004368, RPRC006886, RPRC008854, RPRC003337, RPRC009223, RPRC015392, RPRC013366, RPRC000816, RPRC011864, RPRC013915, RPRC015292, RPRC004710, RPRC004646, RPRC008666, RPRC014910, RPRC008081, RPRC014929, RPRC002028, RPRC013508, RPRC011274, RPRC006184, RPRC004629, RPRC012204, RPRC000267, RPRC003970, RPRC003344, RPRC007250 |
| GO:0098800 | inner mitochondrial membrane protein complex                  | C | 2.18E+04 | 6.49E+03 | 4 | 21  | over  | RPRC012256, RPRC008827, RPRC010550, RPRC006976 | RPRC005212, RPRC013687, RPRC008337, RPRC011666, RPRC013972, RPRC013180, RPRC012073, RPRC010093, RPRC007427, RPRC004174, RPRC006787, RPRC000615, RPRC008312, RPRC004785, RPRC005989, RPRC007507, RPRC003690, RPRC005736, RPRC004687, RPRC013690, RPRC010094                                                                                                                                                                                                                                                                                                                                                                                                                                                                                                                                                                                                                                                                                                                                                                                                                                                                                                                                                                                                                                                                                                                                      |                                                                                                                                                                                                                                                                                                                                                                                                                                                                                                                                                                                                                                                                                                |
| GO:0045261 | proton-transporting ATP synthase complex, catalytic core F(1) | C | 2.73E+05 | 8.77E+02 | 2 | 3   | over  | RPRC011931, RPRC008498                         | RPRC003410, RPRC012073, RPRC005494                                                                                                                                                                                                                                                                                                                                                                                                                                                                                                                                                                                                                                                                                                                                                                                                                                                                                                                                                                                                                                                                                                                                                                                                                                                                                                                                                              |                                                                                                                                                                                                                                                                                                                                                                                                                                                                                                                                                                                                                                                                                                |
| GO:0004672 | protein kinase activity                                       | F | 3.06E+05 | 1.01E+04 | 1 | 233 | under | RPRC013371                                     | RPRC000167, RPRC007014, RPRC001021, RPRC014610, RPRC014789, RPRC001666, RPRC015063, RPRC002513, RPRC007221, RPRC014924, RPRC013917, RPRC001790, RPRC003853, RPRC004234, RPRC006286, RPRC012318, RPRC005491, RPRC003777, RPRC012932, RPRC010391, RPRC011204, RPRC007535, RPRC004772, RPRC008485, RPRC012856, RPRC009810, RPRC001637, RPRC002018, RPRC013487, RPRC008863, RPRC005633, RPRC000333, RPRC004767, RPRC000576, RPRC008787, RPRC013865, RPRC002851, RPRC000321, RPRC009634, RPRC006659, RPRC003907, RPRC008054, RPRC011471, RPRC008213, RPRC000404, RPRC007813, RPRC005852, RPRC000961, RPRC001330, RPRC013013, RPRC004886, RPRC002420, RPRC011932, RPRC011211, RPRC012556, RPRC003051, RPRC005528, RPRC011920, RPRC001792, RPRC008734, RPRC005019, RPRC012934, RPRC004319, RPRC008551, RPRC015112, RPRC007939, RPRC001692, RPRC004857, RPRC012994, RPRC004538, RPRC001149, RPRC007035, RPRC007915, RPRC013044, RPRC007732, RPRC000839, RPRC009931, RPRC004881, RPRC000803, RPRC003862, RPRC013175, RPRC014709, RPRC006868, RPRC011946, RPRC000625, RPRC015450, RPRC002358, RPRC006442, RPRC000863, RPRC014526, RPRC008334, RPRC013655, RPRC011910, RPRC010713, RPRC011822, RPRC011917, RPRC001610, RPRC010542, RPRC007432, RPRC010785, RPRC006668, RPRC008784, RPRC010466, RPRC006390, RPRC005057, RPRC012505, RPRC002282, RPRC008684, RPRC001741, RPRC012099, RPRC013105, RPRC014214, |                                                                                                                                                                                                                                                                                                                                                                                                                                                                                                                                                                                                                                                                                                |

---

RPRC012489, RPRC002914, RPRC014191, RPRC014923,  
RPRC009431, RPRC013438, RPRC000699, RPRC007546,  
RPRC008560, RPRC014676, RPRC009184, RPRC008241,  
RPRC005266, RPRC008336, RPRC009893, RPRC001329,  
RPRC005349, RPRC006894, RPRC011919, RPRC014321,  
RPRC002957, RPRC011736, RPRC007812, RPRC012412,  
RPRC013036, RPRC006941, RPRC000736, RPRC004483,  
RPRC005095, RPRC012077, RPRC003304, RPRC012957,  
RPRC002438, RPRC002012, RPRC014583, RPRC002498,  
RPRC001555, RPRC007441, RPRC008402, RPRC001141,  
RPRC012200, RPRC007991, RPRC011277, RPRC006251,  
RPRC003276, RPRC011265, RPRC001869, RPRC009002,  
RPRC006429, RPRC001857, RPRC005941, RPRC001750,  
RPRC008628, RPRC013126, RPRC006860, RPRC015071,  
RPRC014223, RPRC007336, RPRC000814, RPRC010180,  
RPRC012179, RPRC007631, RPRC006548, RPRC004230,  
RPRC001255, RPRC013098, RPRC006377, RPRC000862,  
RPRC000798, RPRC002038, RPRC014525, RPRC014832,  
RPRC013495, RPRC001940, RPRC010394, RPRC007591,  
RPRC005429, RPRC005800, RPRC008233, RPRC001693,  
RPRC010636, RPRC001226, RPRC003744, RPRC015332,  
RPRC010612, RPRC001202, RPRC010134, RPRC001286,  
RPRC004208, RPRC007119, RPRC012588, RPRC010991,  
RPRC014715, RPRC004344, RPRC001740, RPRC000881,  
RPRC013601, RPRC000248, RPRC014787, RPRC001102,  
RPRC003727, RPRC004097, RPRC011545, RPRC000467,  
RPRC009939, RPRC007079, RPRC000864, RPRC007788,  
RPRC001488, RPRC009342, RPRC013497, RPRC013140,  
RPRC011911, RPRC006207, RPRC015139, RPRC004705,  
RPRC003273, RPRC000184-PB, RPRC000184, RPRC008406,  
RPRC006669

---

GO:0008233    peptidase activity    F    4.16E+05    1.47E+04    1    219    under    RPRC006290

RPRC009154, RPRC003097, RPRC003320, RPRC015015,  
RPRC009301, RPRC014463, RPRC014770, RPRC006557,  
RPRC010196, RPRC003168, RPRC001252, RPRC007074,  
RPRC011388, RPRC008278, RPRC013356, RPRC001240,  
RPRC012649, RPRC007157, RPRC012785, RPRC013734,  
RPRC012868, RPRC008963, RPRC012613, RPRC012920,  
RPRC003351, RPRC005414, RPRC015289, RPRC001944,  
RPRC010398, RPRC009977, RPRC002249, RPRC012513,  
RPRC001697, RPRC000913, RPRC013717, RPRC011176,  
RPRC000890, RPRC010309, RPRC000973, RPRC012508,  
RPRC009789, RPRC014294, RPRC008515, RPRC008037,  
RPRC013001, RPRC008587, RPRC013665, RPRC005262,  
RPRC006216, RPRC009127, RPRC010640, RPRC008989,  
RPRC004798, RPRC015124, RPRC010795, RPRC005321,  
RPRC009800, RPRC005067, RPRC006028, RPRC014950,  
RPRC012970, RPRC014407, RPRC002948, RPRC011018,  
RPRC006554, RPRC009294, RPRC008510, RPRC003153,  
RPRC008753, RPRC012487, RPRC007632, RPRC011066,  
RPRC013584, RPRC007692, RPRC013731, RPRC002919,  
RPRC003360, RPRC014196, RPRC014184, RPRC008099,  
RPRC002884, RPRC002310, RPRC014012, RPRC008063,  
RPRC011427, RPRC014338, RPRC010708, RPRC006644,  
RPRC000644, RPRC002696, RPRC000905, RPRC002377,  
RPRC015393, RPRC008831, RPRC008448, RPRC003155,  
RPRC008034, RPRC003864, RPRC012075, RPRC007220,

---



|            |                  |   |          |          |   |    |      |                                                |                                                                                                                                                                                                                                                                                                                                                                                                |                                                                                                                                                                                                                                                                                                                                                                                                                                                                                                                                                                                                                                                                                                                                                                                                                                                                                                                                                                                                                                                                                                                                                                                                                                                                                                                                                                                                                                                                                    |
|------------|------------------|---|----------|----------|---|----|------|------------------------------------------------|------------------------------------------------------------------------------------------------------------------------------------------------------------------------------------------------------------------------------------------------------------------------------------------------------------------------------------------------------------------------------------------------|------------------------------------------------------------------------------------------------------------------------------------------------------------------------------------------------------------------------------------------------------------------------------------------------------------------------------------------------------------------------------------------------------------------------------------------------------------------------------------------------------------------------------------------------------------------------------------------------------------------------------------------------------------------------------------------------------------------------------------------------------------------------------------------------------------------------------------------------------------------------------------------------------------------------------------------------------------------------------------------------------------------------------------------------------------------------------------------------------------------------------------------------------------------------------------------------------------------------------------------------------------------------------------------------------------------------------------------------------------------------------------------------------------------------------------------------------------------------------------|
|            |                  |   |          |          |   |    |      |                                                |                                                                                                                                                                                                                                                                                                                                                                                                | RPRC000308, RPRC008253, RPRC002519, RPRC012465, RPRC000717, RPRC008082, RPRC014262, RPRC001796, RPRC007936, RPRC006929, RPRC001700, RPRC015288, RPRC002472, RPRC006917, RPRC003357, RPRC002798, RPRC003102, RPRC011748, RPRC010532, RPRC015188, RPRC011322, RPRC015323, RPRC007429, RPRC009226, RPRC001679, RPRC006558, RPRC010834, RPRC013528, RPRC008598, RPRC014045, RPRC009433, RPRC012786, RPRC008733, RPRC011672, RPRC006605, RPRC006753, RPRC010965, RPRC012212, RPRC005829, RPRC011129, RPRC006092, RPRC001372, RPRC002326, RPRC014897, RPRC006907, RPRC010280, RPRC005463, RPRC013126, RPRC004585, RPRC000405, RPRC013990, RPRC003247, RPRC002593, RPRC000886, RPRC003478, RPRC015385, RPRC000294, RPRC007479, RPRC011762, RPRC009595, RPRC004620, RPRC011379, RPRC013495, RPRC003708, RPRC009021, RPRC012374, RPRC000205, RPRC013009, RPRC012350, RPRC005322, RPRC007219, RPRC003608, RPRC001374, RPRC005405, RPRC009004, RPRC006898, RPRC014325, RPRC003668, RPRC004113, RPRC008281, RPRC009383, RPRC015415, RPRC007881, RPRC003230, RPRC010205, RPRC006957, RPRC000816, RPRC014468, RPRC003154, RPRC001652, RPRC003556, RPRC001747, RPRC003715, RPRC013661, RPRC007007, RPRC014699, RPRC013490, RPRC005596, RPRC005607, RPRC011776, RPRC003946, RPRC013732, RPRC015299, RPRC013349, RPRC011752, RPRC000219, RPRC014822, RPRC011433, RPRC004789, RPRC014810, RPRC009668, RPRC014173, RPRC010407, RPRC009349, RPRC009720, RPRC006893, RPRC014013, RPRC003090, RPRC000107 |
| GO:0005811 | lipid particle   | C | 4.58E+04 | 1.64E+04 | 3 | 15 | over | RPRC009875, RPRC010550, RPRC012662             | RPRC005070, RPRC003924, RPRC013670, RPRC014760, RPRC003294, RPRC011461, RPRC009022, RPRC008122, RPRC003793, RPRC005989, RPRC007507, RPRC012740, RPRC009418, RPRC015232, RPRC013987                                                                                                                                                                                                             |                                                                                                                                                                                                                                                                                                                                                                                                                                                                                                                                                                                                                                                                                                                                                                                                                                                                                                                                                                                                                                                                                                                                                                                                                                                                                                                                                                                                                                                                                    |
| GO:0000910 | cytokinesis      | P | 4.89E+05 | 2.31E+04 | 2 | 6  | over | RPRC007515, RPRC009875                         | RPRC006338, RPRC010698, RPRC003092, RPRC000800, RPRC007538, RPRC009554                                                                                                                                                                                                                                                                                                                         |                                                                                                                                                                                                                                                                                                                                                                                                                                                                                                                                                                                                                                                                                                                                                                                                                                                                                                                                                                                                                                                                                                                                                                                                                                                                                                                                                                                                                                                                                    |
| GO:0005506 | iron ion binding | F | 4.89E+05 | 2.33E+04 | 4 | 32 | over | RPRC010050, RPRC005729, RPRC013804, RPRC003270 | RPRC003227, RPRC007511, RPRC014860, RPRC012297, RPRC009967, RPRC004769, RPRC009370, RPRC003886, RPRC012677, RPRC005454, RPRC000592, RPRC009881, RPRC005615, RPRC003942, RPRC004701, RPRC007672, RPRC007034, RPRC012024, RPRC013830, RPRC001745, RPRC013447, RPRC001881, RPRC007077, RPRC007300, RPRC005553, RPRC006400, RPRC014149, RPRC010679, RPRC004244, RPRC000626, RPRC014101, RPRC015287 |                                                                                                                                                                                                                                                                                                                                                                                                                                                                                                                                                                                                                                                                                                                                                                                                                                                                                                                                                                                                                                                                                                                                                                                                                                                                                                                                                                                                                                                                                    |

---

|            |                   |   |          |          |   |   |      |            |
|------------|-------------------|---|----------|----------|---|---|------|------------|
| GO:0005125 | cytokine activity | F | 4.89E+05 | 3.06E+04 | 1 | 0 | over | RPRC002698 |
|------------|-------------------|---|----------|----------|---|---|------|------------|

---

|            |                           |   |          |          |   |   |      |            |
|------------|---------------------------|---|----------|----------|---|---|------|------------|
| GO:0035690 | cellular response to drug | P | 4.89E+05 | 3.06E+04 | 1 | 0 | over | RPRC007515 |
|------------|---------------------------|---|----------|----------|---|---|------|------------|

---

|            |                       |   |          |          |   |   |      |            |
|------------|-----------------------|---|----------|----------|---|---|------|------------|
| GO:0043274 | phospholipase binding | F | 4.89E+05 | 3.06E+04 | 1 | 0 | over | RPRC007515 |
|------------|-----------------------|---|----------|----------|---|---|------|------------|

---

|            |                                      |   |          |          |   |   |      |            |
|------------|--------------------------------------|---|----------|----------|---|---|------|------------|
| GO:0001837 | epithelial to mesenchymal transition | P | 4.89E+05 | 3.06E+04 | 1 | 0 | over | RPRC007515 |
|------------|--------------------------------------|---|----------|----------|---|---|------|------------|

---

|            |                                          |   |          |          |   |   |      |            |
|------------|------------------------------------------|---|----------|----------|---|---|------|------------|
| GO:0055117 | regulation of cardiac muscle contraction | P | 4.89E+05 | 3.06E+04 | 1 | 0 | over | RPRC007515 |
|------------|------------------------------------------|---|----------|----------|---|---|------|------------|

---

|            |                                  |   |          |          |   |   |      |            |
|------------|----------------------------------|---|----------|----------|---|---|------|------------|
| GO:0000028 | ribosomal small subunit assembly | P | 4.89E+05 | 3.06E+04 | 1 | 0 | over | RPRC000499 |
|------------|----------------------------------|---|----------|----------|---|---|------|------------|

---

|            |                                                          |   |          |          |   |   |      |            |
|------------|----------------------------------------------------------|---|----------|----------|---|---|------|------------|
| GO:0060079 | regulation of excitatory postsynaptic membrane potential | P | 4.89E+05 | 3.06E+04 | 1 | 0 | over | RPRC007515 |
|------------|----------------------------------------------------------|---|----------|----------|---|---|------|------------|

---

|            |                                      |   |          |          |   |   |      |            |
|------------|--------------------------------------|---|----------|----------|---|---|------|------------|
| GO:0003958 | NADPH-hemoprotein reductase activity | F | 4.89E+05 | 3.06E+04 | 1 | 0 | over | RPRC005729 |
|------------|--------------------------------------|---|----------|----------|---|---|------|------------|

---

---

|            |                |   |          |          |   |   |      |            |
|------------|----------------|---|----------|----------|---|---|------|------------|
| GO:0015886 | heme transport | P | 4.89E+05 | 3.06E+04 | 1 | 0 | over | RPRC009283 |
|------------|----------------|---|----------|----------|---|---|------|------------|

---

|            |                                 |   |          |          |   |   |      |            |
|------------|---------------------------------|---|----------|----------|---|---|------|------------|
| GO:0043024 | ribosomal small subunit binding | F | 4.89E+05 | 3.06E+04 | 1 | 0 | over | RPRC001811 |
|------------|---------------------------------|---|----------|----------|---|---|------|------------|

---

|            |                       |   |          |          |   |   |      |            |
|------------|-----------------------|---|----------|----------|---|---|------|------------|
| GO:0010992 | ubiquitin homeostasis | P | 4.89E+05 | 3.06E+04 | 1 | 0 | over | RPRC012247 |
|------------|-----------------------|---|----------|----------|---|---|------|------------|

---

|            |                                                   |   |          |          |   |   |      |            |
|------------|---------------------------------------------------|---|----------|----------|---|---|------|------------|
| GO:0033192 | calmodulin-dependent protein phosphatase activity | F | 4.89E+05 | 3.06E+04 | 1 | 0 | over | RPRC007515 |
|------------|---------------------------------------------------|---|----------|----------|---|---|------|------------|

---

|            |                          |   |          |          |   |   |      |            |
|------------|--------------------------|---|----------|----------|---|---|------|------------|
| GO:0006407 | rRNA export from nucleus | P | 4.89E+05 | 3.06E+04 | 1 | 0 | over | RPRC010146 |
|------------|--------------------------|---|----------|----------|---|---|------|------------|

---

|            |                                    |   |          |          |   |   |      |            |
|------------|------------------------------------|---|----------|----------|---|---|------|------------|
| GO:0033173 | calcineurin-NFAT signaling cascade | P | 4.89E+05 | 3.06E+04 | 1 | 0 | over | RPRC007515 |
|------------|------------------------------------|---|----------|----------|---|---|------|------------|

---

|            |                                                  |   |          |          |   |   |      |            |
|------------|--------------------------------------------------|---|----------|----------|---|---|------|------------|
| GO:0035307 | positive regulation of protein dephosphorylation | P | 4.89E+05 | 3.06E+04 | 1 | 0 | over | RPRC007515 |
|------------|--------------------------------------------------|---|----------|----------|---|---|------|------------|

---

|            |                             |   |          |          |   |   |      |            |
|------------|-----------------------------|---|----------|----------|---|---|------|------------|
| GO:0001569 | patterning of blood vessels | P | 4.89E+05 | 3.06E+04 | 1 | 0 | over | RPRC007515 |
|------------|-----------------------------|---|----------|----------|---|---|------|------------|

---

---

|            |                                                                                         |   |          |          |   |   |      |            |
|------------|-----------------------------------------------------------------------------------------|---|----------|----------|---|---|------|------------|
| GO:0010880 | regulation of release of sequestered calcium ion into cytosol by sarcoplasmic reticulum | P | 4.89E+05 | 3.06E+04 | 1 | 0 | over | RPRC007515 |
| GO:0071333 | cellular response to glucose stimulus                                                   | P | 4.89E+05 | 3.06E+04 | 1 | 0 | over | RPRC007515 |
| GO:0006336 | DNA replication-independent nucleosome assembly                                         | P | 4.89E+05 | 3.06E+04 | 1 | 0 | over | RPRC008809 |
| GO:0042383 | sarcolemma                                                                              | C | 4.89E+05 | 3.06E+04 | 1 | 0 | over | RPRC007515 |
| GO:0032587 | ruffle membrane                                                                         | C | 4.89E+05 | 3.06E+04 | 1 | 0 | over | RPRC001811 |
| GO:0032516 | positive regulation of phosphoprotein phosphatase activity                              | P | 4.89E+05 | 3.06E+04 | 1 | 0 | over | RPRC007515 |
| GO:0046676 | negative regulation of insulin secretion                                                | P | 4.89E+05 | 3.06E+04 | 1 | 0 | over | RPRC007515 |
| GO:0031997 | N-terminal myristoylation domain binding                                                | F | 4.89E+05 | 3.06E+04 | 1 | 0 | over | RPRC007515 |

---

---

|            |                      |   |          |          |   |   |      |            |
|------------|----------------------|---|----------|----------|---|---|------|------------|
| GO:0031996 | thioesterase binding | F | 4.89E+05 | 3.06E+04 | 1 | 0 | over | RPRC007515 |
|------------|----------------------|---|----------|----------|---|---|------|------------|

---

|            |               |   |          |          |   |   |      |            |
|------------|---------------|---|----------|----------|---|---|------|------------|
| GO:0031932 | TORC2 complex | C | 4.89E+05 | 3.06E+04 | 1 | 0 | over | RPRC012706 |
|------------|---------------|---|----------|----------|---|---|------|------------|

---

|            |               |   |          |          |   |   |      |            |
|------------|---------------|---|----------|----------|---|---|------|------------|
| GO:0031929 | TOR signaling | P | 4.89E+05 | 3.06E+04 | 1 | 0 | over | RPRC012706 |
|------------|---------------|---|----------|----------|---|---|------|------------|

---

|            |                                      |   |          |          |   |   |      |            |
|------------|--------------------------------------|---|----------|----------|---|---|------|------------|
| GO:0015439 | heme-transporting<br>ATPase activity | F | 4.89E+05 | 3.06E+04 | 1 | 0 | over | RPRC009283 |
|------------|--------------------------------------|---|----------|----------|---|---|------|------------|

---

|            |                                      |   |          |          |   |   |      |            |
|------------|--------------------------------------|---|----------|----------|---|---|------|------------|
| GO:0048741 | skeletal muscle fiber<br>development | P | 4.89E+05 | 3.06E+04 | 1 | 0 | over | RPRC007515 |
|------------|--------------------------------------|---|----------|----------|---|---|------|------------|

---

|            |                    |   |          |          |   |   |      |            |
|------------|--------------------|---|----------|----------|---|---|------|------------|
| GO:0000788 | nuclear nucleosome | C | 4.89E+05 | 3.06E+04 | 1 | 0 | over | RPRC008809 |
|------------|--------------------|---|----------|----------|---|---|------|------------|

---

|            |                             |   |          |          |   |   |      |            |
|------------|-----------------------------|---|----------|----------|---|---|------|------------|
| GO:0005513 | detection of calcium<br>ion | P | 4.89E+05 | 3.06E+04 | 1 | 0 | over | RPRC007515 |
|------------|-----------------------------|---|----------|----------|---|---|------|------------|

---

|            |                                           |   |          |          |   |   |      |            |
|------------|-------------------------------------------|---|----------|----------|---|---|------|------------|
| GO:0014883 | transition between<br>fast and slow fiber | P | 4.89E+05 | 3.06E+04 | 1 | 0 | over | RPRC007515 |
|------------|-------------------------------------------|---|----------|----------|---|---|------|------------|

---

---

|            |                                                         |   |          |          |   |   |      |            |
|------------|---------------------------------------------------------|---|----------|----------|---|---|------|------------|
| GO:0045955 | negative regulation of calcium ion-dependent exocytosis | P | 4.89E+05 | 3.06E+04 | 1 | 0 | over | RPRC007515 |
|------------|---------------------------------------------------------|---|----------|----------|---|---|------|------------|

---

|            |                                                                     |   |          |          |   |   |      |            |
|------------|---------------------------------------------------------------------|---|----------|----------|---|---|------|------------|
| GO:0051343 | positive regulation of cyclic-nucleotide phosphodiesterase activity | P | 4.89E+05 | 3.06E+04 | 1 | 0 | over | RPRC007515 |
|------------|---------------------------------------------------------------------|---|----------|----------|---|---|------|------------|

---

|            |                                   |   |          |          |   |   |      |            |
|------------|-----------------------------------|---|----------|----------|---|---|------|------------|
| GO:0009882 | blue light photoreceptor activity | F | 4.89E+05 | 3.06E+04 | 1 | 0 | over | RPRC005966 |
|------------|-----------------------------------|---|----------|----------|---|---|------|------------|

---

|            |                        |   |          |          |   |   |      |            |
|------------|------------------------|---|----------|----------|---|---|------|------------|
| GO:0051298 | centrosome duplication | P | 4.89E+05 | 3.06E+04 | 1 | 0 | over | RPRC015127 |
|------------|------------------------|---|----------|----------|---|---|------|------------|

---

|            |                              |   |          |          |   |   |      |            |
|------------|------------------------------|---|----------|----------|---|---|------|------------|
| GO:0009785 | blue light signaling pathway | P | 4.89E+05 | 3.06E+04 | 1 | 0 | over | RPRC005966 |
|------------|------------------------------|---|----------|----------|---|---|------|------------|

---

|            |                                        |   |          |          |   |   |      |            |
|------------|----------------------------------------|---|----------|----------|---|---|------|------------|
| GO:0072542 | protein phosphatase activator activity | F | 4.89E+05 | 3.06E+04 | 1 | 0 | over | RPRC007515 |
|------------|----------------------------------------|---|----------|----------|---|---|------|------------|

---

|            |           |   |          |          |   |   |      |            |
|------------|-----------|---|----------|----------|---|---|------|------------|
| GO:0007595 | lactation | P | 4.89E+05 | 3.06E+04 | 1 | 0 | over | RPRC001811 |
|------------|-----------|---|----------|----------|---|---|------|------------|

---

|            |                                                     |   |          |          |   |   |      |            |
|------------|-----------------------------------------------------|---|----------|----------|---|---|------|------------|
| GO:0004838 | L-tyrosine:2-oxoglutarate aminotransferase activity | F | 4.89E+05 | 3.06E+04 | 1 | 0 | over | RPRC000370 |
|------------|-----------------------------------------------------|---|----------|----------|---|---|------|------------|

---

|            |                                                                             |   |          |          |   |     |       |                                                                                                                                                                                                                                                                                                                                                                                                                                                 |
|------------|-----------------------------------------------------------------------------|---|----------|----------|---|-----|-------|-------------------------------------------------------------------------------------------------------------------------------------------------------------------------------------------------------------------------------------------------------------------------------------------------------------------------------------------------------------------------------------------------------------------------------------------------|
| GO:0021762 | substantia nigra development                                                | P | 4.89E+05 | 3.06E+04 | 1 | 0   | over  | RPRC007515                                                                                                                                                                                                                                                                                                                                                                                                                                      |
| GO:0060487 | lung epithelial cell differentiation                                        | P | 4.89E+05 | 3.06E+04 | 1 | 0   | over  | RPRC007515                                                                                                                                                                                                                                                                                                                                                                                                                                      |
| GO:0050679 | positive regulation of epithelial cell proliferation                        | P | 4.89E+05 | 3.06E+04 | 1 | 0   | over  | RPRC001811                                                                                                                                                                                                                                                                                                                                                                                                                                      |
| GO:0071949 | FAD binding                                                                 | F | 4.89E+05 | 3.06E+04 | 1 | 0   | over  | RPRC005966                                                                                                                                                                                                                                                                                                                                                                                                                                      |
| GO:0031492 | nucleosomal DNA binding                                                     | F | 4.89E+05 | 3.06E+04 | 1 | 0   | over  | RPRC008809                                                                                                                                                                                                                                                                                                                                                                                                                                      |
| GO:0031432 | titin binding                                                               | F | 4.89E+05 | 3.06E+04 | 1 | 0   | over  | RPRC007515                                                                                                                                                                                                                                                                                                                                                                                                                                      |
| GO:0060316 | positive regulation of ryanodine-sensitive calcium-release channel activity | P | 4.89E+05 | 3.06E+04 | 1 | 0   | over  | RPRC007515                                                                                                                                                                                                                                                                                                                                                                                                                                      |
| GO:0044255 | cellular lipid metabolic process                                            | P | 5.31E+05 | 3.35E+04 | 0 | 125 | under | RPRC000509, RPRC014327, RPRC000391, RPRC003013, RPRC009385, RPRC003658, RPRC003953, RPRC005070, RPRC004370, RPRC003924, RPRC007045, RPRC007511, RPRC000269, RPRC002703, RPRC013853, RPRC011566, RPRC001513, RPRC010847, RPRC000062, RPRC010421, RPRC004484, RPRC003294, RPRC004460, RPRC011537, RPRC001166, RPRC006830, RPRC004077, RPRC011992, RPRC005747, RPRC009972, RPRC015196, RPRC008232, RPRC000104, RPRC005328, RPRC008853, RPRC003507, |

|            |                                            |   |          |          |   |     |       |                        |                                                                                                                                                                                                                                                                                                                                                                                                                                                                                                                                                                                                                                                                                                                                                                                                                                                                                                                                                                                                                                                                                                                                                                                                                                                                                                                                                                                                                                                                                                                                                                                                                                                   |
|------------|--------------------------------------------|---|----------|----------|---|-----|-------|------------------------|---------------------------------------------------------------------------------------------------------------------------------------------------------------------------------------------------------------------------------------------------------------------------------------------------------------------------------------------------------------------------------------------------------------------------------------------------------------------------------------------------------------------------------------------------------------------------------------------------------------------------------------------------------------------------------------------------------------------------------------------------------------------------------------------------------------------------------------------------------------------------------------------------------------------------------------------------------------------------------------------------------------------------------------------------------------------------------------------------------------------------------------------------------------------------------------------------------------------------------------------------------------------------------------------------------------------------------------------------------------------------------------------------------------------------------------------------------------------------------------------------------------------------------------------------------------------------------------------------------------------------------------------------|
|            |                                            |   |          |          |   |     |       |                        | RPRC013377, RPRC014850, RPRC015462, RPRC005288, RPRC000123, RPRC012853, RPRC008015, RPRC009424, RPRC006183, RPRC010649, RPRC014669, RPRC010944, RPRC011734, RPRC007894, RPRC008855, RPRC000006, RPRC006715, RPRC009774, RPRC008619, RPRC008205, RPRC000544, RPRC006225, RPRC000710, RPRC002838, RPRC007705, RPRC002909, RPRC001317, RPRC004440, RPRC002726, RPRC011103, RPRC011410, RPRC004193, RPRC000741, RPRC015176, RPRC000001, RPRC006889, RPRC007884, RPRC002821, RPRC003718, RPRC009995, RPRC000879, RPRC008881, RPRC000617, RPRC010817, RPRC008657, RPRC012307, RPRC004052, RPRC009588, RPRC013818, RPRC001691, RPRC014188, RPRC011010, RPRC004123, RPRC003666, RPRC000482, RPRC006015, RPRC006310, RPRC009771, RPRC009293, RPRC004106, RPRC014052, RPRC008911, RPRC002528, RPRC012474, RPRC004644, RPRC002835, RPRC012940, RPRC009447, RPRC008109, RPRC005310, RPRC012369, RPRC011669, RPRC002771, RPRC000757, RPRC006886, RPRC008854, RPRC015097, RPRC004037, RPRC011633, RPRC015232, RPRC009454, RPRC014149, RPRC011776, RPRC013987, RPRC009927, RPRC009513, RPRC011764, RPRC013508, RPRC000923                                                                                                                                                                                                                                                                                                                                                                                                                                                                                                                                        |
| GO:0006355 | regulation of transcription, DNA-templated | P | 5.38E+05 | 3.40E+04 | 2 | 238 | under | RPRC007515, RPRC000303 | RPRC001204, RPRC001595, RPRC003870, RPRC004092, RPRC009544, RPRC009946, RPRC003475, RPRC014120, RPRC011695, RPRC000954, RPRC012076, RPRC010976, RPRC005757, RPRC007388, RPRC015365, RPRC012040, RPRC005005, RPRC007842, RPRC008887, RPRC001701, RPRC010462, RPRC005391, RPRC001625, RPRC014334, RPRC005645, RPRC012111, RPRC000026, RPRC002066, RPRC003748, RPRC007347, RPRC006647, RPRC005947, RPRC011554, RPRC001915, RPRC007801, RPRC003819, RPRC010274, RPRC003712, RPRC000737, RPRC005100, RPRC000133, RPRC003051, RPRC001899, RPRC006459, RPRC002817, RPRC003110, RPRC00583-PB, RPRC000583, RPRC000264, RPRC009163, RPRC002220, RPRC010293, RPRC006801, RPRC010281, RPRC007266, RPRC015255, RPRC009234, RPRC001910, RPRC011792, RPRC009636, RPRC011887, RPRC003791, RPRC003886, RPRC008192, RPRC001515, RPRC006478, RPRC012392, RPRC012403, RPRC000951, RPRC004402, RPRC014602, RPRC010188, RPRC006844, RPRC005264, RPRC007468, RPRC014662, RPRC010885, RPRC005973, RPRC002577, RPRC007456, RPRC006183, RPRC008087, RPRC008489, RPRC000437, RPRC015114, RPRC009962, RPRC008636, RPRC015186, RPRC010625, RPRC011161, RPRC007344, RPRC004528, RPRC005785, RPRC007025, RPRC004262, RPRC007173, RPRC001180, RPRC001127, RPRC005932, RPRC012907, RPRC007256, RPRC012429, RPRC003072, RPRC005920, RPRC007244, RPRC002110, RPRC004883, RPRC012796, RPRC005188, RPRC001429, RPRC005513, RPRC012700, RPRC005176, RPRC003681, RPRC007546, RPRC003362, RPRC000853, RPRC009438, RPRC007458, RPRC000936, RPRC012843, RPRC001317, RPRC014174, RPRC007032, RPRC000587, RPRC000025, RPRC011027, RPRC000900, RPRC006499, RPRC001122, RPRC004754, RPRC003811, |



|            |                                                                           |   |          |          |   |   |      |                        |                                                                                                                                                                                                                                                                                                                                                                                                                                                                                                                                                                                                                                                                                                                                                                                                                                                                                                                                                                                                                                                                                                                                                                                                                                                                                                                        |
|------------|---------------------------------------------------------------------------|---|----------|----------|---|---|------|------------------------|------------------------------------------------------------------------------------------------------------------------------------------------------------------------------------------------------------------------------------------------------------------------------------------------------------------------------------------------------------------------------------------------------------------------------------------------------------------------------------------------------------------------------------------------------------------------------------------------------------------------------------------------------------------------------------------------------------------------------------------------------------------------------------------------------------------------------------------------------------------------------------------------------------------------------------------------------------------------------------------------------------------------------------------------------------------------------------------------------------------------------------------------------------------------------------------------------------------------------------------------------------------------------------------------------------------------|
|            |                                                                           |   |          |          |   |   |      |                        | RPRC001058, RPRC001938, RPRC007824, RPRC013788, RPRC008212, RPRC007346, RPRC002774, RPRC000824, RPRC001205, RPRC008698, RPRC015259, RPRC010273, RPRC002750, RPRC007565, RPRC002845, RPRC000239, RPRC009923, RPRC013000, RPRC001336, RPRC005261, RPRC003216, RPRC006848, RPRC008243, RPRC011448, RPRC005006, RPRC001236, RPRC004868, RPRC011914, RPRC002486, RPRC014104, RPRC007938, RPRC008019, RPRC010782, RPRC006092, RPRC002781, RPRC000767, RPRC009416, RPRC011667, RPRC003985, RPRC005805, RPRC001614, RPRC002693, RPRC010841, RPRC001993, RPRC012172, RPRC006151, RPRC010617, RPRC003790, RPRC011714, RPRC012964, RPRC009706, RPRC008357, RPRC010410, RPRC009766, RPRC011455, RPRC000282, RPRC007691, RPRC004875, RPRC015149, RPRC006660, RPRC009188, RPRC003111, RPRC011916, RPRC014254, RPRC013311, RPRC001852, RPRC001788, RPRC006094, RPRC007981, RPRC000496, RPRC002559, RPRC015268, RPRC014154, RPRC007267, RPRC001031, RPRC012906, RPRC000881, RPRC007000, RPRC010289, RPRC001186, RPRC005115, RPRC003461, RPRC015156, RPRC002606, RPRC010679, RPRC009271, RPRC004953, RPRC012157, RPRC004327, RPRC014273, RPRC013330, RPRC006379, RPRC008411, RPRC001871, RPRC004156, RPRC005003, RPRC008737, RPRC002164, RPRC005484, RPRC006502, RPRC011971, RPRC007274, RPRC015422, RPRC004192, RPRC004351, RPRC014392 |
| GO:0000162 | tryptophan biosynthetic process                                           | P | 6.47E+05 | 4.28E+04 | 2 | 9 | over | RPRC000370, RPRC003270 | RPRC009777, RPRC004312, RPRC015309, RPRC013484, RPRC000810, RPRC012146, RPRC015259, RPRC007672, RPRC000840                                                                                                                                                                                                                                                                                                                                                                                                                                                                                                                                                                                                                                                                                                                                                                                                                                                                                                                                                                                                                                                                                                                                                                                                             |
| GO:0006571 | tyrosine biosynthetic process                                             | P | 6.47E+05 | 4.28E+04 | 2 | 9 | over | RPRC000370, RPRC003270 | RPRC009777, RPRC004312, RPRC015309, RPRC013484, RPRC000810, RPRC012146, RPRC015259, RPRC007672, RPRC000840                                                                                                                                                                                                                                                                                                                                                                                                                                                                                                                                                                                                                                                                                                                                                                                                                                                                                                                                                                                                                                                                                                                                                                                                             |
| GO:0033177 | proton-transporting two-sector ATPase complex, proton-transporting domain | C | 6.47E+05 | 4.28E+04 | 2 | 9 | over | RPRC006543, RPRC010550 | RPRC013834, RPRC005881, RPRC008403, RPRC015179, RPRC001199, RPRC008312, RPRC005989, RPRC007426, RPRC001198                                                                                                                                                                                                                                                                                                                                                                                                                                                                                                                                                                                                                                                                                                                                                                                                                                                                                                                                                                                                                                                                                                                                                                                                             |
| GO:0009094 | L-phenylalanine biosynthetic process                                      | P | 6.47E+05 | 4.28E+04 | 2 | 9 | over | RPRC000370, RPRC003270 | RPRC009777, RPRC004312, RPRC015309, RPRC013484, RPRC000810, RPRC012146, RPRC015259, RPRC007672, RPRC000840                                                                                                                                                                                                                                                                                                                                                                                                                                                                                                                                                                                                                                                                                                                                                                                                                                                                                                                                                                                                                                                                                                                                                                                                             |

|            |                                        |   |          |          |   |    |      |                                                |                                                                                                                                                                                                                                                                                                                                                                                                                                                                                                |
|------------|----------------------------------------|---|----------|----------|---|----|------|------------------------------------------------|------------------------------------------------------------------------------------------------------------------------------------------------------------------------------------------------------------------------------------------------------------------------------------------------------------------------------------------------------------------------------------------------------------------------------------------------------------------------------------------------|
| GO:0019904 | protein domain specific binding        | F | 6.47E+05 | 4.28E+04 | 2 | 9  | over | RPRC007515, RPRC011742                         | RPRC011237, RPRC011822, RPRC008500, RPRC003362, RPRC008219, RPRC001496, RPRC010679, RPRC013325, RPRC012128                                                                                                                                                                                                                                                                                                                                                                                     |
| GO:0006446 | regulation of translational initiation | P | 6.65E+05 | 4.45E+04 | 4 | 40 | over | RPRC013802, RPRC002700, RPRC006840, RPRC010378 | RPRC009699, RPRC009587, RPRC002208, RPRC006459, RPRC001018, RPRC006116, RPRC003914, RPRC013955, RPRC013696, RPRC000566, RPRC014786, RPRC006478, RPRC001101, RPRC012870, RPRC006844, RPRC004935, RPRC006903, RPRC004362, RPRC011953, RPRC010218, RPRC003864, RPRC010290, RPRC006499, RPRC013852, RPRC001448, RPRC007334, RPRC015147, RPRC010634, RPRC007926, RPRC007607, RPRC008557, RPRC003801, RPRC004922, RPRC004846, RPRC015292, RPRC007462, RPRC003851, RPRC007923, RPRC014905, RPRC002383 |
| GO:0003743 | translation initiation factor activity | F | 6.65E+05 | 4.45E+04 | 4 | 40 | over | RPRC013802, RPRC002700, RPRC006840, RPRC010378 | RPRC009699, RPRC009587, RPRC002208, RPRC006459, RPRC001018, RPRC006116, RPRC003914, RPRC013955, RPRC013696, RPRC000566, RPRC014786, RPRC006478, RPRC001101, RPRC012870, RPRC006844, RPRC004935, RPRC006903, RPRC004362, RPRC011953, RPRC010218, RPRC003864, RPRC010290, RPRC006499, RPRC013852, RPRC001448, RPRC007334, RPRC015147, RPRC010634, RPRC007926, RPRC007607, RPRC008557, RPRC003801, RPRC004922, RPRC004846, RPRC015292, RPRC007462, RPRC003851, RPRC007923, RPRC014905, RPRC002383 |
| GO:0016209 | antioxidant activity                   | F | 7.11E+05 | 4.82E+03 | 3 | 24 | over | RPRC002923, RPRC015388, RPRC006756             | RPRC009934, RPRC007595, RPRC007347, RPRC014110, RPRC012922, RPRC007468, RPRC007213, RPRC000982, RPRC011108, RPRC007344, RPRC009148, RPRC004883, RPRC005064, RPRC007907, RPRC011796, RPRC015195, RPRC011500, RPRC000422-PB, RPRC015401, RPRC007484, RPRC015008, RPRC004965, RPRC004717, RPRC011126                                                                                                                                                                                              |

## GO annotation terms for enriched transcripts in male library

| GO-ID      | Term                                   | Category* | FDR      | P-Value  | N° of genes in dataset D.E. | N° of genes in <i>R. prolixus</i> genome | Over/Under represented | VectorBase code of genes dataset D.E.                                                                                                                                                                                                                                                                                                                                                                                  | VectorBase code of genes in <i>R. prolixus</i> genome                                                                                                                                                                                                                                                                                                                                                                                                                                                                                                                                                                                                                                                                  |
|------------|----------------------------------------|-----------|----------|----------|-----------------------------|------------------------------------------|------------------------|------------------------------------------------------------------------------------------------------------------------------------------------------------------------------------------------------------------------------------------------------------------------------------------------------------------------------------------------------------------------------------------------------------------------|------------------------------------------------------------------------------------------------------------------------------------------------------------------------------------------------------------------------------------------------------------------------------------------------------------------------------------------------------------------------------------------------------------------------------------------------------------------------------------------------------------------------------------------------------------------------------------------------------------------------------------------------------------------------------------------------------------------------|
| GO:0003735 | structural constituent of ribosome     | F         | 1.26E-27 | 4.28E-31 | 34                          | 58                                       | over                   | RPRC013077, RPRC010378, RPRC010853, RPRC005980, RPRC002470, RPRC003510, RPRC010146, RPRC007328, RPRC005430, RPRC014363, RPRC005701, RPRC013167, RPRC012162, RPRC012542, RPRC000499, RPRC006329, RPRC012387, RPRC011937, RPRC009189, RPRC014845, RPRC014419, RPRC010286, RPRC011596, RPRC009337, RPRC007230, RPRC012158, RPRC013146, RPRC009702, RPRC015127, RPRC003327, RPRC012354, RPRC013504, RPRC002923, RPRC002544 | RPRC006309, RPRC008799, RPRC007825, RPRC002520, RPRC014365, RPRC002822, RPRC007856, RPRC009039, RPRC004296, RPRC011999, RPRC015409, RPRC012941, RPRC011456, RPRC002505, RPRC012363, RPRC000922, RPRC006118, RPRC014793, RPRC013786, RPRC004269, RPRC012784, RPRC007451, RPRC006758, RPRC012353, RPRC008479, RPRC010054, RPRC006392, RPRC000972, RPRC003014, RPRC002869, RPRC009716, RPRC002698, RPRC005011, RPRC009871, RPRC010192, RPRC012072, RPRC006051, RPRC012633, RPRC013169, RPRC010872, RPRC011260, RPRC010405, RPRC003768, RPRC003980, RPRC005724, RPRC006974, RPRC009873, RPRC013371, RPRC014620, RPRC015001, RPRC005389, RPRC012711, RPRC002897, RPRC004303, RPRC001328, RPRC014587, RPRC010809, RPRC013851 |
| GO:0022627 | cytosolic small ribosomal subunit      | C         | 2.23E+01 | 1.21E-02 | 4                           | 0                                        | over                   | RPRC010146, RPRC000499, RPRC013504, RPRC002923                                                                                                                                                                                                                                                                                                                                                                         |                                                                                                                                                                                                                                                                                                                                                                                                                                                                                                                                                                                                                                                                                                                        |
| GO:0005549 | odorant binding                        | F         | 8.94E+00 | 5.16E-01 | 5                           | 5                                        | over                   | RPRC009905, RPRC000174, RPRC004407, RPRC004408, RPRC010284                                                                                                                                                                                                                                                                                                                                                             | RPRC000274, RPRC000476, RPRC010357, RPRC000378, RPRC014985                                                                                                                                                                                                                                                                                                                                                                                                                                                                                                                                                                                                                                                             |
| GO:0070062 | extracellular exosome                  | C         | 3.91E+02 | 2.52E+00 | 5                           | 8                                        | over                   | RPRC012247, RPRC001811, RPRC008809, RPRC005383, RPRC007515                                                                                                                                                                                                                                                                                                                                                             | RPRC015027, RPRC012892, RPRC007468, RPRC009243, RPRC011182, RPRC006358, RPRC000881, RPRC000267                                                                                                                                                                                                                                                                                                                                                                                                                                                                                                                                                                                                                         |
| GO:0005200 | structural constituent of cytoskeleton | F         | 8.00E+02 | 5.71E+00 | 5                           | 10                                       | over                   | RPRC005383, RPRC003672, RPRC010283, RPRC009875, RPRC007667                                                                                                                                                                                                                                                                                                                                                             | RPRC014380, RPRC014377, RPRC004762, RPRC005328, RPRC011694, RPRC008372, RPRC008343, RPRC003842, RPRC015390, RPRC000816                                                                                                                                                                                                                                                                                                                                                                                                                                                                                                                                                                                                 |
| GO:0003924 | GTPase activity                        | F         | 1.33E+04 | 1.08E+02 | 7                           | 52                                       | over                   | RPRC015041, RPRC005383, RPRC003672, RPRC010283, RPRC012140, RPRC012142, RPRC007667                                                                                                                                                                                                                                                                                                                                     | RPRC014380, RPRC013503, RPRC015134, RPRC004755, RPRC005628, RPRC011076, RPRC005457, RPRC014377, RPRC005906, RPRC013292, RPRC004762, RPRC009003, RPRC011142, RPRC014184, RPRC008979, RPRC001144, RPRC001275, RPRC008122, RPRC001582, RPRC003793, RPRC011694, RPRC015352, RPRC009331, RPRC006970, RPRC007358, RPRC008372, RPRC001448, RPRC003416, RPRC011075, RPRC000800, RPRC012714, RPRC003842, RPRC014240, RPRC006334, RPRC002143, RPRC005936, RPRC005351, RPRC003442, RPRC005505, RPRC013790, RPRC000348, RPRC014951, RPRC004368, RPRC008854, RPRC013366, RPRC000816, RPRC015292, RPRC008666, RPRC002028, RPRC011274, RPRC012204, RPRC007250                                                                         |

|            |                                        |   |          |          |   |     |      |                                                                                                            |                                                                                                                                                                                                                                                                                                                                                                                                                                                                                                                                                                                                                                                                                                                                                                                                                                                                                                                                                                                                                                                                                                                                                                                                                                                                                                                                                                                                                                                                                                            |
|------------|----------------------------------------|---|----------|----------|---|-----|------|------------------------------------------------------------------------------------------------------------|------------------------------------------------------------------------------------------------------------------------------------------------------------------------------------------------------------------------------------------------------------------------------------------------------------------------------------------------------------------------------------------------------------------------------------------------------------------------------------------------------------------------------------------------------------------------------------------------------------------------------------------------------------------------------------------------------------------------------------------------------------------------------------------------------------------------------------------------------------------------------------------------------------------------------------------------------------------------------------------------------------------------------------------------------------------------------------------------------------------------------------------------------------------------------------------------------------------------------------------------------------------------------------------------------------------------------------------------------------------------------------------------------------------------------------------------------------------------------------------------------------|
| GO:0003746 | translation elongation factor activity | F | 3.94E+04 | 3.78E+02 | 4 | 15  | over | RPRC015041, RPRC007684, RPRC012140, RPRC012142                                                             | RPRC012040, RPRC012111, RPRC013273, RPRC011076, RPRC009039, RPRC003914, RPRC007456, RPRC001582, RPRC005473, RPRC011027, RPRC002143, RPRC005936, RPRC002752, RPRC005351, RPRC011916                                                                                                                                                                                                                                                                                                                                                                                                                                                                                                                                                                                                                                                                                                                                                                                                                                                                                                                                                                                                                                                                                                                                                                                                                                                                                                                         |
| GO:0051258 | protein polymerization                 | P | 5.56E+04 | 5.67E+02 | 4 | 17  | over | RPRC005383, RPRC003672, RPRC010283, RPRC007667                                                             | RPRC014380, RPRC011530, RPRC014377, RPRC011608, RPRC004762, RPRC011142, RPRC013158, RPRC005737, RPRC005939, RPRC011694, RPRC011753, RPRC008372, RPRC004637, RPRC003842, RPRC003459, RPRC015390, RPRC000816                                                                                                                                                                                                                                                                                                                                                                                                                                                                                                                                                                                                                                                                                                                                                                                                                                                                                                                                                                                                                                                                                                                                                                                                                                                                                                 |
| GO:0005525 | GTP binding                            | F | 6.79E+04 | 7.24E+02 | 9 | 121 | over | RPRC015041, RPRC001811, RPRC005383, RPRC003672, RPRC015257, RPRC010283, RPRC012140, RPRC012142, RPRC007667 | RPRC014380, RPRC011062, RPRC015453, RPRC013503, RPRC015134, RPRC005498, RPRC008142, RPRC004755, RPRC005852, RPRC013261, RPRC007642, RPRC005628, RPRC011076, RPRC005457, RPRC003955, RPRC010209, RPRC014377, RPRC010918, RPRC003772, RPRC006830, RPRC013168, RPRC005906, RPRC013292, RPRC004762, RPRC009003, RPRC008853, RPRC012492, RPRC015391, RPRC013377, RPRC007644, RPRC010913, RPRC010340, RPRC011142, RPRC003248, RPRC003065, RPRC004007, RPRC007066, RPRC005518, RPRC014184, RPRC008979, RPRC001144, RPRC008553, RPRC010076, RPRC001275, RPRC014716, RPRC008122, RPRC001582, RPRC003793, RPRC011694, RPRC005832, RPRC011936, RPRC015352, RPRC009331, RPRC006970, RPRC014014, RPRC009243, RPRC007358, RPRC008372, RPRC001448, RPRC011075, RPRC000800, RPRC012714, RPRC010563, RPRC003842, RPRC015449, RPRC009576, RPRC014240, RPRC008314, RPRC007034, RPRC005889, RPRC006334, RPRC002143, RPRC007838, RPRC013286, RPRC007643, RPRC007802, RPRC004106, RPRC014052, RPRC004254, RPRC005936, RPRC005351, RPRC012940, RPRC006938, RPRC009742, RPRC011124, RPRC003442, RPRC002735, RPRC005505, RPRC013790, RPRC015125, RPRC005482, RPRC005553, RPRC000348, RPRC014951, RPRC004368, RPRC006886, RPRC008854, RPRC003337, RPRC009223, RPRC015392, RPRC013366, RPRC000816, RPRC011864, RPRC013915, RPRC015292, RPRC004710, RPRC004646, RPRC008666, RPRC014910, RPRC008081, RPRC014929, RPRC002028, RPRC013508, RPRC011274, RPRC006184, RPRC004629, RPRC012204, RPRC000267, RPRC003970, RPRC003344, RPRC007250 |
| GO:0006448 | regulation of translational elongation | P | 8.22E+04 | 9.64E+02 | 4 | 20  | over | RPRC015041, RPRC007684, RPRC012140, RPRC012142                                                             | RPRC012040, RPRC014027, RPRC012111, RPRC013273, RPRC011076, RPRC009039, RPRC003914, RPRC015450, RPRC007456, RPRC001582, RPRC005473, RPRC011027, RPRC002143, RPRC005280, RPRC005936, RPRC002752, RPRC005351, RPRC011916, RPRC012971, RPRC008081                                                                                                                                                                                                                                                                                                                                                                                                                                                                                                                                                                                                                                                                                                                                                                                                                                                                                                                                                                                                                                                                                                                                                                                                                                                             |
| GO:0005874 | microtubule                            | C | 1.09E+05 | 1.34E+03 | 5 | 39  | over | RPRC005383, RPRC003672, RPRC010283, RPRC007515, RPRC007667                                                 | RPRC014380, RPRC004943, RPRC011176, RPRC014377, RPRC010393, RPRC004762, RPRC013227, RPRC002789, RPRC004988, RPRC011142, RPRC010423, RPRC014833, RPRC002641, RPRC010968, RPRC005737, RPRC001777, RPRC006473, RPRC011694, RPRC003935, RPRC004459, RPRC008372, RPRC012400, RPRC005456, RPRC002928, RPRC011282, RPRC003842, RPRC011177, RPRC015106, RPRC009316, RPRC005789, RPRC001728, RPRC005417, RPRC015439, RPRC010046, RPRC000816, RPRC004870, RPRC012381, RPRC013987, RPRC001778                                                                                                                                                                                                                                                                                                                                                                                                                                                                                                                                                                                                                                                                                                                                                                                                                                                                                                                                                                                                                         |

|            |                                                          |   |          |          |   |    |      |                                                            |                                                                                                                                                                                                                                                                                                                                                                                                                                                                                                                                                                                                                                                                                                                                                                                                                                                                                                |
|------------|----------------------------------------------------------|---|----------|----------|---|----|------|------------------------------------------------------------|------------------------------------------------------------------------------------------------------------------------------------------------------------------------------------------------------------------------------------------------------------------------------------------------------------------------------------------------------------------------------------------------------------------------------------------------------------------------------------------------------------------------------------------------------------------------------------------------------------------------------------------------------------------------------------------------------------------------------------------------------------------------------------------------------------------------------------------------------------------------------------------------|
| GO:0019843 | rRNA binding                                             | F | 4.89E+04 | 9.24E+03 | 2 | 6  | over | RPRC012542, RPRC011596                                     | RPRC006783, RPRC014793, RPRC008479, RPRC012633, RPRC011272, RPRC013371                                                                                                                                                                                                                                                                                                                                                                                                                                                                                                                                                                                                                                                                                                                                                                                                                         |
| GO:0031966 | mitochondrial membrane                                   | C | 4.89E+04 | 1.49E+04 | 5 | 72 | over | RPRC012468, RPRC009600, RPRC008679, RPRC014245, RPRC008827 | RPRC002932, RPRC007811, RPRC005212, RPRC013687, RPRC010550, RPRC007228, RPRC014199, RPRC008337, RPRC005338, RPRC011666, RPRC005457, RPRC001573, RPRC014843, RPRC009203, RPRC013972, RPRC014986, RPRC002403, RPRC004686, RPRC014579, RPRC007118, RPRC013180, RPRC011887, RPRC012256, RPRC011461, RPRC010901, RPRC012073, RPRC014200, RPRC010093, RPRC014686, RPRC014196, RPRC009424, RPRC004840, RPRC006892, RPRC007427, RPRC001996, RPRC007829, RPRC004174, RPRC006787, RPRC006213, RPRC000054, RPRC014752, RPRC000615, RPRC008312, RPRC007996, RPRC012755, RPRC002614, RPRC004785, RPRC005989, RPRC001714, RPRC006310, RPRC007507, RPRC014920, RPRC003690, RPRC013678, RPRC005912, RPRC015468, RPRC005505, RPRC005736, RPRC004687, RPRC013690, RPRC003118, RPRC007669, RPRC008997, RPRC005092, RPRC003301, RPRC010094, RPRC008335, RPRC009254, RPRC009413, RPRC006976, RPRC009230, RPRC002637 |
| GO:0019904 | protein domain specific binding                          | F | 4.89E+04 | 1.75E+04 | 2 | 9  | over | RPRC007515, RPRC011742                                     | RPRC011237, RPRC011822, RPRC008500, RPRC003362, RPRC008219, RPRC001496, RPRC010679, RPRC013325, RPRC012128                                                                                                                                                                                                                                                                                                                                                                                                                                                                                                                                                                                                                                                                                                                                                                                     |
| GO:0035690 | cellular response to drug                                | P | 4.89E+04 | 1.90E+02 | 1 | 0  | over | RPRC007515                                                 |                                                                                                                                                                                                                                                                                                                                                                                                                                                                                                                                                                                                                                                                                                                                                                                                                                                                                                |
| GO:0043274 | phospholipase binding                                    | F | 4.89E+04 | 1.90E+02 | 1 | 0  | over | RPRC007515                                                 |                                                                                                                                                                                                                                                                                                                                                                                                                                                                                                                                                                                                                                                                                                                                                                                                                                                                                                |
| GO:0001837 | epithelial to mesenchymal transition                     | P | 4.89E+04 | 1.90E+02 | 1 | 0  | over | RPRC007515                                                 |                                                                                                                                                                                                                                                                                                                                                                                                                                                                                                                                                                                                                                                                                                                                                                                                                                                                                                |
| GO:0055117 | regulation of cardiac muscle contraction                 | P | 4.89E+04 | 1.90E+02 | 1 | 0  | over | RPRC007515                                                 |                                                                                                                                                                                                                                                                                                                                                                                                                                                                                                                                                                                                                                                                                                                                                                                                                                                                                                |
| GO:0000028 | ribosomal small subunit assembly                         | P | 4.89E+04 | 1.90E+02 | 1 | 0  | over | RPRC000499                                                 |                                                                                                                                                                                                                                                                                                                                                                                                                                                                                                                                                                                                                                                                                                                                                                                                                                                                                                |
| GO:0060079 | regulation of excitatory postsynaptic membrane potential | P | 4.89E+04 | 1.90E+02 | 1 | 0  | over | RPRC007515                                                 |                                                                                                                                                                                                                                                                                                                                                                                                                                                                                                                                                                                                                                                                                                                                                                                                                                                                                                |
| GO:0003958 | NADPH-hemoprotein reductase activity                     | F | 4.89E+04 | 1.90E+02 | 1 | 0  | over | RPRC005729                                                 |                                                                                                                                                                                                                                                                                                                                                                                                                                                                                                                                                                                                                                                                                                                                                                                                                                                                                                |

|            |                                                                                         |   |          |          |   |   |      |            |
|------------|-----------------------------------------------------------------------------------------|---|----------|----------|---|---|------|------------|
| GO:0043024 | ribosomal small subunit binding                                                         | F | 4.89E+04 | 1.90E+02 | 1 | 0 | over | RPRC001811 |
| GO:0010992 | ubiquitin homeostasis                                                                   | P | 4.89E+04 | 1.90E+02 | 1 | 0 | over | RPRC012247 |
| GO:0033192 | calmodulin-dependent protein phosphatase activity                                       | F | 4.89E+04 | 1.90E+02 | 1 | 0 | over | RPRC007515 |
| GO:0006407 | rRNA export from nucleus                                                                | P | 4.89E+04 | 1.90E+02 | 1 | 0 | over | RPRC010146 |
| GO:0033173 | calcineurin-NFAT signaling cascade                                                      | P | 4.89E+04 | 1.90E+02 | 1 | 0 | over | RPRC007515 |
| GO:0035307 | positive regulation of protein dephosphorylation                                        | P | 4.89E+04 | 1.90E+02 | 1 | 0 | over | RPRC007515 |
| GO:0001569 | patterning of blood vessels                                                             | P | 4.89E+04 | 1.90E+02 | 1 | 0 | over | RPRC007515 |
| GO:0010880 | regulation of release of sequestered calcium ion into cytosol by sarcoplasmic reticulum | P | 4.89E+04 | 1.90E+02 | 1 | 0 | over | RPRC007515 |
| GO:0071333 | cellular response to glucose stimulus                                                   | P | 4.89E+04 | 1.90E+02 | 1 | 0 | over | RPRC007515 |
| GO:0006336 | DNA replication-independent nucleosome assembly                                         | P | 4.89E+04 | 1.90E+02 | 1 | 0 | over | RPRC008809 |
| GO:0042383 | sarcolemma                                                                              | C | 4.89E+04 | 1.90E+02 | 1 | 0 | over | RPRC007515 |
| GO:0032587 | ruffle membrane                                                                         | C | 4.89E+04 | 1.90E+02 | 1 | 0 | over | RPRC001811 |
| GO:0032516 | positive regulation of phosphoprotein phosphatase activity                              | P | 4.89E+04 | 1.90E+02 | 1 | 0 | over | RPRC007515 |

|            |                                                                     |   |          |          |   |   |      |            |
|------------|---------------------------------------------------------------------|---|----------|----------|---|---|------|------------|
| GO:0046676 | negative regulation of insulin secretion                            | P | 4.89E+04 | 1.90E+02 | 1 | 0 | over | RPRC007515 |
| GO:0031997 | N-terminal myristoylation domain binding                            | F | 4.89E+04 | 1.90E+02 | 1 | 0 | over | RPRC007515 |
| GO:0031996 | thioesterase binding                                                | F | 4.89E+04 | 1.90E+02 | 1 | 0 | over | RPRC007515 |
| GO:0048741 | skeletal muscle fiber development                                   | P | 4.89E+04 | 1.90E+02 | 1 | 0 | over | RPRC007515 |
| GO:0000788 | nuclear nucleosome                                                  | C | 4.89E+04 | 1.90E+02 | 1 | 0 | over | RPRC008809 |
| GO:0005513 | detection of calcium ion                                            | P | 4.89E+04 | 1.90E+02 | 1 | 0 | over | RPRC007515 |
| GO:0014883 | transition between fast and slow fiber                              | P | 4.89E+04 | 1.90E+02 | 1 | 0 | over | RPRC007515 |
| GO:0045955 | negative regulation of calcium ion-dependent exocytosis             | P | 4.89E+04 | 1.90E+02 | 1 | 0 | over | RPRC007515 |
| GO:0051343 | positive regulation of cyclic-nucleotide phosphodiesterase activity | P | 4.89E+04 | 1.90E+02 | 1 | 0 | over | RPRC007515 |
| GO:0009882 | blue light photoreceptor activity                                   | F | 4.89E+04 | 1.90E+02 | 1 | 0 | over | RPRC005966 |
| GO:0051298 | centrosome duplication                                              | P | 4.89E+04 | 1.90E+02 | 1 | 0 | over | RPRC015127 |
| GO:0009785 | blue light signaling pathway                                        | P | 4.89E+04 | 1.90E+02 | 1 | 0 | over | RPRC005966 |
| GO:0072542 | protein phosphatase activator activity                              | F | 4.89E+04 | 1.90E+02 | 1 | 0 | over | RPRC007515 |

|            |                                                                             |   |          |          |   |     |       |                                                                                                                                                                                                                                                                                                                                                                                                                                                                                                                                                                                                                                                                                                                                                                                                                                                                                                                                                 |
|------------|-----------------------------------------------------------------------------|---|----------|----------|---|-----|-------|-------------------------------------------------------------------------------------------------------------------------------------------------------------------------------------------------------------------------------------------------------------------------------------------------------------------------------------------------------------------------------------------------------------------------------------------------------------------------------------------------------------------------------------------------------------------------------------------------------------------------------------------------------------------------------------------------------------------------------------------------------------------------------------------------------------------------------------------------------------------------------------------------------------------------------------------------|
| GO:0007595 | lactation                                                                   | P | 4.89E+04 | 1.90E+02 | 1 | 0   | over  | RPRC001811                                                                                                                                                                                                                                                                                                                                                                                                                                                                                                                                                                                                                                                                                                                                                                                                                                                                                                                                      |
| GO:0004838 | L-tyrosine:2-oxoglutarate aminotransferase activity                         | F | 4.89E+04 | 1.90E+02 | 1 | 0   | over  | RPRC000370                                                                                                                                                                                                                                                                                                                                                                                                                                                                                                                                                                                                                                                                                                                                                                                                                                                                                                                                      |
| GO:0021762 | substantia nigra development                                                | P | 4.89E+04 | 1.90E+02 | 1 | 0   | over  | RPRC007515                                                                                                                                                                                                                                                                                                                                                                                                                                                                                                                                                                                                                                                                                                                                                                                                                                                                                                                                      |
| GO:0060487 | lung epithelial cell differentiation                                        | P | 4.89E+04 | 1.90E+02 | 1 | 0   | over  | RPRC007515                                                                                                                                                                                                                                                                                                                                                                                                                                                                                                                                                                                                                                                                                                                                                                                                                                                                                                                                      |
| GO:0050679 | positive regulation of epithelial cell proliferation                        | P | 4.89E+04 | 1.90E+02 | 1 | 0   | over  | RPRC001811                                                                                                                                                                                                                                                                                                                                                                                                                                                                                                                                                                                                                                                                                                                                                                                                                                                                                                                                      |
| GO:0071949 | FAD binding                                                                 | F | 4.89E+04 | 1.90E+02 | 1 | 0   | over  | RPRC005966                                                                                                                                                                                                                                                                                                                                                                                                                                                                                                                                                                                                                                                                                                                                                                                                                                                                                                                                      |
| GO:0031492 | nucleosomal DNA binding                                                     | F | 4.89E+04 | 1.90E+02 | 1 | 0   | over  | RPRC008809                                                                                                                                                                                                                                                                                                                                                                                                                                                                                                                                                                                                                                                                                                                                                                                                                                                                                                                                      |
| GO:0031432 | titin binding                                                               | F | 4.89E+04 | 1.90E+02 | 1 | 0   | over  | RPRC007515                                                                                                                                                                                                                                                                                                                                                                                                                                                                                                                                                                                                                                                                                                                                                                                                                                                                                                                                      |
| GO:0060316 | positive regulation of ryanodine-sensitive calcium-release channel activity | P | 4.89E+04 | 1.90E+02 | 1 | 0   | over  | RPRC007515                                                                                                                                                                                                                                                                                                                                                                                                                                                                                                                                                                                                                                                                                                                                                                                                                                                                                                                                      |
| GO:0015405 | P-P-bond-hydrolysis-driven transmembrane transporter activity               | F | 5.29E+05 | 2.10E+04 | 4 | 52  | over  | RPRC003672, RPRC011931, RPRC010283, RPRC008827, RPRC005058, RPRC000735, RPRC007564, RPRC009520, RPRC006226, RPRC000681, RPRC005207, RPRC003694, RPRC013230, RPRC010550, RPRC006811, RPRC011093, RPRC003410, RPRC014158, RPRC010031, RPRC010516, RPRC014377, RPRC005604, RPRC006069, RPRC007159, RPRC002303, RPRC014874, RPRC014798, RPRC012073, RPRC001782, RPRC000668, RPRC002063, RPRC002938, RPRC000444, RPRC004866, RPRC004849, RPRC003978, RPRC014771, RPRC008833, RPRC005592, RPRC005917, RPRC008498, RPRC005989, RPRC000180, RPRC005499, RPRC007341, RPRC002302, RPRC002676, RPRC013435, RPRC001633, RPRC001781, RPRC005494, RPRC010075, RPRC009283, RPRC009992, RPRC015363, RPRC003113, RPRC000167, RPRC007014, RPRC001021, RPRC014610, RPRC014789, RPRC001666, RPRC015063, RPRC002513, RPRC007221, RPRC014924, RPRC013917, RPRC001790, RPRC003853, RPRC004234, RPRC006286, RPRC012318, RPRC005491, RPRC003777, RPRC012932, RPRC010391, |
| GO:0004672 | protein kinase activity                                                     | F | 5.70E+05 | 2.28E+03 | 0 | 234 | under |                                                                                                                                                                                                                                                                                                                                                                                                                                                                                                                                                                                                                                                                                                                                                                                                                                                                                                                                                 |



RPRC011204, RPRC007535, RPRC004772, RPRC008485,  
RPRC012856, RPRC009810, RPRC001637, RPRC002018,  
RPRC013487, RPRC008863, RPRC005633, RPRC000333,  
RPRC004767, RPRC000576, RPRC008787, RPRC013865,  
RPRC002851, RPRC000321, RPRC009634, RPRC006659,  
RPRC003907, RPRC008054, RPRC011471, RPRC008213,  
RPRC000404, RPRC007813, RPRC005852, RPRC000961,  
RPRC001330, RPRC013013, RPRC004886, RPRC002420,  
RPRC011932, RPRC011211, RPRC012556, RPRC003051,  
RPRC005528, RPRC011920, RPRC001792, RPRC008734,  
RPRC005019, RPRC012934, RPRC004319, RPRC008551,  
RPRC015112, RPRC007939, RPRC001692, RPRC004857,  
RPRC012994, RPRC004538, RPRC001149, RPRC007035,  
RPRC007915, RPRC013044, RPRC007732, RPRC000839,  
RPRC009931, RPRC004881, RPRC000803, RPRC003862,  
RPRC013175, RPRC014709, RPRC006868, RPRC011946,  
RPRC000625, RPRC015450, RPRC002358, RPRC006442,  
RPRC000863, RPRC014526, RPRC008334, RPRC013655,  
RPRC011910, RPRC010713, RPRC011822, RPRC011917,  
RPRC001610, RPRC010542, RPRC007432, RPRC010785,  
RPRC006668, RPRC008784, RPRC010466, RPRC006390,  
RPRC005057, RPRC012505, RPRC002282, RPRC008684,  
RPRC001741, RPRC012099, RPRC013105, RPRC014214,  
RPRC012489, RPRC002914, RPRC014191, RPRC014923,  
RPRC009431, RPRC013438, RPRC000699, RPRC007546,  
RPRC008560, RPRC014676, RPRC009184, RPRC008241,  
RPRC005266, RPRC008336, RPRC009893, RPRC001329,  
RPRC005349, RPRC006894, RPRC011919, RPRC014321,  
RPRC002957, RPRC011736, RPRC007812, RPRC012412,  
RPRC013036, RPRC006941, RPRC000736, RPRC004483,  
RPRC005095, RPRC012077, RPRC003304, RPRC012957,  
RPRC002438, RPRC002012, RPRC014583, RPRC002498,  
RPRC001555, RPRC007441, RPRC008402, RPRC001141,  
RPRC012200, RPRC007991, RPRC011277, RPRC006251,  
RPRC003276, RPRC011265, RPRC001869, RPRC009002,  
RPRC006429, RPRC001857, RPRC005941, RPRC001750,  
RPRC008628, RPRC013126, RPRC006860, RPRC015071,  
RPRC014223, RPRC007336, RPRC000814, RPRC010180,  
RPRC012179, RPRC007631, RPRC006548, RPRC004230,  
RPRC001255, RPRC013098, RPRC006377, RPRC000862,  
RPRC000798, RPRC002038, RPRC014525, RPRC014832,  
RPRC013495, RPRC001940, RPRC010394, RPRC007591,  
RPRC005429, RPRC005800, RPRC008233, RPRC001693,  
RPRC010636, RPRC001226, RPRC003744, RPRC015332,  
RPRC013371, RPRC010612, RPRC001202, RPRC010134,  
RPRC001286, RPRC004208, RPRC007119, RPRC012588,  
RPRC010991, RPRC014715, RPRC004344, RPRC001740,  
RPRC000881, RPRC013601, RPRC000248, RPRC014787,  
RPRC001102, RPRC003727, RPRC004097, RPRC011545,  
RPRC000467, RPRC009939, RPRC007079, RPRC000864,  
RPRC007788, RPRC001488, RPRC009342, RPRC013497,  
RPRC013140, RPRC011911, RPRC006207, RPRC015139,  
RPRC004705, RPRC003273, RPRC000184-PB, RPRC000184,  
RPRC008406, RPRC006669

|            |                                   |   |          |          |   |     |       |                                    |                                                                                                                                                                                                                                                                                                                                                                                                                                                                                                                                                                                                                                                                                                                                                                                                                                                                                                                                                                                                                                                                                                                                                                                                                                                                                                                                                                                                                                                                                                                                                                                                                                                                                                                                                                                                                                                                                                                                                                                                                                                                                                                                                                                                                                                                                                                                                |
|------------|-----------------------------------|---|----------|----------|---|-----|-------|------------------------------------|------------------------------------------------------------------------------------------------------------------------------------------------------------------------------------------------------------------------------------------------------------------------------------------------------------------------------------------------------------------------------------------------------------------------------------------------------------------------------------------------------------------------------------------------------------------------------------------------------------------------------------------------------------------------------------------------------------------------------------------------------------------------------------------------------------------------------------------------------------------------------------------------------------------------------------------------------------------------------------------------------------------------------------------------------------------------------------------------------------------------------------------------------------------------------------------------------------------------------------------------------------------------------------------------------------------------------------------------------------------------------------------------------------------------------------------------------------------------------------------------------------------------------------------------------------------------------------------------------------------------------------------------------------------------------------------------------------------------------------------------------------------------------------------------------------------------------------------------------------------------------------------------------------------------------------------------------------------------------------------------------------------------------------------------------------------------------------------------------------------------------------------------------------------------------------------------------------------------------------------------------------------------------------------------------------------------------------------------|
| GO:0005506 | iron ion binding                  | F | 6.76E+05 | 3.00E+04 | 3 | 33  | over  | RPRC005729, RPRC013804, RPRC010050 | RPRC003227, RPRC007511, RPRC014860, RPRC003270, RPRC012297, RPRC009967, RPRC004769, RPRC009370, RPRC003886, RPRC012677, RPRC005454, RPRC000592, RPRC009881, RPRC005615, RPRC003942, RPRC004701, RPRC007672, RPRC007034, RPRC012024, RPRC013830, RPRC001745, RPRC013447, RPRC001881, RPRC007077, RPRC007300, RPRC005553, RPRC006400, RPRC014149, RPRC010679, RPRC004244, RPRC000626, RPRC014101, RPRC015287                                                                                                                                                                                                                                                                                                                                                                                                                                                                                                                                                                                                                                                                                                                                                                                                                                                                                                                                                                                                                                                                                                                                                                                                                                                                                                                                                                                                                                                                                                                                                                                                                                                                                                                                                                                                                                                                                                                                     |
| GO:0019752 | carboxylic acid metabolic process | P | 6.76E+05 | 3.24E+04 | 2 | 388 | under | RPRC000370, RPRC012101             | RPRC015027, RPRC000509, RPRC001671, RPRC013946, RPRC012423, RPRC007493, RPRC006550, RPRC000391, RPRC002708, RPRC000167, RPRC003658, RPRC001276, RPRC000633, RPRC003403, RPRC001021, RPRC015405, RPRC001985, RPRC014789, RPRC009934, RPRC014948, RPRC001666, RPRC003634, RPRC010184, RPRC015063, RPRC002756, RPRC007783, RPRC004819, RPRC011281, RPRC014924, RPRC001790, RPRC013492, RPRC007559, RPRC003853, RPRC014180, RPRC006286, RPRC012318, RPRC005491, RPRC005070, RPRC012932, RPRC010391, RPRC011204, RPRC008242, RPRC000706, RPRC007535, RPRC004772, RPRC008485, RPRC003924, RPRC012856, RPRC009810, RPRC013965, RPRC013487, RPRC001371, RPRC007045, RPRC012271, RPRC011985, RPRC014027, RPRC007511, RPRC000830, RPRC011093, RPRC006747, RPRC004365, RPRC006481, RPRC001708, RPRC004619, RPRC000333, RPRC004767, RPRC000269, RPRC002851, RPRC000321, RPRC004755, RPRC009634, RPRC006659, RPRC013853, RPRC008054, RPRC011471, RPRC014329, RPRC007654, RPRC002213, RPRC007813, RPRC005852, RPRC007961, RPRC000961, RPRC003819, RPRC017364, RPRC002846, RPRC001330, RPRC001266, RPRC004898, RPRC009777, RPRC009522, RPRC006547, RPRC002420, RPRC010918, RPRC011932, RPRC003317, RPRC012556, RPRC011040, RPRC014110, RPRC003294, RPRC004312, RPRC013824, RPRC004460, RPRC005262, RPRC006216, RPRC001166, RPRC008734, RPRC003270, RPRC009972, RPRC006997, RPRC012297, RPRC004319, RPRC013417, RPRC007939, RPRC015196, RPRC000678, RPRC004709, RPRC004857, RPRC004538, RPRC007035, RPRC007915, RPRC001042, RPRC011497, RPRC011963, RPRC005878, RPRC003507, RPRC007732, RPRC003241, RPRC011951, RPRC005281, RPRC000720, RPRC004881, RPRC014626, RPRC003862, RPRC005830, RPRC013175, RPRC003384, RPRC015450, RPRC007958, RPRC004569, RPRC000863, RPRC014526, RPRC011858, RPRC000123, RPRC015309, RPRC007468, RPRC000366, RPRC012853, RPRC013655, RPRC007934, RPRC007213, RPRC013484, RPRC009424, RPRC010713, RPRC015369, RPRC011822, RPRC006023, RPRC014669, RPRC010383, RPRC000751, RPRC008784, RPRC010466, RPRC003650, RPRC006561, RPRC001056, RPRC013543, RPRC012677, RPRC011161, RPRC006390, RPRC000758, RPRC000810, RPRC002282, RPRC008684, RPRC012027, RPRC008270, RPRC005454, RPRC000734, RPRC005920, RPRC009774, RPRC015074, RPRC009709, RPRC006225, RPRC000805, RPRC002914, RPRC011132, RPRC014191, RPRC014923, RPRC002838, RPRC007546 |

RPRC007705, RPRC014676, RPRC001246, RPRC013089, RPRC012146, RPRC009184, RPRC008241, RPRC005266, RPRC005880, RPRC002909, RPRC011848, RPRC007936, RPRC008472, RPRC010727, RPRC001370, RPRC012270, RPRC001317, RPRC010142, RPRC011103, RPRC006894, RPRC009816, RPRC014321, RPRC002957, RPRC004447, RPRC000741, RPRC011736, RPRC012986, RPRC000001, RPRC011470, RPRC012572, RPRC007812, RPRC005059, RPRC008762, RPRC008698, RPRC007907, RPRC013935, RPRC002762, RPRC015259, RPRC013036, RPRC007884, RPRC006941, RPRC006156, RPRC011234, RPRC004961, RPRC004483, RPRC003878, RPRC001496, RPRC004566, RPRC012077, RPRC006056, RPRC005261, RPRC012957, RPRC002438, RPRC000700, RPRC009433, RPRC006670, RPRC012065, RPRC008881, RPRC000617, RPRC010965, RPRC000605, RPRC009250, RPRC000689, RPRC007441, RPRC004466, RPRC001714, RPRC008402, RPRC009588, RPRC012200, RPRC001691, RPRC013393, RPRC007672, RPRC009014, RPRC003276, RPRC014028, RPRC011265, RPRC006919, RPRC011519, RPRC014790, RPRC007034, RPRC009002, RPRC000589, RPRC009404, RPRC006429, RPRC003666, RPRC012609, RPRC006015, RPRC015095, RPRC011336, RPRC005315, RPRC002704, RPRC007572, RPRC002067, RPRC008628, RPRC013126, RPRC004278, RPRC006310, RPRC000826, RPRC014478, RPRC015071, RPRC005280, RPRC014223, RPRC007336, RPRC013364, RPRC002286, RPRC005617, RPRC004644, RPRC006548, RPRC010103, RPRC004230, RPRC001255, RPRC006377, RPRC013423, RPRC000862, RPRC000798, RPRC002038, RPRC003932, RPRC004556, RPRC009021, RPRC003283, RPRC001940, RPRC013009, RPRC010394, RPRC015125, RPRC015273, RPRC007591, RPRC005641, RPRC005800, RPRC005884, RPRC003927, RPRC008233, RPRC004858, RPRC005310, RPRC012369, RPRC005553, RPRC001055, RPRC003744, RPRC013785, RPRC014739, RPRC015332, RPRC013371, RPRC014473, RPRC013318, RPRC000757, RPRC013466, RPRC001202, RPRC001286, RPRC012588, RPRC002281, RPRC010991, RPRC008535, RPRC014715, RPRC012174, RPRC004344, RPRC001740, RPRC000881, RPRC013601, RPRC014787, RPRC015232, RPRC014946, RPRC007402, RPRC001102, RPRC003727, RPRC004097, RPRC004817, RPRC006053, RPRC000467, RPRC015292, RPRC009939, RPRC000698, RPRC013987, RPRC009927, RPRC000864, RPRC011764, RPRC008081, RPRC001488, RPRC009342, RPRC008483, RPRC011604, RPRC005003, RPRC013497, RPRC013140, RPRC005826, RPRC014101, RPRC006207, RPRC000840, RPRC002885, RPRC012364, RPRC006491, RPRC000184-PB, RPRC000184, RPRC008406, RPRC000923, RPRC013461, RPRC004924, RPRC006160, RPRC000574, RPRC004605, RPRC012678, RPRC010212, RPRC000167, RPRC007014, RPRC001021, RPRC014610, RPRC014789, RPRC001666, RPRC015063, RPRC002513, RPRC014924, RPRC001790, RPRC004860, RPRC003853, RPRC006286, RPRC012318, RPRC005491, RPRC003777, RPRC012932, RPRC010391, RPRC007535, RPRC004772, RPRC008485, RPRC012856, RPRC001637, RPRC002018,

GO:0006468

protein phosphorylation

P

6.76E+05 3.33E+04

0

204

under

RPRC013487, RPRC005633, RPRC000333, RPRC004767,  
RPRC013865, RPRC002851, RPRC000321, RPRC009634,  
RPRC006659, RPRC008054, RPRC011471, RPRC008213,  
RPRC007813, RPRC005852, RPRC000961, RPRC001330,  
RPRC013013, RPRC004886, RPRC011932, RPRC012556,  
RPRC003051, RPRC011920, RPRC001792, RPRC008734,  
RPRC005019, RPRC012934, RPRC004319, RPRC015112,  
RPRC007939, RPRC001692, RPRC008168, RPRC004857,  
RPRC015100, RPRC012994, RPRC001149, RPRC007035,  
RPRC007915, RPRC007732, RPRC000839, RPRC009931,  
RPRC004881, RPRC003862, RPRC013175, RPRC011946,  
RPRC015450, RPRC006442, RPRC000863, RPRC014526,  
RPRC008334, RPRC013655, RPRC011910, RPRC013400,  
RPRC010713, RPRC011822, RPRC011917, RPRC001610,  
RPRC007432, RPRC010785, RPRC006668, RPRC008636,  
RPRC008784, RPRC006390, RPRC015014, RPRC002282,  
RPRC001741, RPRC012099, RPRC013105, RPRC012489,  
RPRC002914, RPRC014191, RPRC014923, RPRC009431,  
RPRC000699, RPRC007546, RPRC014676, RPRC009184,  
RPRC008241, RPRC005266, RPRC008336, RPRC005349,  
RPRC006894, RPRC011919, RPRC014321, RPRC002957,  
RPRC004754, RPRC007812, RPRC012412, RPRC011796,  
RPRC013036, RPRC006941, RPRC000736, RPRC004483,  
RPRC005095, RPRC012077, RPRC012957, RPRC002438,  
RPRC001555, RPRC007441, RPRC001141, RPRC012200,  
RPRC007991, RPRC009026, RPRC006251, RPRC003276,  
RPRC011265, RPRC009002, RPRC006429, RPRC006577,  
RPRC001750, RPRC013126, RPRC006860, RPRC002309,  
RPRC013778, RPRC014223, RPRC007336, RPRC000814,  
RPRC010180, RPRC012179, RPRC007631, RPRC006548,  
RPRC004230, RPRC006377, RPRC000862, RPRC000798,  
RPRC002038, RPRC013495, RPRC003442, RPRC001940,  
RPRC010394, RPRC007591, RPRC005800, RPRC008233,  
RPRC001693, RPRC011502, RPRC010636, RPRC001226,  
RPRC007981, RPRC003744, RPRC015332, RPRC002559,  
RPRC010134, RPRC001286, RPRC004208, RPRC008854,  
RPRC007119, RPRC005317, RPRC001031, RPRC012588,  
RPRC010991, RPRC014715, RPRC015085, RPRC004344,  
RPRC001740, RPRC000881, RPRC013601, RPRC014787,  
RPRC001102, RPRC003727, RPRC004097, RPRC015156,  
RPRC006467, RPRC011545, RPRC009939, RPRC000864,  
RPRC007788, RPRC006124, RPRC009342, RPRC013497,  
RPRC004717, RPRC013140, RPRC011911, RPRC006207,  
RPRC004705, RPRC001221, RPRC003273, RPRC000184-PB,  
RPRC000184, RPRC011516, RPRC008406, RPRC006669  
RPRC014058, RPRC004312, RPRC008256, RPRC013641,  
RPRC007920, RPRC014200, RPRC013650, RPRC002774,  
RPRC015311, RPRC011731, RPRC010044, RPRC009259,  
RPRC000704, RPRC005412

---

|            |                     |   |          |          |   |    |      |                        |
|------------|---------------------|---|----------|----------|---|----|------|------------------------|
| GO:0044822 | poly(A) RNA binding | F | 6.76E+05 | 3.59E+04 | 2 | 14 | over | RPRC012247, RPRC001811 |
|------------|---------------------|---|----------|----------|---|----|------|------------------------|

---

|            |                                    |   |          |          |   |   |      |            |            |
|------------|------------------------------------|---|----------|----------|---|---|------|------------|------------|
| GO:0043388 | positive regulation of DNA binding | P | 6.76E+05 | 3.75E+04 | 1 | 1 | over | RPRC001811 | RPRC006379 |
|------------|------------------------------------|---|----------|----------|---|---|------|------------|------------|

|            |                                                                          |   |          |          |   |   |      |            |            |
|------------|--------------------------------------------------------------------------|---|----------|----------|---|---|------|------------|------------|
| GO:0033555 | multicellular<br>organismal response<br>to stress                        | P | 6.76E+05 | 3.75E+04 | 1 | 1 | over | RPRC007515 | RPRC007025 |
| GO:0004550 | nucleoside<br>diphosphate kinase<br>activity                             | F | 6.76E+05 | 3.75E+04 | 1 | 1 | over | RPRC001811 | RPRC009259 |
| GO:0004478 | methionine<br>adenosyltransferase<br>activity                            | F | 6.76E+05 | 3.75E+04 | 1 | 1 | over | RPRC012101 | RPRC004605 |
| GO:0000022 | mitotic spindle<br>elongation                                            | P | 6.76E+05 | 3.75E+04 | 1 | 1 | over | RPRC015127 | RPRC004459 |
| GO:0006556 | S-adenosylmethionine<br>biosynthetic process                             | P | 6.76E+05 | 3.75E+04 | 1 | 1 | over | RPRC012101 | RPRC004605 |
| GO:0002181 | cytoplasmic<br>translation                                               | P | 6.76E+05 | 3.75E+04 | 1 | 1 | over | RPRC010146 | RPRC007370 |
| GO:0002027 | regulation of heart<br>rate                                              | P | 6.76E+05 | 3.75E+04 | 1 | 1 | over | RPRC007515 | RPRC003117 |
| GO:0002020 | protease binding                                                         | F | 6.76E+05 | 3.75E+04 | 1 | 1 | over | RPRC012247 | RPRC009942 |
| GO:0005853 | eukaryotic translation<br>elongation factor 1<br>complex                 | C | 6.76E+05 | 3.75E+04 | 1 | 1 | over | RPRC007684 | RPRC009039 |
| GO:0000980 | RNA polymerase II<br>distal enhancer<br>sequence-specific DNA<br>binding | F | 6.76E+05 | 3.75E+04 | 1 | 1 | over | RPRC008809 | RPRC005115 |
| GO:0030307 | positive regulation of<br>cell growth                                    | P | 6.76E+05 | 3.75E+04 | 1 | 1 | over | RPRC008809 | RPRC005417 |
| GO:0000979 | RNA polymerase II<br>core promoter<br>sequence-specific DNA<br>binding   | F | 6.76E+05 | 3.75E+04 | 1 | 1 | over | RPRC008809 | RPRC003362 |
| GO:0006228 | UTP biosynthetic<br>process                                              | P | 6.76E+05 | 3.75E+04 | 1 | 1 | over | RPRC001811 | RPRC009259 |

|            |                                        |   |          |          |   |     |       |                                                            |                                                                                                                                                                                                                                                                                                                                                                                                                                                                                                                                                                                                                                                                                                                                                                                                                                                                                                                                                                                                                                                                                                                                                                                                                                                                                                                                                 |
|------------|----------------------------------------|---|----------|----------|---|-----|-------|------------------------------------------------------------|-------------------------------------------------------------------------------------------------------------------------------------------------------------------------------------------------------------------------------------------------------------------------------------------------------------------------------------------------------------------------------------------------------------------------------------------------------------------------------------------------------------------------------------------------------------------------------------------------------------------------------------------------------------------------------------------------------------------------------------------------------------------------------------------------------------------------------------------------------------------------------------------------------------------------------------------------------------------------------------------------------------------------------------------------------------------------------------------------------------------------------------------------------------------------------------------------------------------------------------------------------------------------------------------------------------------------------------------------|
| GO:0032465 | regulation of cytokinesis              | P | 6.76E+05 | 3.75E+04 | 1 | 1   | over  | RPRC007515                                                 | RPRC010698                                                                                                                                                                                                                                                                                                                                                                                                                                                                                                                                                                                                                                                                                                                                                                                                                                                                                                                                                                                                                                                                                                                                                                                                                                                                                                                                      |
| GO:0022625 | cytosolic large ribosomal subunit      | C | 6.76E+05 | 3.75E+04 | 1 | 1   | over  | RPRC015127                                                 | RPRC014620                                                                                                                                                                                                                                                                                                                                                                                                                                                                                                                                                                                                                                                                                                                                                                                                                                                                                                                                                                                                                                                                                                                                                                                                                                                                                                                                      |
| GO:0006183 | GTP biosynthetic process               | P | 6.76E+05 | 3.75E+04 | 1 | 1   | over  | RPRC001811                                                 | RPRC009259                                                                                                                                                                                                                                                                                                                                                                                                                                                                                                                                                                                                                                                                                                                                                                                                                                                                                                                                                                                                                                                                                                                                                                                                                                                                                                                                      |
| GO:0006165 | nucleoside diphosphate phosphorylation | P | 6.76E+05 | 3.75E+04 | 1 | 1   | over  | RPRC001811                                                 | RPRC009259                                                                                                                                                                                                                                                                                                                                                                                                                                                                                                                                                                                                                                                                                                                                                                                                                                                                                                                                                                                                                                                                                                                                                                                                                                                                                                                                      |
| GO:0008308 | voltage-gated anion channel activity   | F | 6.76E+05 | 3.75E+04 | 1 | 1   | over  | RPRC008679                                                 | RPRC002738                                                                                                                                                                                                                                                                                                                                                                                                                                                                                                                                                                                                                                                                                                                                                                                                                                                                                                                                                                                                                                                                                                                                                                                                                                                                                                                                      |
| GO:0030018 | Z disc                                 | C | 6.76E+05 | 3.75E+04 | 1 | 1   | over  | RPRC007515                                                 | RPRC005070                                                                                                                                                                                                                                                                                                                                                                                                                                                                                                                                                                                                                                                                                                                                                                                                                                                                                                                                                                                                                                                                                                                                                                                                                                                                                                                                      |
| GO:0044070 | regulation of anion transport          | P | 6.76E+05 | 3.75E+04 | 1 | 1   | over  | RPRC008679                                                 | RPRC002738                                                                                                                                                                                                                                                                                                                                                                                                                                                                                                                                                                                                                                                                                                                                                                                                                                                                                                                                                                                                                                                                                                                                                                                                                                                                                                                                      |
| GO:0090304 | nucleic acid metabolic process         | P | 6.91E+05 | 3.85E+04 | 5 | 600 | under | RPRC001811, RPRC007515, RPRC000303, RPRC001993, RPRC002923 | RPRC002530, RPRC005809, RPRC011257, RPRC002052, RPRC004677, RPRC002868, RPRC006645, RPRC001204, RPRC003097, RPRC001352, RPRC012104, RPRC001595, RPRC002708, RPRC001181, RPRC015417, RPRC003870, RPRC004092, RPRC009544, RPRC013615, RPRC000633, RPRC011381, RPRC009946, RPRC015246, RPRC014239, RPRC012578, RPRC005200, RPRC007818, RPRC013846, RPRC003475, RPRC014948, RPRC015382, RPRC000723, RPRC011559, RPRC001252, RPRC014120, RPRC002756, RPRC009444, RPRC011695, RPRC000954, RPRC012076, RPRC006362, RPRC001578, RPRC011535, RPRC010976, RPRC005757, RPRC010498, RPRC012318, RPRC009929, RPRC007388, RPRC009208, RPRC000445, RPRC015365, RPRC004772, RPRC012040, RPRC005005, RPRC002242, RPRC007842, RPRC002485, RPRC011276, RPRC008887, RPRC013965, RPRC001701, RPRC003594, RPRC013551, RPRC009575, RPRC010876, RPRC003996, RPRC001318, RPRC014027, RPRC010462, RPRC004377, RPRC005391, RPRC001625, RPRC014334, RPRC001052, RPRC008249, RPRC005645, RPRC012111, RPRC001295, RPRC006895, RPRC004365, RPRC000588, RPRC000026, RPRC002078, RPRC004767, RPRC003824, RPRC014967, RPRC002066, RPRC010776, RPRC013030, RPRC003748, RPRC012892, RPRC004436, RPRC000659, RPRC007347, RPRC006488, RPRC001768, RPRC002934, RPRC006647, RPRC008042, RPRC005947, RPRC011554, RPRC015419, RPRC001915, RPRC006783, RPRC007801, RPRC003819, RPRC010274, |

RPRC003712, RPRC000737, RPRC002846, RPRC005100,  
RPRC004962, RPRC002527, RPRC015384, RPRC009522,  
RPRC010250, RPRC007076, RPRC008970, RPRC014058,  
RPRC000133, RPRC003772, RPRC003051, RPRC001899,  
RPRC004312, RPRC014046, RPRC011283, RPRC006459,  
RPRC001230, RPRC012703, RPRC013232, RPRC013960,  
RPRC008256, RPRC010818, RPRC006033, RPRC006913,  
RPRC008085, RPRC006997, RPRC002817, RPRC003110,  
RPRC005155, RPRC000583-PB, RPRC000583, RPRC006116,  
RPRC009960, RPRC002073, RPRC000264, RPRC004709,  
RPRC010878, RPRC007832, RPRC004284, RPRC002475,  
RPRC011987, RPRC009163, RPRC001680, RPRC002941,  
RPRC002220, RPRC010293, RPRC012515, RPRC006801,  
RPRC010281, RPRC008789, RPRC007266, RPRC015255,  
RPRC009234, RPRC008948, RPRC001910, RPRC002789,  
RPRC011792, RPRC005559, RPRC002227, RPRC009636,  
RPRC011887, RPRC014077, RPRC015391, RPRC009317,  
RPRC003791, RPRC001834, RPRC003017, RPRC006649,  
RPRC003886, RPRC014850, RPRC007899, RPRC008192,  
RPRC001515, RPRC006478, RPRC011863, RPRC013039,  
RPRC012392, RPRC012403, RPRC001587, RPRC015314,  
RPRC000951, RPRC009536, RPRC005618, RPRC005038,  
RPRC004402, RPRC015450, RPRC014602, RPRC010188,  
RPRC007290, RPRC004474, RPRC006844, RPRC009755,  
RPRC015055, RPRC014112, RPRC001487, RPRC005264,  
RPRC002505, RPRC001794, RPRC001073, RPRC015309,  
RPRC007468, RPRC014514, RPRC014662, RPRC010885,  
RPRC005973, RPRC002577, RPRC007456, RPRC006597,  
RPRC006183, RPRC007137, RPRC008087, RPRC010649,  
RPRC009560, RPRC005790, RPRC008489, RPRC012044,  
RPRC000437, RPRC012924, RPRC015114, RPRC008075,  
RPRC009962, RPRC006987, RPRC001132, RPRC004202,  
RPRC008636, RPRC015186, RPRC005395, RPRC010625,  
RPRC006561, RPRC013543, RPRC011161, RPRC008772,  
RPRC007344, RPRC004528, RPRC007439, RPRC005785,  
RPRC007025, RPRC004262, RPRC015014, RPRC007173,  
RPRC000230, RPRC001180, RPRC001127, RPRC001996,  
RPRC012027, RPRC005932, RPRC012907, RPRC007256,  
RPRC009945, RPRC017361, RPRC012429, RPRC012641,  
RPRC003072, RPRC011061, RPRC005920, RPRC005856,  
RPRC007244, RPRC002110, RPRC010820, RPRC013010,  
RPRC004883, RPRC012003, RPRC001919, RPRC009698,  
RPRC000692, RPRC007327, RPRC001812, RPRC014521,  
RPRC005673, RPRC012796, RPRC010987, RPRC005188,  
RPRC001429, RPRC005513, RPRC012700, RPRC013502,  
RPRC001163, RPRC013650, RPRC005176, RPRC014688,  
RPRC003374, RPRC003681, RPRC000137, RPRC007546,  
RPRC001967, RPRC011044, RPRC010899, RPRC013089,  
RPRC003362, RPRC015057, RPRC014114, RPRC014209,  
RPRC004559, RPRC000853, RPRC015459, RPRC009438,  
RPRC008738, RPRC009331, RPRC007458, RPRC007670,  
RPRC010727, RPRC001943, RPRC010875, RPRC008631,  
RPRC000936, RPRC012843, RPRC011900, RPRC001317,  
RPRC014174, RPRC005485, RPRC011665, RPRC004778,  
RPRC004057, RPRC007032, RPRC014162, RPRC000587,  
RPRC006332, RPRC000025, RPRC004671, RPRC012596,

RPRC014416, RPRC001134, RPRC003823, RPRC004045,  
RPRC011027, RPRC015093, RPRC014150, RPRC000900,  
RPRC006499, RPRC001122, RPRC000320, RPRC004754,  
RPRC003811, RPRC001058, RPRC001938, RPRC007824,  
RPRC013788, RPRC008212, RPRC007346, RPRC002774,  
RPRC000824, RPRC001205, RPRC013112, RPRC008698,  
RPRC006953, RPRC007334, RPRC002762, RPRC015259,  
RPRC003002, RPRC004093, RPRC010273, RPRC009788,  
RPRC014293, RPRC007258, RPRC002750, RPRC007565,  
RPRC002845, RPRC004081, RPRC013172, RPRC001519,  
RPRC009298, RPRC012631, RPRC009521, RPRC005023,  
RPRC000239, RPRC004164, RPRC009923, RPRC007382,  
RPRC004630, RPRC013000, RPRC013664, RPRC001400,  
RPRC010332, RPRC001336, RPRC010989, RPRC005261,  
RPRC007370, RPRC011441, RPRC006670, RPRC011672,  
RPRC002107, RPRC000594, RPRC002414, RPRC003216,  
RPRC006848, RPRC008243, RPRC011448, RPRC002084,  
RPRC013416, RPRC005006, RPRC005154, RPRC001236,  
RPRC004868, RPRC005882, RPRC011914, RPRC012136,  
RPRC009026, RPRC014104, RPRC002486, RPRC007938,  
RPRC008019, RPRC006358, RPRC010782, RPRC006092,  
RPRC006972, RPRC008728, RPRC014028, RPRC002781,  
RPRC004601, RPRC010558, RPRC000767, RPRC009416,  
RPRC011731, RPRC011667, RPRC004844, RPRC003985,  
RPRC005805, RPRC007277, RPRC001614, RPRC009404,  
RPRC015095, RPRC011909, RPRC015106, RPRC002693,  
RPRC002704, RPRC012586, RPRC010841, RPRC011791,  
RPRC012172, RPRC006151, RPRC008628, RPRC005239,  
RPRC000731, RPRC006405, RPRC010617, RPRC003790,  
RPRC003801, RPRC005125, RPRC005280, RPRC001598,  
RPRC008286, RPRC013364, RPRC007579, RPRC013459,  
RPRC011714, RPRC012964, RPRC009706, RPRC002031,  
RPRC008369, RPRC010900, RPRC001331, RPRC008983,  
RPRC013849, RPRC008357, RPRC012633, RPRC012007,  
RPRC010410, RPRC009766, RPRC009045, RPRC005996,  
RPRC003318, RPRC011455, RPRC000282, RPRC007691,  
RPRC010896, RPRC004875, RPRC011857, RPRC008747,  
RPRC015149, RPRC002895, RPRC009742, RPRC003442,  
RPRC005346, RPRC011526, RPRC006660, RPRC012776,  
RPRC011833, RPRC004946, RPRC014171, RPRC009188,  
RPRC008393, RPRC002086, RPRC003111, RPRC002404,  
RPRC011916, RPRC014254, RPRC013311, RPRC001852,  
RPRC001788, RPRC006731, RPRC004190, RPRC011745,  
RPRC004922, RPRC007833, RPRC006094, RPRC007981,  
RPRC012581, RPRC002062, RPRC009259, RPRC006814,  
RPRC000496, RPRC013785, RPRC015332, RPRC002559,  
RPRC015268, RPRC014473, RPRC007586, RPRC008611,  
RPRC009076, RPRC014154, RPRC007267, RPRC009235,  
RPRC001031, RPRC006631, RPRC012895, RPRC012906,  
RPRC009064, RPRC000881, RPRC007000, RPRC010289,  
RPRC007402, RPRC014373, RPRC008288, RPRC001186,  
RPRC003875, RPRC005115, RPRC003461, RPRC010500,  
RPRC015156, RPRC002606, RPRC004499, RPRC014456,  
RPRC010679, RPRC004870, RPRC007940, RPRC008021,  
RPRC005926, RPRC000626, RPRC009271, RPRC012476,  
RPRC003703, RPRC004953, RPRC000455, RPRC012157,



|            |                                        |   |          |          |   |    |      |                                                |                                                                                                                                                                                                                                                                                                                                                                                                                                                                                                                                                                                                                                                                                                                                                                                                                                                            |
|------------|----------------------------------------|---|----------|----------|---|----|------|------------------------------------------------|------------------------------------------------------------------------------------------------------------------------------------------------------------------------------------------------------------------------------------------------------------------------------------------------------------------------------------------------------------------------------------------------------------------------------------------------------------------------------------------------------------------------------------------------------------------------------------------------------------------------------------------------------------------------------------------------------------------------------------------------------------------------------------------------------------------------------------------------------------|
|            |                                        |   |          |          |   |    |      |                                                | RPRC004327, RPRC014273, RPRC013330, RPRC006379, RPRC008411, RPRC001871, RPRC010029, RPRC000443, RPRC004156, RPRC008081, RPRC001552, RPRC013975, RPRC001647, RPRC002081, RPRC005003, RPRC008737, RPRC014037, RPRC000674, RPRC005412, RPRC000840, RPRC002164, RPRC006609, RPRC008873, RPRC008152, RPRC000609, RPRC006491, RPRC005484, RPRC013325, RPRC006502, RPRC002968, RPRC011971, RPRC005738, RPRC004936, RPRC006172, RPRC007274, RPRC011345, RPRC000752, RPRC015422, RPRC013620, RPRC004192, RPRC004351, RPRC006107, RPRC014392, RPRC009780                                                                                                                                                                                                                                                                                                             |
| GO:0070469 | respiratory chain                      | C | 8.15E+04 | 4.72E+04 | 3 | 40 | over | RPRC012468, RPRC013804, RPRC014245             | RPRC007811, RPRC005212, RPRC013687, RPRC005845, RPRC005338, RPRC005409, RPRC014986, RPRC012922, RPRC011839, RPRC014579, RPRC007118, RPRC013180, RPRC012256, RPRC010901, RPRC000780, RPRC010093, RPRC005506, RPRC004840, RPRC007427, RPRC004174, RPRC006787, RPRC006213, RPRC000054, RPRC012755, RPRC002614, RPRC004701, RPRC004785, RPRC007507, RPRC003690, RPRC003685, RPRC004687, RPRC013690, RPRC003118, RPRC007669, RPRC008997, RPRC005092, RPRC003301, RPRC010094, RPRC006976, RPRC002637                                                                                                                                                                                                                                                                                                                                                             |
| GO:0015992 | proton transport                       | P | 8.25E+05 | 4.89E+04 | 4 | 69 | over | RPRC012468, RPRC006543, RPRC011931, RPRC014245 | RPRC002932, RPRC007811, RPRC004960, RPRC013687, RPRC009520, RPRC005845, RPRC013834, RPRC003694, RPRC010550, RPRC007228, RPRC005881, RPRC013237, RPRC002473, RPRC005338, RPRC003410, RPRC005409, RPRC006718, RPRC007956, RPRC014986, RPRC012922, RPRC011839, RPRC014579, RPRC007118, RPRC015179, RPRC012256, RPRC010901, RPRC012073, RPRC015291, RPRC000780, RPRC010093, RPRC001392, RPRC005506, RPRC004840, RPRC009396, RPRC007427, RPRC002938, RPRC001199, RPRC006213, RPRC012879, RPRC001151, RPRC008312, RPRC012755, RPRC004849, RPRC002614, RPRC008833, RPRC005917, RPRC000044, RPRC008498, RPRC005989, RPRC007341, RPRC007507, RPRC003690, RPRC005494, RPRC003685, RPRC007686, RPRC008169, RPRC013690, RPRC003118, RPRC007426, RPRC007669, RPRC001198, RPRC003568, RPRC008997, RPRC005092, RPRC003301, RPRC009992, RPRC010094, RPRC003113, RPRC002637 |
| GO:0006446 | regulation of translational initiation | P | 8.25E+05 | 5.00E+04 | 3 | 41 | over | RPRC010378, RPRC013802, RPRC002700             | RPRC009699, RPRC006840, RPRC009587, RPRC002208, RPRC006459, RPRC001018, RPRC006116, RPRC003914, RPRC013955, RPRC013696, RPRC000566, RPRC014786, RPRC006478, RPRC001101, RPRC012870, RPRC006844, RPRC004935, RPRC006903, RPRC004362, RPRC011953, RPRC010218, RPRC003864, RPRC010290, RPRC006499, RPRC013852, RPRC001448, RPRC007334, RPRC015147, RPRC010634, RPRC007926, RPRC007607, RPRC008557, RPRC003801, RPRC004922, RPRC004846, RPRC015292, RPRC007462, RPRC003851, RPRC007923, RPRC014905, RPRC002383                                                                                                                                                                                                                                                                                                                                                 |
| GO:0003743 | translation initiation factor activity | F | 8.25E+05 | 5.00E+04 | 3 | 41 | over | RPRC010378, RPRC013802, RPRC002700             | RPRC009699, RPRC006840, RPRC009587, RPRC002208, RPRC006459, RPRC001018, RPRC006116, RPRC003914, RPRC013955, RPRC013696, RPRC000566, RPRC014786, RPRC006478, RPRC001101, RPRC012870, RPRC006844, RPRC004935, RPRC006903, RPRC004362, RPRC011953, RPRC010218, RPRC003864, RPRC010290, RPRC006499,                                                                                                                                                                                                                                                                                                                                                                                                                                                                                                                                                            |

RPRC013852, RPRC001448, RPRC007334, RPRC015147,  
RPRC010634, RPRC007926, RPRC007607, RPRC008557,  
RPRC003801, RPRC004922, RPRC004846, RPRC015292,  
RPRC007462, RPRC003851, RPRC007923, RPRC014905,  
RPRC002383

**Table S2-** Comparison of GO annotation terms for enriched transcripts between libraries. (\*) P: Biological process, F: Molecular function and C: Cellular component. (\*\*) Fields with 0 mean that this function is underrepresented in differentially expressed genes dataset.

| GO ID      | GO category* | GO term                                                                                 | Genes in each sample** |        |      |
|------------|--------------|-----------------------------------------------------------------------------------------|------------------------|--------|------|
|            |              |                                                                                         | Larvae                 | Female | Male |
| GO:0000028 | P            | ribosomal small subunit assembly                                                        | 1                      | 1      | 1    |
| GO:0000788 | C            | nuclear nucleosome                                                                      | 1                      | 1      | 1    |
| GO:0001569 | P            | patterning of blood vessels                                                             | 1                      | 1      | 1    |
| GO:0001837 | P            | epithelial to mesenchymal transition                                                    | 1                      | 1      | 1    |
| GO:0003735 | F            | structural constituent of ribosome                                                      | 63                     | 62     | 34   |
| GO:0003746 | F            | translation elongation factor activity                                                  | 4                      | 4      | 4    |
| GO:0003924 | F            | GTPase activity                                                                         | 10                     | 8      | 7    |
| GO:0003958 | F            | NADPH-hemoprotein reductase activity                                                    | 1                      | 1      | 1    |
| GO:0004672 | F            | protein kinase activity                                                                 | 2                      | 1      | 0    |
| GO:0004838 | F            | L-tyrosine:2-oxoglutarate aminotransferase activity                                     | 1                      | 1      | 1    |
| GO:0005200 | F            | structural constituent of cytoskeleton                                                  | 6                      | 6      | 5    |
| GO:0005513 | P            | detection of calcium ion                                                                | 1                      | 1      | 1    |
| GO:0005525 | F            | GTP binding                                                                             | 12                     | 10     | 9    |
| GO:0005549 | F            | odorant binding                                                                         | 4                      | 3      | 5    |
| GO:0005874 | C            | microtubule                                                                             | 6                      | 6      | 5    |
| GO:0006336 | P            | DNA replication-independent nucleosome assembly                                         | 1                      | 1      | 1    |
| GO:0006407 | P            | rRNA export from nucleus                                                                | 1                      | 1      | 1    |
| GO:0006448 | P            | regulation of translational elongation                                                  | 4                      | 4      | 4    |
| GO:0006468 | P            | protein phosphorylation                                                                 | 1                      | 0      | 0    |
| GO:0007595 | P            | lactation                                                                               | 1                      | 1      | 1    |
| GO:0009785 | P            | blue light signaling pathway                                                            | 1                      | 1      | 1    |
| GO:0009882 | F            | blue light photoreceptor activity                                                       | 1                      | 1      | 1    |
| GO:0010880 | P            | regulation of release of sequestered calcium ion into cytosol by sarcoplasmic reticulum | 1                      | 1      | 1    |
| GO:0010992 | P            | ubiquitin homeostasis                                                                   | 1                      | 1      | 1    |
| GO:0014883 | P            | transition between fast and slow fiber                                                  | 1                      | 1      | 1    |
| GO:0019843 | F            | rRNA binding                                                                            | 4                      | 4      | 2    |
| GO:0019904 | F            | protein domain specific binding                                                         | 2                      | 2      | 2    |
| GO:0021762 | P            | substantia nigra development                                                            | 1                      | 1      | 1    |
| GO:0022625 | C            | cytosolic large ribosomal subunit                                                       | 2                      | 2      | 1    |
| GO:0022627 | C            | cytosolic small ribosomal subunit                                                       | 4                      | 4      | 4    |
| GO:0031432 | F            | titin binding                                                                           | 1                      | 1      | 1    |

| GO ID      | GO category* | GO term                                                                     | Genes in each sample** |        |      |
|------------|--------------|-----------------------------------------------------------------------------|------------------------|--------|------|
|            |              |                                                                             | Larvae                 | Female | Male |
| GO:0031492 | F            | nucleosomal DNA binding                                                     | 1                      | 1      | 1    |
| GO:0031996 | F            | thioesterase binding                                                        | 1                      | 1      | 1    |
| GO:0031997 | F            | N-terminal myristoylation domain binding                                    | 1                      | 1      | 1    |
| GO:0032516 | P            | positive regulation of phosphoprotein phosphatase activity                  | 1                      | 1      | 1    |
| GO:0032587 | C            | ruffle membrane                                                             | 1                      | 1      | 1    |
| GO:0033173 | P            | calcineurin-NFAT signaling cascade                                          | 1                      | 1      | 1    |
| GO:0033192 | F            | calmodulin-dependent protein phosphatase activity                           | 1                      | 1      | 1    |
| GO:0035307 | P            | positive regulation of protein dephosphorylation                            | 1                      | 1      | 1    |
| GO:0035690 | P            | cellular response to drug                                                   | 1                      | 1      | 1    |
| GO:0042383 | C            | sarcolemma                                                                  | 1                      | 1      | 1    |
| GO:0043024 | F            | ribosomal small subunit binding                                             | 1                      | 1      | 1    |
| GO:0043274 | F            | phospholipase binding                                                       | 1                      | 1      | 1    |
| GO:0045955 | P            | negative regulation of calcium ion-dependent exocytosis                     | 1                      | 1      | 1    |
| GO:0046676 | P            | negative regulation of insulin secretion                                    | 1                      | 1      | 1    |
| GO:0048741 | P            | skeletal muscle fiber development                                           | 1                      | 1      | 1    |
| GO:0050679 | P            | positive regulation of epithelial cell proliferation                        | 1                      | 1      | 1    |
| GO:0051258 | P            | protein polymerization                                                      | 5                      | 6      | 4    |
| GO:0051298 | P            | centrosome duplication                                                      | 1                      | 1      | 1    |
| GO:0051343 | P            | positive regulation of cyclic-nucleotide phosphodiesterase activity         | 1                      | 1      | 1    |
| GO:0055117 | P            | regulation of cardiac muscle contraction                                    | 1                      | 1      | 1    |
| GO:0060079 | P            | regulation of excitatory postsynaptic membrane potential                    | 1                      | 1      | 1    |
| GO:0060316 | P            | positive regulation of ryanodine-sensitive calcium-release channel activity | 1                      | 1      | 1    |
| GO:0060487 | P            | lung epithelial cell differentiation                                        | 1                      | 1      | 1    |
| GO:0070062 | C            | extracellular exosome                                                       | 5                      | 5      | 5    |
| GO:0071333 | P            | cellular response to glucose stimulus                                       | 1                      | 1      | 1    |
| GO:0071949 | F            | FAD binding                                                                 | 1                      | 1      | 1    |
| GO:0072542 | F            | protein phosphatase activator activity                                      | 1                      | 1      | 1    |
| GO:0015986 | P            | ATP synthesis coupled proton transport                                      | 5                      | 4      | -    |
| GO:0046933 | F            | proton-transporting ATP synthase activity, rotational mechanism             | 4                      | 3      | -    |
| GO:0008233 | F            | peptidase activity                                                          | 1                      | 1      | -    |
| GO:0000910 | P            | cytokinesis                                                                 | 2                      | 2      | -    |
| GO:0005125 | F            | cytokine activity                                                           | 1                      | 1      | -    |
| GO:0015886 | P            | heme transport                                                              | 1                      | 1      | -    |
| GO:0031932 | C            | TORC2 complex                                                               | 1                      | 1      | -    |
| GO:0031929 | P            | TOR signaling                                                               | 1                      | 1      | -    |

| GO ID      | GO category* | GO term                                                                     | Genes in each sample** |        |      |
|------------|--------------|-----------------------------------------------------------------------------|------------------------|--------|------|
|            |              |                                                                             | Larvae                 | Female | Male |
| GO:0033177 | C            | proton-transporting two-sector ATPase complex, proton-transporting domain   | 2                      | 2      | -    |
| GO:0016209 | F            | antioxidant activity                                                        | 3                      | 3      | -    |
| GO:0005506 | F            | iron ion binding                                                            | -                      | 4      | 3    |
| GO:0006446 | P            | regulation of translational initiation                                      | -                      | 4      | 3    |
| GO:0003743 | F            | translation initiation factor activity                                      | -                      | 4      | 3    |
| GO:0019752 | P            | carboxylic acid metabolic process                                           | 5                      | -      | 2    |
| GO:0008061 | F            | chitin binding                                                              | 3                      | -      | -    |
| GO:0006892 | P            | post-Golgi vesicle-mediated transport                                       | 1                      | -      | -    |
| GO:0000275 | C            | mitochondrial proton-transporting ATP synthase complex, catalytic core F(1) | 1                      | -      | -    |
| GO:0008537 | C            | proteasome activator complex                                                | 1                      | -      | -    |
| GO:1902036 | P            | regulation of hematopoietic stem cell differentiation                       | 1                      | -      | -    |
| GO:0046961 | F            | proton-transporting ATPase activity, rotational mechanism                   | 2                      | -      | -    |
| GO:0006351 | P            | transcription, DNA-templated                                                | 3                      | -      | -    |
| GO:0006030 | P            | chitin metabolic process                                                    | 3                      | -      | -    |
| GO:0045277 | C            | respiratory chain complex IV                                                | -                      | 3      | -    |
| GO:0004129 | F            | cytochrome-c oxidase activity                                               | -                      | 3      | -    |
| GO:0006123 | P            | mitochondrial electron transport, cytochrome c to oxygen                    | -                      | 3      | -    |
| GO:0098800 | C            | inner mitochondrial membrane protein complex                                | -                      | 4      | -    |
| GO:0045261 | C            | proton-transporting ATP synthase complex, catalytic core F(1)               | -                      | 2      | -    |
| GO:0005811 | C            | lipid particle                                                              | -                      | 3      | -    |
| GO:0044255 | P            | cellular lipid metabolic process                                            | -                      | 0      | -    |
| GO:0006355 | P            | regulation of transcription, DNA-templated                                  | -                      | 2      | -    |
| GO:0000162 | P            | tryptophan biosynthetic process                                             | -                      | 2      | -    |
| GO:0006571 | P            | tyrosine biosynthetic process                                               | -                      | 2      | -    |
| GO:0009094 | P            | L-phenylalanine biosynthetic process                                        | -                      | 2      | -    |
| GO:0031966 | C            | mitochondrial membrane                                                      | -                      | -      | 5    |
| GO:0015405 | F            | P-P-bond-hydrolysis-driven transmembrane transporter activity               | -                      | -      | 4    |
| GO:0044822 | F            | poly(A) RNA binding                                                         | -                      | -      | 2    |
| GO:0043388 | P            | positive regulation of DNA binding                                          | -                      | -      | 1    |
| GO:0033555 | P            | multicellular organismal response to stress                                 | -                      | -      | 1    |
| GO:0004550 | F            | nucleoside diphosphate kinase activity                                      | -                      | -      | 1    |
| GO:0004478 | F            | methionine adenosyltransferase activity                                     | -                      | -      | 1    |
| GO:0000022 | P            | mitotic spindle elongation                                                  | -                      | -      | 1    |
| GO:0006556 | P            | S-adenosylmethionine biosynthetic process                                   | -                      | -      | 1    |
| GO:0002181 | P            | cytoplasmic translation                                                     | -                      | -      | 1    |

| GO ID      | GO category* | GO term                                                         | Genes in each sample** |        |      |
|------------|--------------|-----------------------------------------------------------------|------------------------|--------|------|
|            |              |                                                                 | Larvae                 | Female | Male |
| GO:0002027 | P            | regulation of heart rate                                        | -                      | -      | 1    |
| GO:0002020 | F            | protease binding                                                | -                      | -      | 1    |
| GO:0005853 | C            | eukaryotic translation elongation factor 1 complex              | -                      | -      | 1    |
| GO:0000980 | F            | RNA polymerase II distal enhancer sequence-specific DNA binding | -                      | -      | 1    |
| GO:0030307 | P            | positive regulation of cell growth                              | -                      | -      | 1    |
| GO:0000979 | F            | RNA polymerase II core promoter sequence-specific DNA binding   | -                      | -      | 1    |
| GO:0006228 | P            | UTP biosynthetic process                                        | -                      | -      | 1    |
| GO:0032465 | P            | regulation of cytokinesis                                       | -                      | -      | 1    |
| GO:0006183 | P            | GTP biosynthetic process                                        | -                      | -      | 1    |
| GO:0006165 | P            | nucleoside diphosphate phosphorylation                          | -                      | -      | 1    |
| GO:0008308 | F            | voltage-gated anion channel activity                            | -                      | -      | 1    |
| GO:0030018 | C            | Z disc                                                          | -                      | -      | 1    |
| GO:0044070 | P            | regulation of anion transport                                   | -                      | -      | 1    |
| GO:0090304 | P            | nucleic acid metabolic process                                  | -                      | -      | 5    |
| GO:0070469 | C            | respiratory chain                                               | -                      | -      | 3    |
| GO:0015992 | P            | proton transport                                                | -                      | -      | 4    |

**Table S3 – Target genes studied in this report and their corresponding VectorBase codes.** Codes: NTE – N-terminus missing in gap, CTE – C-terminus missing in gap, INT – internal exon missing in gap, FIX – assembly was repaired; JOI – gene model spans scaffolds; FX - gene model repaired based on de novo transcriptome assemblies. Multiple suffixes are abbreviated to single letters). Absent: Genes without VectorBase code.\*\* Protein families included in the sensory scatter plot.

| Odorant receptors | VectorBase code |
|-------------------|-----------------|
| Orco              | RPRC000476      |
| Or1               | RPRC000579      |
| Or2               | RPRC001689      |
| Or3               | RPRC000059      |
| Or4               | RPRC000120      |
| Or5               | RPRC000083      |
| Or6-Pseudogene    | -               |
| Or7               | RPRC002152      |
| Or8               | RPRC001154      |
| Or9               | RPRC000895      |
| Or10-Pseudogene   | -               |
| Or11-Pseudogene   | -               |
| Or12NTE           | RPRC000376      |
| Or13              | RPRC000362      |
| Or14              | RPRC000166      |
| Or15-Pseudogene   | -               |
| Or16              | RPRC000420      |
| Or17              | RPRC001628      |
| Or18              | RPRC000616      |
| Or19-CTE          | RPRC000449      |
| Or20              | RPRC000573      |
| Or21              | RPRC006570      |
| Or22              | RPRC000375      |
| Or23              | RPRC000149      |
| Or24              | RPRC001980      |
| Or25              | RPRC000029      |
| Or26              | RPRC000619      |
| Or27-FIX          | RPRC000331      |
| Or28-FIX          | Not in VB       |
| Or29-CTE          | RPRC000125      |
| Or30              | RPRC000209      |
| Or31              | RPRC000423      |
| Or32              | RPRC000043      |
| Or33              | RPRC000235      |
| Or34-JOI          | Not in VB       |
| Or35-Pseudogene   |                 |
| Or36              | RPRC000337      |
| Or37              | RPRC000456      |
| Or38              | RPRC000530      |

| <b>Odorant receptors</b> | <b>VectorBase code</b> |
|--------------------------|------------------------|
| Or39                     | RPRC000041             |
| Or40                     | RPRC000229             |
| Or41                     | RPRC000146             |
| Or42                     | RPRC000108             |
| Or43                     | RPRC000140             |
| Or44                     | RPRC001291             |
| Or45-FIX                 | Not in VB              |
| Or46                     | RPRC001292             |
| Or47                     | RPRC000413             |
| Or48                     | RPRC001293             |
| Or49                     | RPRC000433             |
| Or50                     | RPRC001623             |
| Or51                     | RPRC000507             |
| Or52                     | RPRC000201             |
| Or53                     | RPRC002122             |
| Or54                     | RPRC000055             |
| Or55                     | RPRC002161             |
| Or56                     | RPRC002162             |
| Or57                     | RPRC000318             |
| Or58                     | RPRC000526             |
| Or59-JC                  | RPRC004587             |
| Or60                     | RPRC002105             |
| Or61                     | RPRC000208             |
| Or62                     | RPRC002135             |
| Or63                     | RPRC002136             |
| Or64-NTE                 | RPRC000095             |
| Or65-NTE                 | RPRC000132             |
| Or66-NTE                 | RPRC000452             |
| Or67                     | RPRC000222             |
| Or68                     | RPRC000541             |
| Or69-NTE                 | Not in VB              |
| Or70-FX                  | RPRC000459             |
| Or71-NTE                 | RPRC000490             |
| Or72                     | RPRC000053             |
| Or73                     | RPRC000585             |
| Or74-NTE                 | RPRC000200             |
| Or75-NTE                 | RPRC000245             |
| Or76-NTE                 | RPRC001928             |
| Or77-NTE                 | RPRC000468             |
| Or78-NTE                 | RPRC000733             |
| Or79-FX                  | RPRC000202             |
| Or80-FX                  | RPRC000441             |
| Or81-NTE                 | RPRC000363             |
| Or82-FX                  | RPRC002113             |
| Or83-FX                  | RPRC006981             |



| <b>Odorant receptors</b> | <b>VectorBase code</b> |
|--------------------------|------------------------|
| Or84-FX                  | RPRC000431             |
| Or85-NTE                 | RPRC000882             |
| Or86-NTE                 | RPRC000079             |
| Or87-FX                  | RPRC000317             |
| Or88-NTE                 | RPRC000607             |
| Or89-FX                  | RPRC000165             |
| Or90-NTE                 | RPRC000249             |
| Or91-NTE                 | RPRC000093             |
| Or92-FX                  | RPRC002009             |
| Or93-NTE                 | RPRC002158             |
| Or94-NTE                 | RPRC002156             |
| Or95-FX                  | RPRC002157             |
| Or96-NTE                 | RPRC001767             |
| Or97-FX                  | RPRC002120             |
| Or98-FX                  | RPRC000136             |
| Or99-FX                  | RPRC000065             |
| Or100-NTE                | RPRC000522             |
| Or101                    | RPRC000188             |
| Or102                    | Not in VB              |
| Or103                    | RPRC000601             |
| Or104-FIX                | RPRC009806             |
| Or105                    | RPRC000255             |
| Or106                    | RPRC000371             |
| Or107-FX                 | RPRC001726             |
| Or108                    | RPRC000301             |
| Or109-NTE                | RPRC001799             |
| Or110-FX                 | RPRC002141             |
| Or111-FX                 | RPRC002142             |
| Or112                    | RPRC000555             |
| Or113                    | RPRC001309             |
| Or114                    | RPRC004306             |
| Or115-FIX                | Not in VB              |

| <b>Ionotropic receptors**</b> | <b>Comments</b> |
|-------------------------------|-----------------|
| Ir25a                         | RPRC000589      |
| Ir8a                          | RPRC000349      |
| Ir76b                         | RPRC000469      |
| Ir93a-FX                      | RPRC008486      |
| Ir21a-FX                      | RPRC001826      |
| Ir68a-FX                      | RPRC00328       |
| Ir40a-FX                      | RPRC000383      |
| Ir41a-FX                      | RPRC000191      |
| Ir41b-FIX                     | RPRC000489      |
| Ir41c                         | RPRC013097      |
| Ir75a-FX                      | RPRC002112      |

|           |            |                          |
|-----------|------------|--------------------------|
| Ir75b     | RPRC017348 |                          |
| Ir75c     | RPRC017347 |                          |
| Ir75d-FIX | RPRC000105 | Pseudogene in the genome |
| Ir75e-FX  | RPRC000047 |                          |
| Ir75f-FX  | RPRC002124 |                          |
| Ir75g-FIX | RPRC017347 | Pseudogene in the genome |
| Ir75h     | RPRC017355 |                          |
| Ir75i     | RPRC017354 |                          |
| Ir75j     | RPRC017353 |                          |
| Ir75k     | RPRC000314 |                          |
| Ir75l     | RPRC017352 |                          |
| Ir75m     | RPRC000247 |                          |
| Ir75n     | RPRC000007 |                          |
| Ir75o     | RPRC017345 |                          |
| Ir75p     | RPRC017346 |                          |
| Ir101     | RPRC005659 |                          |
| Ir102     | RPRC000847 |                          |
| Ir103-FX  | RPRC000379 |                          |
| Ir104     | RPRC002996 |                          |
| Ir105-FX  | RPRC000538 |                          |
| Ir106-FX  | RPRC000846 |                          |
| Ir107-NTE | RPRC000385 |                          |

#### **Gustatory receptors\*\***

---

|         |            |
|---------|------------|
| Gr1FX   | RPRC001549 |
| Gr2FX   | RPRC002023 |
| Gr3     | RPRC001795 |
| Gr4     | RPRC000056 |
| Gr5     | RPRC001197 |
| Gr6     | RPRC000553 |
| Gr7     | RPRC001196 |
| Gr8     | RPRC001195 |
| Gr9     | RPRC000388 |
| Gr10    | RPRC000106 |
| Gr11    | RPRC001194 |
| Gr12FIX | RPRC002134 |
| Gr13    | RPRC002133 |
| Gr14a   | RPRC008717 |
| Gr14b   | RPRC008717 |
| Gr15    | RPRC001115 |
| Gr16    | RPRC000730 |
| Gr17    | RPRC001279 |
| Gr18    | RPRC000336 |
| Gr19    | RPRC000763 |
| Gr20    | RPRC000451 |
| Gr21    | RPRC000130 |

|       |            |
|-------|------------|
| Gr22  | RPRC000073 |
| Gr23a | RPRC017351 |
| Gr23b | RPRC017351 |
| Gr24  | RPRC001956 |
| Gr25  | RPRC000216 |
| Gr26  | RPRC000368 |
| Gr27  | RPRC000068 |
| Gr28  | RPRC000290 |

#### **Odorant binding proteins**

---

|         |                             |
|---------|-----------------------------|
| OBP1    | RPRC010284                  |
| OBP2    | RPRC000378                  |
| OBP3    | RPRC000527                  |
| OBP4    | RPRC000274                  |
| OBP5    | RPRC000221 –<br>Coding erro |
| OBP6    | RPRC004413                  |
| OBP7    | RPRC000311                  |
| OBP8FX  | RPRC000564                  |
| OBP9    | RPRC000194                  |
| OBP10   | RPRC000560                  |
| OBP11   | RPRC004408                  |
| OBP12   | RPRC000492                  |
| OBP13FX | RPRC000177                  |
| OBP14   | RPRC004407                  |
| OBP15   | RPRC008413                  |
| OBP16   | RPRC011610                  |
| OBP17   | RPRC000118                  |
| OBP18FX | RPRC001924                  |
| OBP19FX | RPRC000593                  |
| OBP20   | RPRC007008                  |
| OBP21   | RPRC001925                  |
| OBP22FX | RPRC000115                  |
| OBP23FX | RPRC000174                  |
| OBP24   | RPRC009905                  |
| OBP25FX | RPRC000257                  |
| OBP26   | RPRC000182                  |
| OBP27   | RPRC009914                  |

#### **Chemosensory proteins**

---

|        |            |
|--------|------------|
| CSP1   | RPRC013223 |
| CSP2   | RPRC013221 |
| CSP3FX | RPRC013280 |
| CSP4   | RPRC013285 |
| CSP5FX | RPRC013218 |
| CSP6   | RPRC000332 |
| CSP7   | RPRC010107 |

|           |            |
|-----------|------------|
| CSP8      | RPRC000631 |
| CSP9      | RPRC000470 |
| CSP10     | RPRC007979 |
| CSP11     | RPRC011935 |
| CSP12     | RPRC011928 |
| CSP13     | RPRC011926 |
| CSP14     | RPRC006791 |
| CSP15-NTE | RPRC000546 |
| CSP16     | RPRC000327 |
| CSP17FX   | RPRC007134 |
| CSP18     | RPRC000242 |
| CSP19     | RPRC000126 |

#### **CHEb\*\***

---

|          |            |
|----------|------------|
| CHEB1-FX | RPRC004662 |
| CHEB2    | RPRC004663 |
| CHEB3    | RPRC004664 |
| CHEB4    | RPRC004665 |
| CHEB5    | RPRC004666 |

#### **SNMP y CD36**

---

|                     |            |
|---------------------|------------|
| SNMP1A**            | RPRC013907 |
| SNMP1B-FX**         | RPRC013910 |
| SNMP1c-NT**         | RPRC000399 |
| SNMPd1**            | RPRC002720 |
| SNMP2-FX **         | RPRC002754 |
| SCR3-FX             | RPRC010585 |
| SCR5-FX             | RPRC013192 |
| SCR6-FX             | RPRC006064 |
| SCR7                | RPRC001716 |
| SCR8A-FX            | RPRC015098 |
| SCR8b-FX            | RPRC003042 |
| SCR8c-FX            | RPRC012472 |
| SCR8d-FX            | RPRC003036 |
| SCR8e-FX            | RPRC003038 |
| SCR9-FX             | RPRC013775 |
| Group2 <sup>a</sup> | RPRC006308 |
| Group2b-a           | RPRC015150 |
| Grop2b-b            | RPRC009306 |

#### **Transient receptor potential channel\*\***

---

|         |            |
|---------|------------|
| NAN     | Absent     |
| IAV-FX  | RPRC002111 |
| NOMPC   | RPRC000544 |
| PAIN-FX | RPRC000454 |

#### VectorBase code

#### Comments

|                 |            |                   |
|-----------------|------------|-------------------|
| TRPA1 ISOFORM A | RPRC000422 |                   |
| TRPA1 ISOFORM B | RPRC000422 |                   |
| WTRW            | RPRC000127 |                   |
| TRPA5A          | RPRC001596 | Former annotation |
| TRPA5B-FX       | RPRC001597 | <i>Pyrexia</i>    |
| TRPA5C-FX       | RPRC000570 |                   |
| TRP-GAMMA       | RPRC000350 |                   |
| TRPL            | RPRC000224 |                   |
| PKD2            | RPRC014320 |                   |
| TRPM            | RPRC007108 |                   |
| TRPML-FX        | RPRC009679 |                   |

#### **Pickpocket receptors \*\***

---

|               |            |
|---------------|------------|
| PPK-LIKE1     | RPRC013510 |
| PPK-LIKE2     | RPRC000471 |
| PPK-LIKE3     | Absent     |
| PKK-LIKE4     | RPRC000341 |
| PPK-LIKE5     | Absent     |
| PPK-LIKE6     | Absent     |
| PPK-LIKE7-FX  | Absent     |
| PPK-LIKE8     | RPRC014276 |
| PPK-LIKE9     | RPRC000099 |
| PPK-LIKE10-FX | RPRC000048 |

#### **Ammonium transporters**

---

|                                   |            |                              |
|-----------------------------------|------------|------------------------------|
| Ammonium Transporter 1-FX         | RPRC006389 |                              |
| Ammonium Transporter 3-FX         | RPRC014483 | Former annotation RPRC004093 |
| Ammonium Transporter Rh50 like-FX | RPRC007650 | Former annotation RPRC007228 |

#### **Potential odorant degrading enzymes**

---

Secreted Esterases belonging to detox/  
pheromone hormone processing class

---

RPRC012523  
RPRC003733  
RPRC014623  
RPRC010263  
RPRC003566  
RPRC010259  
RPRC010265  
RPRC014627  
RPRC004681  
RPRC003620

---

#### **CYP4 clade from CPY450s**

---

|        |            |
|--------|------------|
| CYP4g  | RPRC003227 |
| CYP4P  | RPRC007300 |
| CYP4GG | RPRC013847 |
| CYP4u  | RPRC013652 |

|           |            |
|-----------|------------|
| CYP4E     | RPRC004731 |
| CYP4D     | RPRC004769 |
| CYP4a     | RPRC000027 |
| CYP4Y     | RPRC007947 |
| CYP4H     | RPRC004733 |
| CYP3093A2 | RPRC005136 |
| CYP4F     | RPRC004766 |
| CYP4EM3   | RPRC000196 |
| CYP4EM6   | RPRC004758 |
| CYP4T     | RPRC007952 |
| CYP4V     | RPRC002974 |
| CYP417a   | RPRC000172 |
| CYP4c     | RPRC000277 |
| CYP3093A7 | RPRC002132 |
| CYP4I     | RPRC013674 |
| CYP3097A9 | RPRC003225 |
| CYP4C75   | RPRC015287 |
| CYP3093A8 | RPRC005184 |

**Table S4-** Reference and target genes used to validate RNA-Seq data by means of qRT-PCR, their primer sequences, amplicon and intron lengths (base pairs-bp), squared correlation coefficient (R), and qRT-PCR efficiency (E).

| Gene                | Primer sequence (5'to 3')                                        | Amplicon length (bp) | Intron length (bp)   | R <sup>2</sup> | E (%)  |
|---------------------|------------------------------------------------------------------|----------------------|----------------------|----------------|--------|
| <i>G6PDH</i>        | For- AGCCTGGAGAAGCGGTTTACGTTA /<br>Rev- GTGAGCCACAGAATACGTCGAGT  | 162                  | 923                  | 0.994          | 103.9  |
| <i>Tub</i>          | For- TGTGCCCAAGGATGTGAACG /<br>Rev- CACAGTGGGTGGTTGGTAGTTGAT     | 118                  | 202                  | 0.999          | 100    |
| <i>Orco</i>         | For- GATCTGCACTGTTGCTGCAC /<br>Rev- CCATGGATGCAGAACACAAA         | 157                  | Exon/Intron junction | 0.988          | 97.1   |
| <i>Ir8a</i>         | For- TGCAGTCCAACAAGGTAGTCAC /<br>Rev- GCGTAATGCCTTCATCTTCGTC     | 155                  | 295                  | 0.993          | 105.8  |
| <i>Ir25a</i>        | For- AAGATGTGGCAGGCAATGAAGG /<br>Rev- CTGTTGCATCACCAAGGAAAGC     | 118                  | 732                  | 0.997          | 89.7   |
| <i>Ir76b</i>        | For- GCGTTTGCGTACCAATGGACA /<br>Rev- GCGTCCGGTAGATCCAAAGTGATT    | 113                  | 1,055                | 0.981          | 77     |
| <i>Or13</i>         | For- GCTGGTGACTGTTTGATGGG /<br>Rev- CGAGCCGTAATAATCCAGATCC       | 195                  | 298                  | 0.98           | 113,5  |
| <i>Or18</i>         | For- CAAGTTGGCCTGATCGTGTC /<br>Rev- CTTCTCGGAGGTTTTCGCTG         | 115                  | Exon/Intron junction | 0.989          | 97.7   |
| <i>Or20</i>         | For- GTGACGGGAAGATTACGACG /<br>Rev- AGTAATTCGCTCGCATCACT         | 115                  | Exon/Intron junction | 0.994          | 97.4   |
| <i>Or53</i>         | For- TTGTACGACTGCCCTTGGA /<br>Rev- ATGTAGGAATACGCAGCTTGT         | 169                  | 377                  | 0.979          | 87.1   |
| <i>Ir93a</i>        | For- TTGCCATCACTGGAGATCAATAGG /<br>Rev- GGTTGGATCTACCAAGTCCAACAG | 105                  | 192                  | 0.991          | 91.5   |
| <i>Ir21a</i>        | For- TGTAAGTCTTGCAATTCCTCC /<br>Rev- GCCAGTTGATCTTTCCTGCA        | 164                  | Exon/Intron junction | 0.982          | 107.5  |
| <i>Ir75e</i>        | For- CACCGTCACGGAAGTTGAACTA /<br>Rev- CTGTGCACCATCTATTCCAGTCA    | 193                  | 270                  | 0,995          | 95,1   |
| <i>Gr26</i>         | For- TTGAAGTTGACTGCATTCGG /<br>Rev- CTTCCGTTCACTGGCATTG          | 124                  | 350                  | 0.986          | 107.9  |
| <i>TRPA1</i>        | For- ACTTTAGATTCTCAAGGACAGCT /<br>Rev- GCCAGGTACACTTTGCAGTT      | 117                  | 1,748                | 0.993          | 84.8   |
| <i>lav</i>          | For- TAAACCAAACAGAGTCGCC /<br>Rev- TAATGGGTCTGGTGGTGAGT          | 106                  | Intro-Exon junction  | 0.988          | 110    |
| <i>Piezo</i>        | For- TGCGGTGATCCAGTTTATGAA /<br>Rev- AGTGTACAGTCCAATGATCCCT      | 144                  | Intro-Exon junction  | 0.943          | 130    |
| <i>foraging</i>     | For- AGTTCGAAGGTCTGCGACTG /<br>Rev- GCCCATGATCTCCTTCTCGG         | 191                  | 3,064                | 0.997          | 107.7  |
| <i>period</i>       | For- CTACAGCAGCCAAAAGAAGA /<br>Rev- GTAAGTAGCCGACGGACCAG         | 105                  | 1,054                | 0.996          | 103.9  |
| <i>pp2a</i>         | For- GCATCCGATTCAGTTCCCAA /<br>Rev- CCATCGCCTCAGAAGCAAAA         | 166                  | 4,650                | 0.997          | 90.2   |
| <i>Ogt</i>          | For- TGCTGCTTTGAAGAACAATTCC /<br>Rev- CATGGATTCTATGAACAAATCG     | 119                  | 601                  | 0.975          | 120    |
| <i>Cryptochrome</i> | For- AGAAATCCTGAGGCTCTTGC /<br>Rev- TGCGTGTCTTGCCAAATG           | 117                  | 956                  | 0.999          | 86.2   |
| <i>timeless</i>     | For- ACATGCACATGGCTGGAG /<br>Rev- ATTAACAACATCGCCACAG            | 97                   | 723                  | 0.996          | 109.6  |
| <i>Saggy</i>        | For- GTATTGGGAACACCGACCAG /<br>Rev- CTCGCTCGGAATACCTTCTG         | 110                  | 4,903                | 0.994          | 104.9  |
| <i>CKII-beta</i>    | For- CAGTTCGTTCCAAGGTTGTATG /<br>Rev- TCATCGCTCGTAAAGGTGTC       | 100                  | 714                  | 0.985          | 99.5   |
| <i>Nocte</i>        | For- TATCCACCACAAGGCAACC /<br>Rev- TTTGATGCTGAAGTGTGTTCTC        | 101                  | 1,265                | 0.997          | 110.75 |
| <i>Takeout</i>      | For- GCTTTAGGCAACACCATGAAC /<br>Rev- GCCAAAGCTGGAGACAATTC        | 77                   | 1,339                | 0.982          | 121.5  |

**Table S5 – Transcript abundances for 25 validation genes obtained using qRT-PCR and RNA-Seq techniques.**

| Gene            | Larvae vs. Female            |                                | Larvae vs. Male              |                                | Male vs. Female              |                                |
|-----------------|------------------------------|--------------------------------|------------------------------|--------------------------------|------------------------------|--------------------------------|
|                 | Transcript abundance by qPCR | Transcript abundance by RNAseq | Transcript abundance by qPCR | Transcript abundance by RNAseq | Transcript abundance by qPCR | Transcript abundance by RNAseq |
| <i>Ckllb</i>    | 0.85                         | 0.57                           | 0.72                         | 0.34                           | 0.85                         | 0.60                           |
| <i>Cryp</i>     | 0.95                         | 1.72                           | 1.30                         | 1.20                           | 1.37                         | 0.70                           |
| <i>For</i>      | 0.57                         | 0.49                           | 0.74                         | 0.33                           | 1.30                         | 0.67                           |
| <i>Gr26</i>     | 0.49                         | 0.81                           | 0.52                         | 0.46                           | 1.06                         | 0.57                           |
| <i>lav</i>      | 1.21                         | 0.71                           | 1.09                         | 0.76                           | 0.90                         | 1.07                           |
| <i>Ir21a</i>    | 2.20                         | 5.58                           | 2.70                         | 3.71                           | 1.23                         | 0.67                           |
| <i>Ir25a</i>    | 1.92                         | 2.27                           | 1.79                         | 2.87                           | 0.93                         | 1.27                           |
| <i>Ir75c</i>    | 3.94                         | 8.65                           | 3.21                         | 8.65                           | 0.81                         | 2.51                           |
| <i>Ir76b</i>    | 8.24                         | 1.55                           | 13.04                        | 8.28                           | 1.58                         | 5.33                           |
| <i>Ir8a</i>     | 4.52                         | 2.58                           | 6.31                         | 13.56                          | 1.40                         | 5.25                           |
| <i>Ir93a</i>    | 3.08                         | 2.31                           | 3.83                         | 2.04                           | 1.24                         | 0.88                           |
| <i>Nocte</i>    | 1.37                         | 0.70                           | 1.17                         | 0.63                           | 0.85                         | 0.90                           |
| <i>Ogt</i>      | 0.80                         | 1.12                           | 1.00                         | 0.78                           | 1.26                         | 0.70                           |
| <i>Or13</i>     | 6.30                         | 26.06                          | 5.42                         | 14.48                          | 0.86                         | 0.56                           |
| <i>Or18</i>     | 11.97                        | 25.33                          | 12.06                        | 11.95                          | 1.01                         | 0.47                           |
| <i>Or20</i>     | 3.00                         | 9.55                           | 2.82                         | 6.78                           | 0.94                         | 0.71                           |
| <i>Or53</i>     | 3.25                         | 18.27                          | 3.09                         | 13.39                          | 0.95                         | 0.73                           |
| <i>Orco</i>     | 5.43                         | 11.70                          | 5.36                         | 18.03                          | 0.99                         | 1.54                           |
| <i>Per</i>      | 0.56                         | 0.61                           | 0.85                         | 0.43                           | 1.52                         | 0.69                           |
| <i>Piezo</i>    | 2.40                         | 1.57                           | 3.85                         | 2.30                           | 1.61                         | 1.47                           |
| <i>Pp2a</i>     | 0.94                         | 0.54                           | 1.07                         | 0.43                           | 1.14                         | 0.79                           |
| <i>Ssg</i>      | 2.30                         | 1.08                           | 2.03                         | 1.66                           | 0.88                         | 1.54                           |
| <i>Takeout</i>  | 0.21                         | 0.12                           | 0.18                         | 0.06                           | 0.85                         | 0.50                           |
| <i>Timeless</i> | 3.12                         | 1.55                           | 7.67                         | 1.73                           | 2.46                         | 1.12                           |
| <i>Trpa1</i>    | 0.76                         | 1.14                           | 0.99                         | 1.16                           | 1.31                         | 1.01                           |



**Table S6 – FPKM fold change of ORs and IRs in larval antennae compared to male and female adult antennae; and FPKM fold change of IRs in male compared to female antennae.** Genes shown here with red values were not included in Supplementary Figs. S3 and S4. OR pseudogenes (Or6, Or10, Or11, Or15 and Or35) were not included in Supplementary Fig. S3.

| Gene  | FPKM larvae | FPKM female | FPKM male | FPKM fold change larvae vs female | FPKM fold change larvae vs male |
|-------|-------------|-------------|-----------|-----------------------------------|---------------------------------|
| Or42  | -           | 1.14        | 2.19      | -                                 | -                               |
| Or59  | -           | 0.14        | 0.00      | -                                 | -                               |
| Or2   | -           | 0.00        | 0.14      | -                                 | -                               |
| Or109 | -           | 0.25        | 1.03      | -                                 | -                               |
| Or24  | -           | 0.12        | 0.43      | -                                 | -                               |
| Or90  | 0.02        | 0.23        | 0.16      | 9.20                              | 6.71                            |
| Or50  | 0.05        | 2.72        | 11.65     | 55.16                             | 236.44                          |
| Or56  | 0.05        | 9.06        | 8.34      | 181.57                            | 167.15                          |
| Or91  | 0.10        | 0.00        | 0.00      | 0.00                              | 0.00                            |
| Or21  | 0.11        | 0.13        | 0.16      | 1.19                              | 1.42                            |
| Or93  | 0.12        | 2.35        | 2.29      | 20.23                             | 19.70                           |
| Or62  | 0.16        | 0.24        | 5.08      | 1.49                              | 30.85                           |
| Or75  | 0.17        | 0.58        | 0.55      | 3.52                              | 3.29                            |
| Or31  | 0.17        | 0.91        | 1.75      | 5.32                              | 10.25                           |
| Or29  | 0.18        | 0.39        | 0.17      | 2.23                              | 0.98                            |
| Or88  | 0.19        | 1.58        | 1.70      | 8.15                              | 8.74                            |
| Or41  | 0.21        | 2.53        | 3.03      | 11.93                             | 14.29                           |
| Or63  | 0.22        | 1.77        | 1.20      | 8.21                              | 5.55                            |
| Or85  | 0.22        | 0.70        | 1.08      | 3.22                              | 4.94                            |
| Or80  | 0.22        | 3.06        | 3.09      | 13.72                             | 13.89                           |
| Or68  | 0.24        | 2.34        | 2.00      | 9.87                              | 8.42                            |
| Or52  | 0.24        | 0.71        | 0.62      | 2.96                              | 2.60                            |
| Or16  | 0.26        | 0.78        | 0.82      | 2.98                              | 3.13                            |
| Or69  | 0.28        | 0.91        | 0.50      | 3.27                              | 1.81                            |
| Or60  | 0.30        | 0.88        | 0.28      | 2.94                              | 0.92                            |
| Or86  | 0.33        | 2.42        | 2.86      | 7.40                              | 8.71                            |
| Or108 | 0.33        | 1.86        | 1.25      | 5.58                              | 3.77                            |
| Or84  | 0.34        | 4.30        | 8.36      | 12.60                             | 24.47                           |
| Or114 | 0.34        | 0.73        | 1.40      | 2.12                              | 4.08                            |
| Or23  | 0.38        | 0.38        | 0.69      | 0.99                              | 1.82                            |
| Or65  | 0.40        | 1.62        | 0.91      | 4.09                              | 2.30                            |
| Or49  | 0.40        | 2.46        | 1.96      | 6.15                              | 4.90                            |
| Or46  | 0.41        | 6.27        | 10.10     | 15.37                             | 24.75                           |
| Or38  | 0.41        | 0.90        | 1.15      | 2.19                              | 2.80                            |
| Or104 | 0.43        | 2.05        | 1.00      | 4.76                              | 2.33                            |
| Or81  | 0.43        | 1.20        | 0.86      | 2.78                              | 1.98                            |
| Or3   | 0.47        | 5.40        | 3.77      | 11.61                             | 8.10                            |

| Gene  | FPKM larvae | FPKM female | FPKM male | FPKM fold change larvae vs female | FPKM fold change larvae vs male |
|-------|-------------|-------------|-----------|-----------------------------------|---------------------------------|
| Or22  | 0.50        | 0.70        | 0.79      | 1.39                              | 1.57                            |
| Or54  | 0.51        | 9.99        | 6.27      | 19.54                             | 12.26                           |
| Or107 | 0.52        | 1.97        | 1.78      | 3.81                              | 3.45                            |
| Or43  | 0.56        | 1.48        | 1.29      | 2.62                              | 2.28                            |
| Or73  | 0.57        | 0.80        | 0.69      | 1.40                              | 1.21                            |
| Or106 | 0.58        | 4.01        | 4.25      | 6.91                              | 7.31                            |
| Or111 | 0.65        | 3.56        | 3.38      | 5.47                              | 5.19                            |
| Or5   | 0.68        | 4.61        | 4.65      | 6.81                              | 6.86                            |
| Or7   | 0.69        | 2.16        | 2.55      | 3.12                              | 3.68                            |
| Or82  | 0.70        | 1.79        | 1.15      | 2.58                              | 1.65                            |
| Or95  | 0.70        | 0.78        | 1.55      | 1.11                              | 2.20                            |
| Or64  | 0.72        | 2.56        | 1.58      | 3.55                              | 2.18                            |
| Or113 | 0.73        | 2.87        | 4.00      | 3.95                              | 5.51                            |
| Or74  | 0.74        | 9.38        | 7.86      | 12.76                             | 10.70                           |
| Or92  | 0.75        | 3.08        | 3.67      | 4.11                              | 4.89                            |
| Or1   | 0.75        | 4.76        | 4.16      | 6.31                              | 5.51                            |
| Or44  | 0.76        | 8.86        | 7.33      | 11.73                             | 9.71                            |
| Or17  | 0.76        | 0.00        | 0.05      | 0.00                              | 0.06                            |
| Or101 | 0.78        | 9.76        | 9.39      | 12.55                             | 12.06                           |
| Or48  | 0.78        | 3.45        | 4.29      | 4.41                              | 5.50                            |
| Or67  | 0.84        | 7.64        | 4.26      | 9.14                              | 5.10                            |
| Or40  | 0.84        | 12.23       | 8.04      | 14.56                             | 9.57                            |
| Or55  | 0.90        | 6.78        | 5.12      | 7.57                              | 5.72                            |
| Or33  | 0.94        | 12.51       | 6.59      | 13.37                             | 7.04                            |
| Or26  | 0.94        | 5.13        | 6.83      | 5.45                              | 7.26                            |
| Or27  | 0.95        | 7.10        | 3.60      | 7.49                              | 3.80                            |
| Or37  | 0.97        | 10.37       | 8.14      | 10.69                             | 8.40                            |
| Or70  | 0.98        | 2.57        | 3.15      | 2.61                              | 3.20                            |
| Or89  | 0.99        | 8.50        | 8.12      | 8.61                              | 8.23                            |
| Or79  | 1.01        | 5.23        | 8.48      | 5.17                              | 8.38                            |
| Or98  | 1.04        | 8.91        | 8.26      | 8.57                              | 7.95                            |
| Or25  | 1.04        | 2.73        | 2.02      | 2.63                              | 1.94                            |
| Or32  | 1.04        | 6.27        | 4.00      | 6.02                              | 3.84                            |
| Or115 | 1.07        | 3.07        | 1.71      | 2.88                              | 1.61                            |
| Or99  | 1.08        | 5.64        | 5.70      | 5.23                              | 5.29                            |
| Or13  | 1.14        | 29.68       | 16.50     | 26.06                             | 14.48                           |
| Or30  | 1.17        | 2.51        | 1.91      | 2.15                              | 1.63                            |
| Or8   | 1.23        | 5.47        | 2.69      | 4.45                              | 2.19                            |
| Or78  | 1.24        | 25.01       | 20.76     | 20.12                             | 16.70                           |
| Or39  | 1.28        | 16.00       | 22.73     | 12.46                             | 17.70                           |
| Or28  | 1.29        | 3.48        | 2.76      | 2.70                              | 2.14                            |
| Or102 | 1.30        | 11.72       | 13.19     | 9.03                              | 10.17                           |

| Gene  | FPKM larvae | FPKM female | FPKM male | FPKM fold change larvae<br>vs female | FPKM fold change larvae<br>vs male |
|-------|-------------|-------------|-----------|--------------------------------------|------------------------------------|
| Or96  | 1.35        | 11.06       | 9.81      | 8.17                                 | 7.24                               |
| Or77  | 1.41        | 15.87       | 15.28     | 11.23                                | 10.81                              |
| Or36  | 1.42        | 12.77       | 11.77     | 8.99                                 | 8.28                               |
| Or110 | 1.52        | 19.37       | 17.70     | 12.74                                | 11.64                              |
| Or19  | 1.52        | 7.19        | 5.35      | 4.72                                 | 3.51                               |
| Or47  | 1.53        | 4.76        | 11.38     | 3.12                                 | 7.46                               |
| Or83  | 1.56        | 18.24       | 13.25     | 11.69                                | 8.50                               |
| Or97  | 1.60        | 3.20        | 4.42      | 2.00                                 | 2.77                               |
| Or51  | 1.65        | 2.36        | 3.71      | 1.43                                 | 2.25                               |
| Or94  | 1.82        | 5.21        | 4.89      | 2.87                                 | 2.70                               |
| Or34  | 2.07        | 11.54       | 7.99      | 5.57                                 | 3.86                               |
| Or45  | 2.15        | 9.59        | 10.65     | 4.46                                 | 4.96                               |
| Or71  | 2.41        | 6.94        | 3.82      | 2.88                                 | 1.59                               |
| Or112 | 2.43        | 11.99       | 7.42      | 4.93                                 | 3.05                               |
| Or4   | 2.50        | 4.52        | 3.75      | 1.81                                 | 1.50                               |
| Or12  | 2.55        | 3.58        | 3.06      | 1.40                                 | 1.20                               |
| Or53  | 2.86        | 52.25       | 38.29     | 18.27                                | 13.39                              |
| Or9   | 2.86        | 3.03        | 2.78      | 1.06                                 | 0.97                               |
| Or103 | 2.94        | 21.25       | 13.60     | 7.24                                 | 4.63                               |
| Or87  | 3.20        | 5.96        | 8.23      | 1.86                                 | 2.57                               |
| Or58  | 3.70        | 51.18       | 28.96     | 13.84                                | 7.83                               |
| Or72  | 3.91        | 6.88        | 7.46      | 1.76                                 | 1.91                               |
| Or61  | 4.32        | 49.35       | 24.02     | 11.42                                | 5.56                               |
| Or20  | 4.44        | 42.37       | 30.07     | 9.55                                 | 6.78                               |
| Or18  | 5.47        | 138.48      | 65.37     | 25.33                                | 11.95                              |
| Or100 | 6.10        | 32.55       | 31.62     | 5.33                                 | 5.18                               |
| Or105 | 7.91        | 24.41       | 23.17     | 3.09                                 | 2.93                               |
| Or57  | 9.69        | 8.44        | 9.81      | 0.87                                 | 1.01                               |
| Or14  | 12.48       | 12.86       | 6.33      | 1.03                                 | 0.51                               |
| Orco  | 12.95       | 151.56      | 233.53    | 11.70                                | 18.03                              |

| Gene  | FPKM larvae | FPKM female | FPKM male | FPKM fold change larvae vs female | FPKM fold change larvae vs male | FPKM fold change male vs female |
|-------|-------------|-------------|-----------|-----------------------------------|---------------------------------|---------------------------------|
| Ir101 | 0.00        | 0.00        | 0.00      | -                                 | -                               | -                               |
| Ir104 | 0.06        | 0.68        | 0.27      | 11.67                             | 4.73                            | 0.40                            |
| Ir102 | 0.10        | 0.23        | 0.17      | 2.38                              | 1.77                            | 0.74                            |
| Ir75k | 0.17        | 0.27        | 1.46      | 1.61                              | 8.55                            | 5.33                            |
| Ir103 | 0.19        | 0.42        | 0.34      | 2.18                              | 1.73                            | 0.80                            |
| Ir75f | 0.22        | 0.39        | 1.61      | 1.76                              | 7.35                            | 4.16                            |
| Ir41a | 0.26        | 0.09        | 1.43      | 0.36                              | 5.50                            | 15.24                           |
| Ir75p | 0.29        | 0.36        | 1.55      | 1.23                              | 5.38                            | 4.37                            |
| Ir75j | 0.33        | 0.51        | 1.82      | 1.53                              | 5.47                            | 3.58                            |
| Ir75l | 0.33        | 2.40        | 3.18      | 7.19                              | 9.52                            | 1.32                            |
| Ir75e | 0.52        | 1.86        | 4.57      | 3.55                              | 8.71                            | 2.45                            |
| Ir105 | 0.53        | 1.23        | 0.78      | 2.31                              | 1.45                            | 0.63                            |
| Ir75d | 0.58        | 1.58        | 3.67      | 2.74                              | 6.36                            | 2.32                            |
| Ir75m | 0.69        | 2.99        | 2.35      | 4.34                              | 3.40                            | 0.78                            |
| Ir75n | 0.71        | 0.61        | 3.52      | 0.86                              | 4.93                            | 5.73                            |
| Ir75i | 0.76        | 0.74        | 3.82      | 0.98                              | 5.03                            | 5.16                            |
| Ir8a  | 0.96        | 2.49        | 13.06     | 2.58                              | 13.56                           | 5.25                            |
| Ir76b | 1.12        | 1.75        | 9.31      | 1.55                              | 8.28                            | 5.33                            |
| Ir75g | 1.30        | 2.69        | 2.80      | 2.07                              | 2.15                            | 1.04                            |
| Ir68a | 1.37        | 3.18        | 4.65      | 2.32                              | 3.39                            | 1.46                            |
| Ir75b | 1.49        | 2.02        | 5.63      | 1.36                              | 3.77                            | 2.78                            |
| Ir40  | 1.56        | 3.02        | 3.50      | 1.93                              | 2.24                            | 1.16                            |
| Ir75h | 1.62        | 9.50        | 7.94      | 5.86                              | 4.90                            | 0.84                            |
| Ir107 | 1.71        | 1.02        | 0.66      | 0.59                              | 0.38                            | 0.65                            |
| Ir75o | 2.15        | 3.07        | 3.29      | 1.42                              | 1.53                            | 1.07                            |
| Ir21a | 3.34        | 18.64       | 12.40     | 5.58                              | 3.71                            | 0.67                            |
| Ir106 | 3.85        | 6.26        | 4.83      | 1.63                              | 1.26                            | 0.77                            |
| Ir25a | 4.53        | 10.29       | 13.03     | 2.27                              | 2.87                            | 1.27                            |
| Ir41b | 5.55        | 4.07        | 9.01      | 0.73                              | 1.62                            | 2.21                            |
| Ir41c | 5.58        | 8.66        | 13.25     | 1.55                              | 2.38                            | 1.53                            |
| Ir93a | 6.90        | 15.94       | 14.06     | 2.31                              | 2.04                            | 0.88                            |
| Ir75a | 7.52        | 43.32       | 38.71     | 5.76                              | 5.14                            | 0.89                            |
| Ir75c | 8.89        | 6.32        | 16.01     | 0.71                              | 1.80                            | 2.53                            |

**Table S7 – Statistical results of differentially expressed sensory genes among studied stages.** Comparison of normalized counts per million (CPM) among stages was conducted using edgeR package. LogFC: Log fold change; FDR adjusted p-value: false discovery rate. Asterisks indicate differentially expressed genes which had increased expression both in female and male libraries when compared to the larval on. Grey rows indicate those differentially expressed sensory genes with an FDR adjusted p-value <0.1 and ≥0.05.

| VectorBase Code  | Gene name     | LogFC       | P Value    | FDR        |
|------------------|---------------|-------------|------------|------------|
| Female vs Larvae |               |             |            |            |
| RPRC011935       | <i>Csp11</i>  | 4.6177639   | 2.03E-05   | 0.00543423 |
| RPRC004413       | <i>Obp6</i>   | 3.7337096   | 0.00033137 | 0.04369921 |
| RPRC000492*      | <i>Obp12</i>  | 4.1821106   | 8.20E-05   | 0.01432273 |
| RPRC001924       | <i>Obp18</i>  | 3.8870436   | 0.00020651 | 0.03026726 |
| RPRC000257       | <i>Obp25</i>  | 3.706511    | 0.00036841 | 0.0471979  |
| RPRC000362*      | <i>Or13</i>   | 4.7661175   | 1.60E-05   | 0.00471476 |
| RPRC000616       | <i>Or18</i>   | 4.5953717   | 2.27E-05   | 0.00585537 |
| RPRC000235       | <i>Or33</i>   | 3.9548902   | 0.00021066 | 0.03061596 |
| RPRC000229       | <i>Or40</i>   | 3.7800159   | 0.00037197 | 0.04730301 |
| RPRC000108*      | <i>Or42</i>   | 5.5382956   | 0.00030923 | 0.04113884 |
| RPRC001623*      | <i>Or50</i>   | 5.9073117   | 1.89E-05   | 0.0052805  |
| RPRC002122*      | <i>Or53</i>   | 4.1931722   | 8.71E-05   | 0.01488973 |
| RPRC000055       | <i>Or54</i>   | 4.0638092   | 0.00017001 | 0.0255673  |
| RPRC002162*      | <i>Or56</i>   | 7.7940823   | 3.71E-08   | 2.67E-05   |
| RPRC000526       | <i>Or58</i>   | 3.8404857   | 0.00025645 | 0.03618896 |
| RPRC000733*      | <i>Or78</i>   | 4.3605515   | 5.78E-05   | 0.01063686 |
| RPRC013907*      | <i>Snmp1a</i> | 4.141709    | 9.35E-05   | 0.01555242 |
| RPRC011926       | <i>Csp13</i>  | 3,5668544   | 0,00055353 | 0,06094844 |
| RPRC000311       | <i>Obp7</i>   | 3,3984865   | 0,00091251 | 0,08134937 |
| RPRC000177       | <i>Obp13</i>  | 3,5636428   | 0,0005568  | 0,06094844 |
| RPRC000118       | <i>Obp17</i>  | 3,4025256   | 0,00090084 | 0,08078139 |
| RPRC000476*      | <i>Orco</i>   | 3,6257646   | 0,00047016 | 0,05494155 |
| RPRC001628*      | <i>Or17</i>   | -5.11298295 | 0.00054051 | 0.0607387  |
| RPRC000337       | <i>Or36</i>   | 3.4458146   | 0.00103135 | 0.08918574 |
| RPRC000041*      | <i>Or39</i>   | 3.5437982   | 0.00070891 | 0.06926917 |
| RPRC001291       | <i>Or44</i>   | 3.5770097   | 0.00068945 | 0.06852904 |
| RPRC001292*      | <i>Or46</i>   | 3.5556707   | 0.00094406 | 0.08260624 |
| RPRC000208       | <i>Or61</i>   | 3.5621056   | 0.00058908 | 0.06259194 |
| RPRC000200*      | <i>Or74</i>   | 3.6689233   | 0.00057348 | 0.06160492 |
| RPRC000468*      | <i>Or77</i>   | 3.5871911   | 0.00061546 | 0.06373893 |
| RPRC006981       | <i>Or83</i>   | 3.6104178   | 0.00056403 | 0.06096787 |
| RPRC000431*      | <i>Or84</i>   | 3.8578002   | 0.00056242 | 0.06096787 |
| RPRC002158*      | <i>Or93</i>   | 3.9639634   | 0.00050038 | 0.0576933  |
| RPRC000188*      | <i>Or101</i>  | 3.6816444   | 0.00055654 | 0.06094844 |
| RPRC002141*      | <i>Or110</i>  | 3.6246434   | 0.00054084 | 0.0607387  |

| VectorBase Code | Gene name     | LogFC      | P Value    | FDR        |
|-----------------|---------------|------------|------------|------------|
| Male vs Larvae  |               |            |            |            |
| RPRC000492*     | <i>Obp12</i>  | 3.8224689  | 0.00025253 | 0.02260681 |
| RPRC000362*     | <i>Or13</i>   | 3.9130394  | 0.00023271 | 0.02096184 |
| RPRC000041      | <i>Or39</i>   | 3.9666731  | 0.00019725 | 0.01916505 |
| RPRC000108*     | <i>Or42</i>   | 6.4892913  | 1.38E-05   | 0.00220318 |
| RPRC001292      | <i>Or46</i>   | 4.2496605  | 0.00011301 | 0.01229268 |
| RPRC001623*     | <i>Or50</i>   | 8.0103594  | 1.47E-08   | 6.53E-06   |
| RPRC002122*     | <i>Or53</i>   | 3.6938235  | 0.00041309 | 0.0336999  |
| RPRC002162*     | <i>Or56</i>   | 7.5779548  | 6.41E-08   | 2.17E-05   |
| RPRC002135      | <i>Or62</i>   | 5.3271478  | 1.40E-05   | 0.00221892 |
| RPRC000733*     | <i>Or78</i>   | 3.9627857  | 0.00019926 | 0.01919703 |
| RPRC000431      | <i>Or84</i>   | 4.7891779  | 2.62E-05   | 0.00370926 |
| RPRC001799      | <i>Or109</i>  | 8.8306133  | 2.82E-05   | 0.00393288 |
| RPRC000476      | <i>Orco</i>   | 4.1239946  | 0.00010028 | 0.01118905 |
| RPRC013907*     | <i>Snmp1a</i> | 4.1743311  | 8.44E-05   | 0.00979137 |
| RPRC011935*     | <i>Csp11</i>  | 3.491218   | 0.00069117 | 0.0515252  |
| RPRC000349      | <i>Ir8a</i>   | 3.3822348  | 0.00104076 | 0.07171294 |
| RPRC001628*     | <i>Or17</i>   | 4.30274198 | 0.00132372 | 0.0857445  |
| RPRC000616*     | <i>Or18</i>   | 3.4190401  | 0.00088322 | 0.06338294 |
| RPRC001980      | <i>Or24</i>   | 7.7232531  | 0.00077626 | 0.05640957 |
| RPRC000146      | <i>Or41</i>   | 3.5572204  | 0.00115111 | 0.07807236 |
| RPRC000200*     | <i>Or74</i>   | 3.4363402  | 0.00109663 | 0.07496511 |
| RPRC000468*     | <i>Or77</i>   | 3.3209318  | 0.00138631 | 0.08880085 |
| RPRC000441      | <i>Or80</i>   | 3.5196305  | 0.0013427  | 0.08664938 |
| RPRC002158*     | <i>Or93</i>   | 3.7467987  | 0.00118704 | 0.07896118 |
| RPRC000188*     | <i>Or101</i>  | 3.5199762  | 0.00084971 | 0.06123249 |
| RPRC002141*     | <i>Or110</i>  | 3.4290217  | 0.00095651 | 0.06617165 |
| Male vs Female  |               |            |            |            |
| RPRC002135      | <i>Or62</i>   | 4.50093249 | 9.30E-05   | 0.03496851 |

**Table S8 – Number of reads mapped on sensory receptor genes in the three antennal libraries obtained by HTseq.**

| <b>VectorBase Code</b> | <b>Gene annotation</b> | <b>Larval reads</b> | <b>Female reads</b> | <b>Male reads</b> |
|------------------------|------------------------|---------------------|---------------------|-------------------|
| RPRC004662             | CHEB1                  | 648                 | 1,107               | 717               |
| RPRC004663             | CHEB2                  | 359                 | 700                 | 332               |
| RPRC004664             | CHEB3                  | 294                 | 561                 | 404               |
| RPRC004665             | CHEB4                  | 205                 | 613                 | 323               |
| RPRC004666             | CHEB5                  | 1,331               | 1,593               | 836               |
| RPRC006538             | chloride channel B1    | 717                 | 359                 | 876               |
| RPRC013530             | chloride channel B2    | 327                 | 191                 | 368               |
| RPRC013223             | CSP1                   | 52,642              | 47,151              | 19,488            |
| RPRC007979             | CSP10                  | 3,476               | 21,241              | 14,236            |
| RPRC011935             | CSP11                  | 117,101             | 2,401,988           | 1,193,677         |
| RPRC011928             | CSP12                  | 25,225              | 1,82,376            | 105,675           |
| RPRC011926             | CSP13                  | 1,288               | 12,753              | 9,664             |
| RPRC006791             | CSP14                  | 8                   | 26                  | 12                |
| RPRC000546             | CSP15                  | 29                  | 44                  | 28                |
| RPRC000327             | CSP16                  | 2,599               | 6,553               | 5,378             |
| RPRC007134             | CSP17                  | 23,677              | 18,964              | 11,872            |
| RPRC000242             | CSP18                  | 0                   | 1                   | 0                 |
| RPRC000126             | CSP19                  | 587                 | 708                 | 604               |
| RPRC013221             | CSP2                   | 22,437              | 16,083              | 10,290            |
| RPRC013280             | CSP3                   | 319,363             | 375,650             | 191,485           |
| RPRC013285             | CSP4                   | 360                 | 1,009               | 1,699             |
| RPRC013218             | CSP5                   | 89,857              | 98,833              | 43,414            |
| RPRC000332             | CSP6                   | 338                 | 490                 | 334               |
| RPRC010107             | CSP7                   | 361                 | 584                 | 443               |
| RPRC000631             | CSP8                   | 949                 | 909                 | 564               |
| RPRC000470             | CSP9                   | 96                  | 382                 | 340               |
| RPRC001549             | GR1                    | 116                 | 686                 | 465               |
| RPRC001194             | GR11                   | 42                  | 35                  | 55                |
| RPRC002133             | GR13                   | 0                   | 3                   | 9                 |
| RPRC008717             | GR14                   | 0                   | 0                   | 0                 |
| RPRC001115             | GR15                   | 10                  | 21                  | 26                |
| RPRC000730             | GR16                   | 10                  | 6                   | 2                 |
| RPRC001279             | GR17                   | 12                  | 5                   | 7                 |
| RPRC000336             | GR18                   | 1                   | 0                   | 0                 |
| RPRC000763             | GR19                   | 0                   | 3                   | 1                 |
| RPRC002023             | GR2                    | 269                 | 385                 | 443               |
| RPRC000451             | GR20                   | 62                  | 122                 | 323               |
| RPRC000130             | GR21                   | 26                  | 40                  | 33                |
| RPRC000073             | GR22                   | 25                  | 19                  | 120               |
| RPRC001956             | GR24                   | 30                  | 112                 | 180               |
| RPRC000216             | GR25                   | 95                  | 123                 | 89                |

| VectorBase Code | Gene annotation | Larval reads | Female reads | Male reads |
|-----------------|-----------------|--------------|--------------|------------|
| RPRC000368      | GR26            | 964          | 695          | 390        |
| RPRC000068      | GR27            | 937          | 1,021        | 825        |
| RPRC000290      | GR28            | 3,281        | 1,836        | 1,467      |
| RPRC001795      | GR3             | 72           | 20           | 33         |
| RPRC000056      | GR4             | 2            | 6            | 6          |
| RPRC001197      | GR5             | 2            | 1            | 7          |
| RPRC000553      | GR6             | 4            | 4            | 16         |
| RPRC001196      | GR7             | 44           | 11           | 17         |
| RPRC001195      | GR8             | 18           | 9            | 32         |
| RPRC000388      | GR9             | 13           | 23           | 60         |
| RPRC005659      | IR101           | 0            | 0            | 0          |
| RPRC000847      | IR102           | 10           | 14           | 12         |
| RPRC000379      | IR103           | 52           | 107          | 100        |
| RPRC002996      | IR104           | 4            | 40           | 17         |
| RPRC000538      | IR105           | 48           | 82           | 57         |
| RPRC000846      | IR106           | 299          | 421          | 345        |
| RPRC000385      | IR107           | 132          | 71           | 49         |
| RPRC001826      | IR21a           | 324          | 1,599        | 1,186      |
| RPRC000589      | IR25a           | 605          | 1,128        | 1,501      |
| RPRC000383      | IR40a           | 129          | 221          | 308        |
| RPRC000191      | IR41a           | 21           | 6            | 112        |
| RPRC000489      | IR41b           | 584          | 368          | 764        |
| RPRC013097      | IR41c           | 330          | 454          | 703        |
| RPRC003280      | IR68a           | 1            | 0            | 0          |
| RPRC002112      | IR75a           | 2,440        | 3,050        | 2,827      |
| RPRC000105      | IR75d           | 48           | 103          | 255        |
| RPRC000047      | IR75e           | 40           | 125          | 333        |
| RPRC002124      | IR75f           | 101          | 134          | 642        |
| RPRC000214      | IR75k           | 1,451        | 1,795        | 2,647      |
| RPRC000247      | IR75m           | 61           | 209          | 198        |
| RPRC000007      | IR75n           | 66           | 45           | 270        |
| RPRC000469      | IR76b           | 71           | 94           | 507        |
| RPRC000349      | IR8a            | 148          | 259          | 1,400      |
| RPRC008486      | IR93a           | 1,420        | 1,882        | 1,689      |
| RPRC014507      | mrityu          | 683          | 280          | 783        |
| RPRC007564      | narrowabdomen   | 1,291        | 507          | 1,452      |
| RPRC000296      | NMDA1           | 804          | 371          | 466        |
| RPRC006099      | NMDA2a          | 3            | 0            | 12         |
| RPRC001831      | NMDA2b          | 19           | 8            | 23         |
| RPRC000544      | NOMPC           | 196          | 112          | 192        |
| RPRC010284      | OBP1            | 27,221       | 41,610       | 23,759     |
| RPRC000560      | OBP10           | 294          | 362          | 382        |
| RPRC004408      | OBP11           | 3,176        | 10,026       | 12,463     |
| RPRC000492      | OBP12           | 4,506        | 68,339       | 57,789     |



| VectorBase Code   | Gene annotation | Larval reads | Female reads | Male reads |
|-------------------|-----------------|--------------|--------------|------------|
| RPRC000177        | OBP13           | 4,057        | 40,078       | 30,127     |
| RPRC004407        | OBP14           | 91,134       | 84,408       | 44,892     |
| RPRC008413        | OBP15           | 41           | 58           | 79         |
| RPRC011610        | OBP16           | 1425         | 1702         | 1040       |
| RPRC000118        | OBP17           | 26,650       | 235,443      | 163,756    |
| RPRC001924        | OBP18           | 44,544       | 550,594      | 333,946    |
| RPRC000593        | OBP19           | 17           | 81           | 62         |
| RPRC007008        | OBP20           | 70,257       | 361,259      | 266,432    |
| RPRC001925        | OBP21           | 7,251        | 58,737       | 29,346     |
| RPRC000115        | OBP22           | 14,745       | 34,244       | 17,398     |
| RPRC000174        | OBP23           | 25,498       | 39,280       | 21,922     |
| RPRC009905        | OBP24           | 191,366      | 1,340,736    | 742,932    |
| RPRC000257        | OBP25           | 508          | 5,542        | 3,022      |
| RPRC000182        | OBP26           | 8            | 0            | 1          |
| RPRC009914        | OBP27           | 14           | 2            | 0          |
| RPRC000527        | OBP3            | 366          | 2,315        | 1,533      |
| RPRC000274        | OBP4            | 144          | 154          | 103        |
| RPRC004413        | OBP6            | 37,479       | 416,555      | 268,638    |
| RPRC000311        | OBP7            | 6,460        | 56,913       | 46,034     |
| RPRC000564        | OBP8            | 20,309       | 30,048       | 14,713     |
| RPRC000194        | OBP9            | 6            | 22           | 9          |
| RPRC002158        | Or 93           | 9            | 119          | 111        |
| RPRC000579        | Or1             | 36           | 191          | 191        |
| RPRC000106        | Or10            | 5            | 6            | 17         |
| RPRC000522        | Or100           | 344          | 1,505        | 1,632      |
| RPRC000188        | Or101           | 37           | 398          | 386        |
| jose.estivalis020 | Or102           | 78           | 495          | 588        |
| RPRC000601        | Or103           | 145          | 777          | 523        |
| RPRC009806        | Or104           | 18           | 89           | 45         |
| RPRC000255        | Or105           | 441          | 1,036        | 1,032      |
| RPRC000371        | Or106           | 35           | 206          | 212        |
| RPRC001726        | Or107           | 28           | 89           | 85         |
| RPRC000301        | Or108           | 18           | 76           | 59         |
| RPRC001799        | Or109           | 0            | 11           | 54         |
| RPRC002141        | Or110           | 81           | 836          | 792        |
| RPRC002142        | Or111           | 31           | 164          | 153        |
| RPRC000555        | Or112           | 148          | 603          | 374        |
| RPRC001309        | Or113           | 39           | 116          | 177        |
| RPRC004306        | Or114           | 0            | 0            | 0          |
| jose.estivalis025 | Or115           | 53           | 103          | 55         |
| RPRC000376        | Or12            | 130          | 144          | 135        |
| RPRC002134        | Or12            | 0            | 4            | 8          |
| RPRC000362        | Or13            | 60           | 1367         | 821        |
| RPRC000166        | Or14            | 534          | 379          | 348        |

| VectorBase Code   | Gene annotation | Larval reads | Female reads | Male reads |
|-------------------|-----------------|--------------|--------------|------------|
| RPRC000420        | Or16            | 19           | 34           | 42         |
| RPRC001628        | Or17            | 46           | 1            | 2          |
| RPRC000616        | Or18            | 323          | 6,526        | 3,133      |
| RPRC000449        | Or19            | 80           | 303          | 238        |
| RPRC001689        | Or2             | 1            | 0            | 8          |
| RPRC000573        | Or20            | 258          | 1,967        | 1,523      |
| RPRC006570        | Or21            | 4            | 4            | 5          |
| RPRC000375        | Or22            | 27           | 33           | 35         |
| RPRC000149        | Or23            | 23           | 16           | 37         |
| RPRC001980        | Or24            | 0            | 6            | 25         |
| RPRC000029        | Or25            | 63           | 151          | 99         |
| RPRC000619        | Or26            | 48           | 232          | 317        |
| RPRC000331        | Or27            | 42           | 279          | 157        |
| RPRC000125        | Or29            | 10           | 16           | 10         |
| RPRC000059        | Or3             | 38           | 257          | 197        |
| RPRC000209        | Or30            | 359          | 209          | 193        |
| RPRC000423        | Or31            | 9            | 45           | 83         |
| RPRC000043        | Or32            | 64           | 276          | 200        |
| RPRC000235        | Or33            | 60           | 779          | 383        |
| jose.estivalis045 | Or34            | 64           | 305          | 223        |
| RPRC000337        | Or36            | 47           | 429          | 361        |
| RPRC000456        | Or37            | 75           | 544          | 522        |
| RPRC000530        | Or38            | 23           | 44           | 56         |
| RPRC000041        | Or39            | 71           | 693          | 1,008      |
| RPRC000120        | Or4             | 157          | 236          | 203        |
| RPRC000229        | Or40            | 41           | 472          | 315        |
| RPRC000146        | Or41            | 13           | 112          | 140        |
| RPRC000108        | Or42            | 1            | 44           | 92         |
| RPRC000140        | Or43            | 33           | 58           | 59         |
| RPRC001291        | Or44            | 42           | 420          | 351        |
| jose.estivalis006 | Or45            | 130          | 312          | 410        |
| RPRC001292        | Or46            | 24           | 237          | 416        |
| RPRC000413        | Or47            | 82           | 204          | 512        |
| RPRC001293        | Or48            | 43           | 174          | 208        |
| RPRC000433        | Or49            | 18           | 99           | 84         |
| RPRC000083        | Or5             | 8            | 43           | 51         |
| RPRC001623        | Or50            | 2            | 107          | 498        |
| RPRC000507        | Or51            | 120          | 147          | 201        |
| RPRC000201        | Or52            | 10           | 24           | 23         |
| RPRC002122        | Or53            | 124          | 1,897        | 1,456      |
| RPRC000055        | Or54            | 28           | 393          | 248        |
| RPRC002161        | Or55            | 44           | 281          | 212        |
| RPRC002162        | Or56            | 2            | 396          | 369        |
| RPRC000318        | Or57            | 668          | 380          | 422        |

| VectorBase Code   | Gene annotation | Larval reads | Female reads | Male reads |
|-------------------|-----------------|--------------|--------------|------------|
| RPRC000526        | Or58            | 173          | 2,072        | 1,171      |
| RPRC004587        | Or59            | 0            | 0            | 0          |
| RPRC002105        | Or60            | 11           | 37           | 19         |
| RPRC000208        | Or61            | 191          | 1,886        | 931        |
| RPRC002135        | Or62            | 6            | 10           | 223        |
| RPRC002136        | Or63            | 9            | 75           | 51         |
| RPRC000095        | Or64            | 35           | 95           | 61         |
| RPRC000132        | Or65            | 23           | 63           | 35         |
| RPRC000452        | Or66            | 63           | 156          | 110        |
| RPRC000222        | Or67            | 48           | 296          | 179        |
| RPRC000541        | Or68            | 12           | 82           | 77         |
| jose.estivalis012 | Or69            | 11           | 36           | 23         |
| RPRC002152        | Or7             | 35           | 99           | 118        |
| RPRC000459        | Or70            | 46           | 91           | 127        |
| RPRC000490        | Or71            | 99           | 249          | 135        |
| RPRC000053        | Or72            | 160          | 249          | 297        |
| RPRC000585        | Or73            | 21           | 26           | 23         |
| RPRC000200        | Or74            | 33           | 352          | 325        |
| RPRC000245        | Or75            | 7            | 22           | 18         |
| RPRC001928        | Or76            | 26           | 133          | 147        |
| RPRC000468        | Or77            | 67           | 674          | 608        |
| RPRC000733        | Or78            | 54           | 929          | 765        |
| RPRC000202        | Or79            | 42           | 199          | 332        |
| RPRC001154        | Or8             | 89           | 326          | 174        |
| RPRC000441        | Or80            | 12           | 119          | 126        |
| RPRC000363        | Or81            | 20           | 50           | 37         |
| RPRC002113        | Or82            | 29           | 67           | 40         |
| RPRC006981        | Or83            | 82           | 838          | 639        |
| RPRC000431        | Or84            | 13           | 159          | 329        |
| RPRC000882        | Or85            | 8            | 24           | 36         |
| RPRC000079        | Or86            | 14           | 100          | 106        |
| RPRC000317        | Or87            | 138          | 220          | 313        |
| RPRC000607        | Or88            | 8            | 60           | 64         |
| RPRC000165        | Or89            | 51           | 340          | 332        |
| RPRC000895        | Or9             | 94           | 83           | 81         |
| RPRC000249        | Or90            | 1            | 8            | 7          |
| RPRC000093        | Or91            | 5            | 0            | 0          |
| RPRC002009        | Or92            | 41           | 144          | 168        |
| RPRC002156        | Or94            | 111          | 264          | 267        |
| RPRC002157        | Or95            | 43           | 38           | 95         |
| RPRC001767        | Or96            | 71           | 487          | 448        |
| RPRC002120        | Or97            | 89           | 146          | 223        |
| RPRC000136        | Or98            | 63           | 403          | 392        |
| RPRC000065        | Or99            | 64           | 260          | 269        |

| VectorBase Code          | Gene annotation | Larval reads | Female reads | Male reads |
|--------------------------|-----------------|--------------|--------------|------------|
| RPRC000476               | Orco            | 689          | 7,107        | 10,892     |
| RPRC014024               | piezo           | 4,104        | 5,643        | 8,555      |
| RPRC014320               | PKD             | 0            | 0            | 0          |
| RPRC000048               | ppk-like10      | 2,063        | 2,468        | 1,681      |
| RPRC014276               | ppk-like8       | 38           | 38           | 44         |
| RPRC013510               | ppk-like1       | 191          | 214          | 151        |
| RPRC000471               | ppk-like2       | 78           | 106          | 98         |
| RPRC000341               | ppk-like4       | 251          | 157          | 208        |
| RPRC000099               | ppk-like9       | 344          | 346          | 283        |
| RPRC013907               | SNMP1a          | 1,205        | 17,772       | 19,724     |
| RPRC013910               | SNMP1b          | 906          | 5,231        | 4,895      |
| RPRC002754               | SNMP2           | 10,787       | 5,349        | 8,431      |
| RPRC001596               | TRPA5a          | 389          | 222          | 227        |
| RPRC001597               | TRPA5b          | 1,392        | 1,598        | 1,701      |
| RPRC000350               | TRPGamma        | 1,033        | 478          | 691        |
| RPRC000224               | TRPL            | 82           | 63           | 68         |
| RPRC007108               | TRPM            | 168          | 162          | 480        |
| RPRC000127               | WTRW            | 5,690        | 2,763        | 2,097      |
| RPRC002111               | IAV             | 1,545        | 973          | 1,052      |
| RPRC000454               | PAIN            | 8,150        | 6,240        | 5,928      |
| RPRC000422               | TRPA1           | 4            | 3            | 8          |
| RPRC000570               | TRPA5C          | 3            | 1            | 2          |
| jose.estivalisGR14a      | Gr14a           | 2            | 3            | 3          |
| jose.estivalisGR14b      | Gr14b           | 0            | 0            | 0          |
| jose.estivalisGR23a      | Gr23a           | 1            | 0            | 0          |
| jose.estivalisGR23b      | Gr23b           | 0            | 0            | 1          |
| jose.estivalisIR75b      | Ir75b           | 452          | 232          | 485        |
| jose.estivalisIR75c      | Ir75c           | 518          | 269          | 611        |
| jose.estivalisIR75g      | Ir75g           | 103          | 187          | 204        |
| jose.estivalisIR75h      | Ir75h           | 136          | 664          | 580        |
| jose.estivalisIR75i      | Ir75i           | 61           | 46           | 256        |
| jose.estivalisIR75j      | Ir75j           | 27           | 41           | 140        |
| jose.estivalisIR75l      | Ir75l           | 33           | 183          | 270        |
| jose.estivalisIR75o      | Ir75o           | 188          | 237          | 257        |
| jose.estivalisIR75p      | Ir75p           | 24           | 31           | 115        |
| jose.estivalisNan        | Nanchung        | 157          | 50           | 89         |
| jose.estivalisOr114      | Or114           | 13           | 17           | 13         |
| jose.estivalisOr28       | Or28            | 66           | 151          | 125        |
| jose.estivalisOr59       | Or59            | 0            | 0            | 0          |
| jose.estivalisppk104     | ppk-like6       | 316          | 211          | 207        |
| jose.estivalisppk13-like | ppk-like5       | 409          | 411          | 274        |
| jose.estivalisppk3       | ppk-like7       | 242          | 319          | 211        |
| jose.estivalisppk3-like  | ppk-like3       | 276          | 214          | 222        |
| RPRC009679               | TRPML           | 891          | 451          | 897        |

| <b>VectorBase Code</b> | <b>Gene annotation</b>    | <b>Larval reads</b> | <b>Female reads</b> | <b>Male reads</b> |
|------------------------|---------------------------|---------------------|---------------------|-------------------|
| RPRC006389             | Ammonium transporter 1    | 1,171               | 4,622               | 3,333             |
| RPRC014483             | Ammonium transporter 3    | 41                  | 80                  | 144               |
| RPRC007650             | Ammonium transporter Rh50 | 177                 | 175                 | 178               |
